# Supplementary material for: Next-generation gene drive for population modification of the malaria vector mosquito, Anopheles gambiae
Source: PubMed Central journal article supplement — Proc Natl Acad Sci U S A. 2020 Aug 24;117(37):22805–14. doi: 10.1073/pnas.2010214117 (PMC7502704; doi:10.1073/pnas.2010214117), 2020-08-24
Supplement: pnas.2010214117.sapp.pdf [file pnas.2010214117.sapp.pdf]

## SUPPORTING INFORMATION

### MATERIALS AND METHODS

**Table S1.** List of oligonucleotides and primers.

**Table S2.** List of plasmids.

**Table S3.** Gene drive frequencies and eye phenotypes from male- and female-derived AgNosCd-1 lineages.

**Table S4.** Insertion and deletions discovered using next-generation sequencing of genome *cardinal* gRNA target sites in tear-eye phenotype mosquitoes.

**Table S5.** ddPCR analysis of cage trial G<sub>2</sub> tear phenotypes.

**Table S6.** Tear intercrosses.

**Table S7.** Comparisons of life parameters of wild-type and AgNosCd-1 mosquitoes.

**Table S8.** Small cage trial data 1:1 ratio cage A-1.

**Table S9.** Small cage trial data 1:1 ratio cage A-2.

**Table S10.** Small cage trial data 1:1 ratio cage A-3.

**Table S11.** Small cage trial data 1:3 ratio cage B-1.

**Table S12.** Small cage trial data 1:3 ratio cage B-2.

**Table S13.** Small cage trial data 1:3 ratio cage B-3.

**Table S14.** Small cage trial data 1:9 ratio cage C-1.

**Table S15.** Small cage trial data 1:9 ratio cage C-2.

**Table S16.** Small cage trial data 1:9 ratio cage C-3.

**Table S17.** Sequence analysis of exceptional phenotype individuals (CFP<sup>-</sup>/cd<sup>-</sup>) from cage trials.

**Table S18.** Frequency of alternative alleles (single nucleotide polymorphisms [SNPs]) in the AgNosCd-1 guide RNA target site in colonized and wild populations of *Anopheles gambiae*.<sup>1</sup>

**Figure S1.** Mutations in *Agcd* result in modulations of ommochrome pathway metabolites.

**Figure S2.** Molecular validation of precise insertion of the pCO-37 plasmid into the *Agcd* locus.

**Figure S3.** Mating scheme to test male and female drive properties.

**Figure S4.** Phenotype and molecular analysis of mosaic individuals ('tear phenotype').

**Figure S5.** Small cage trial schematic.

**Figure S6.** Genomic off-target nucleotide sequence predictions and cleavage assay *in vitro* for the gRNA targeting site in *Agcd*.

**Figure S7.** Sanger sequencing results from predicted off-target sites in G<sub>8</sub> individuals.

**Figure S8.** Indel length and number of off-target 1 NGS deep sequencing reads.

**Figure S9.** off-target 1 deletions detected by NGS near predicted AgNosCd-1 and WT cut-sites.

### SUPPORTING TEXT.

Analysis of tear phenotypes.

### REFERENCES.

## MATERIALS AND METHODS

***Anopheles gambiae* cardinal gene target site selection.** The *Anopheles gambiae* heme peroxidase 6 gene (AgHPX6, AGAP003502) is the ortholog of the *cardinal* (*cd*) locus in *Drosophila melanogaster*. Genomic sequence of *Agcd* from the *An. gambiae* PEST (AgamP4) strain was accessed from VectorBase<sup>1</sup> (<https://www.vectorbase.org/>) and analyzed for potential targets and their associated off-target sites for Cas9 guide RNA- (gRNA) mediated endonuclease activity using the online tools Synthego (<https://design.synthego.com/#/validate>), ChopChop (<http://chopchop.cbu.uib.no/>) and SnapGene (<https://www.snapgene.com/>). Oligonucleotide primers and plasmids were designed using SnapGene (Table S1). The nucleotide sequence, 5'-GGTTAGCGACGATGCCAAGGCGG-3', within exon 3 of *Agcd* was chosen as the target of the gRNA. Regions flanking both ends of the target cut site were amplified from genomic DNA from the laboratory *An. gambiae* G3 strain (hereafter referred to as wild-type, WT) using oligonucleotide primers card-F1 and card-R1. The amplicon was sequenced to obtain the wild-type sequence for this genomic region.

### **Plasmid design and construction.**

**Target site.** Complementary single-stranded oligonucleotides, Agcard-target\_F and Agcard-target\_R, containing the *Agcd* target sequence were hybridized at 55°C for 30 minutes and cloned into a *Bbs*I-linearized plasmid, pCO-13 (Table S2), using the In-Fusion HD Cloning Kit (Takara Bio) to generate pCO-33.

**Homology arms.** Homology arm 2 (cHM2) was amplified from a cardF1/R1 product using oligonucleotides AflII-cardhm2\_F and AatII-cardhm2\_R. The cHM2 fragment was digested with *Afl*II/*Aat*II, while pCO-33 was digested with *Asc*I/*Aat*II to excise the U6-cardinal gRNA fragment. Both the cHM2 and U6-*Agcd* gRNA fragments were cloned into *Asc*I/*Aat*II-linearized pCO-16 using T4 DNA Ligase (Promega) to generate pCO-35. Homology arm 1 (cHM1) was amplified from the cardF1/R1 PCR product using the oligonucleotides SbfI-cardhm1\_F and PacI-cardhm1\_R and ligated into pCO-35 that had been linearized with *Sbf*I/*Pac*I to generate pCO-36. Finally, oligonucleotides Inf\_Agnos-cas9\_F and Inf\_Agnos-cas9\_R were used to amplify the Agnos-Cas9-T2A-DsRed cassette from pCO-18 and this was cloned into *Asc*I-linearized pCO-36 using the In-Fusion

HD Cloning Kit to generate the gene-drive construct designated pCO-37. Gene amplifications was performed using the CloneAmp HiFi PCR Premix (Takara Bio). Restriction enzymes were purchased from New England Biolabs. Oligonucleotides were synthesized by Sigma Aldrich. The integrity of all the plasmids was verified by sequencing. The final plasmid, pCO37, contains the *An. stephensi* codon-optimized SpCas9 endonuclease-encoding DNA<sup>1</sup> driven by the regulatory elements of the *An. gambiae* PEST strain *nanos* gene (AGAP006098) (Meredith et al. 2013); an *An. gambiae* U6 gene (AGAP013557) promoter expressing the gRNA complementary to the target site, three linked copies of the *D. melanogaster* P3 enhancer/promoter driving the expression of the cyan fluorescent protein marker gene (3XP3-CFP) for transgenic progeny identification, a  $\phi C31$  *attP* site and genomic DNA fragments ~1 kilobase pairs (kb) in length homologous to *Agcd* immediately adjacent to the 5'- and 3-ends of the target cut site (Figure 1).

**Microinjection of embryos and screening procedures.** Mosquitoes were maintained at 27 °C with 77% humidity and a 12-h day/night, 30-min dusk/dawn lighting cycle. Larvae were fed powdered fish food (Tetra-Min) mixed with yeast. Adults were provided *ad libitum* with water and a 10% (wt/vol) sucrose solution. Blood meals, defibrinated calf blood (Colorado Veterinary Products) were provided by an artificial feeding apparatus (Hemotek). Mosquito containment followed accepted procedures<sup>2</sup>. Microinjections were performed as described in Methods in Anopheles Research<sup>3</sup>. Embryos were injected with a solution containing 300 ng/ $\mu$ L of pCO-37, and 100 ng/ $\mu$ L of SpCas9 protein (PNA BIO Inc). Resulting adult G<sub>0</sub> males and females were outcrossed to WT mosquitoes of the opposite sex in pools of ~5 G<sub>0</sub> males or 15–30 G<sub>0</sub> females and progeny screened for CFP fluorescence using UV-fluorescence microscopy.

**Molecular validation of gene drive cassette integration.** Validation of precise integration was confirmed by amplification analysis with primers card-seqF1, eCFPseqR, AgU6 seq F, and card-seqR1, and sequencing amplicons comprising both the left- and right-hand junctions of the homology arms and cargo. Integration at the target gene locus was determined by amplification (primers upHM1cdn-F, eCFPseqR, AgU6 seq F, and dwnHM2cdn-R) of the left and right junctions of regions outside the genomic sequence included in the homology arms and cassette cargo. Hemizygous mosquitoes (one copy of the dominant CFP fluorescence gene)

cannot be readily distinguished from homozygotes (two copies), therefore, left and right portions of the homology arm sequences were amplified (primers card F2 and card-seqR1) to ascertain the presence of a WT *Agcd* allele. Genomic DNA extracts from single mosquitoes were obtained from homozygotes (AgNosCd-1-IX [IX denotes an intercross of transgenic mosquitoes]), hemizygotes (AgNosCd-1-OX [OX denotes an outcross of transgenic mosquitoes to WT]), and control WT using the Extract-N-Amp Tissue PCR kit (Sigma-Aldrich), modified for mosquito extraction<sup>4</sup>. The left- and right-hand junctions of the cassette cargo and homology arms were amplified by forward and reverse primer pairs (left junction, card-seqF1 and eCFPseqR; right junction, AgU6 seqF and card-seqR1). Left and right junctions of the cassette cargo and genomic sequence outside the homology arms were amplified by forward and reverse primer pairs (left junction, upHM1cdn-F and eCFPseqR; right junction, AgU6 seqF and dwnHM2cdn-R). The WT allele was amplified by forward and reverse primer pairs (card F2 and card-seqR1). The oligonucleotide primer pairs were used in 25  $\mu$ L reactions that included Phusion HF polymerase (New England Biolabs) with a DNA template from single AgNosCd-1-IX, AgNosCd-1-OX or WT mosquitoes. Cycling conditions to amplify the left junctions were 98°C initial denaturation for 1 minute; 30 cycles of 98°C denaturation for 10 seconds, 63°C annealing for 20 seconds and 72°C extension for 1 minute for amplicons < 2 kb in length or 2 minutes for amplicons > 2kb; and a 72°C final extension for 5 minutes. Cycling conditions for right junctions and the WT allele were identical except the annealing phases were carried out at 69°C. Ten  $\mu$ L of the amplification reactions were resolved and visualized in 1% agarose gels stained with Midori Green (BullDog-Bio, USA) with the 1 kb Plus ladder (ThermoFisher Scientific) size markers.

Approximately 40  $\mu$ L of each amplification reaction was purified using DNA clean and concentrator (Zymo Research), purified product then was diluted to 4 ng/ $\mu$ L. Exactly 10  $\mu$ L of product along with 5  $\mu$ L of the corresponding 5  $\mu$ M forward primer (left junction, card-seqF1; right junction, AgU6-gRNA-F) were premixed and submitted to GeneWiz (La Jolla, CA, USA) for Sanger sequencing. Sequences from the junction amplification fragments were aligned to a reference AgNosCd-1 cassette sequence using SnapGene to determine proper integration.

**Male and female lineage gene-drive dynamics.** The role of maternal effects and/or targeted SpCas9 activity at the *Agcd* gene in somatic cells<sup>1</sup> was assessed by crossing males and females hemizygous (originating from an outcross) for the AgNosCd-1 cassette with WT mosquitoes of the opposite sex and the progeny scored for eye phenotype and presence/absence of the CFP marker gene. Progeny with WT color eyes (deep purple/black) and the CFP marker gene (CFP<sup>+</sup>) were recovered as virgin males and females and crossed again to WT mosquitoes. Male and female founder lineages were maintained until the fourth generation of progeny had been screened or two successive generations of males had produced progeny.

**Mass spectrometry.** Metabolite quantification in the ommochrome biosynthetic pathway was carried out at the UCI Mass Spectrometry Facility on a Waters Aquity UPLC system and Waters Quattro Premier XE mass spectrometer using an Aquity UPLC CSP C18 1.7 $\mu$ M column and guard column. Metabolite extraction was done by submerging 10 adult mosquitoes (WT and AgNosCd-1 males and females) in 500  $\mu$ L of methanol with 1% formic acid (v/v) at 25°C for 24 hours. The solvent was centrifuged 5 minutes at 15,000 rpm, the recovered supernatants diluted 20-fold in 30% methanol and internal standards added prior to HPLC-MS/MS analysis. Analyses were performed in positive ion mode over a 5-minute run time with a flow rate of 0.3 mL/minute. Column and source temperatures were 50°C and 120°C, respectively. Gradient elution used solution A (H<sub>2</sub>O, 2% HCN, 0.2% acetic acid) and solution B (acetonitrile, 0.2% acetic acid) from 90% A/10% B over 0-3 minutes, 10% A/90% B over 3-4 minutes, and 90% A/10% B over 4-5 minutes. Triplicate quantification were performed with QuanLynx software, utilizing standard curves and internal standards. Tryptophan (TRP), kynurenine (KYN), 3-hydroxykynurenine (3-HK), kynurenic acid (KYNA), and xanthurenic acid (XA) standards were purchased from Sigma Aldrich (St. Louis, MO); tryptophan d<sub>3</sub> (TRP-d<sub>3</sub>) and kynurenic acid d<sub>5</sub> (KYNA-d<sub>5</sub>) from CDN Isotopes (Quebec, Canada); and 4-chlorokynurenine (4-ClKYN) from Toronto Research Chemicals (Ontario, Canada). All standards, solvents and reagents used were HPLC-quality.

**Tear Intercrosses.** The total mosaic progeny (tear) from G<sub>3</sub> (11 males, 31 females), G<sub>4</sub> (18 males, 29 females), and G<sub>5</sub> (11 males, 38 females) of the AgNosCd-1 cage trial in addition to 14 males and 16 females of the maternal-effect experiment, were intercrossed, with each separate generation representing an experimental

replicate. Mosaic phenotype mosquitoes were identified during pupation as part of the screening protocol for the cage trial and general screening for the maternal-effect experiment. All individuals from each replicate were mated in a single small cage (5000 cm<sup>3</sup>)<sup>4</sup> for 3-5 days. Gravid females oviposited for 3 days before eggs were collected. Early pupae were screened for CFP fluorescence and eye color. Hemizygous (CFP<sup>+</sup>/WT) and WT (CFP<sup>-</sup>) phenotypes were analyzed using Sanger sequencing. A total of 50 homozygous cardinal eye (red), CFP<sup>+</sup> individuals (CFP<sup>+</sup>/cd) were selected randomly from each of the four replicates for ddPCR analysis to screen for hidden insertion/deletion (indel) alleles, with Sanger sequencing performed on any indels found. All G<sub>0</sub> mosquitoes were individually assayed using ddPCR to assess indel frequency. DNA extractions of adults and pupae were performed using the Sigma Aldrich Extract-N-Amp Tissue PCR kit.

**Digital Droplet PCR (ddPCR) drop-off Assay.** Reactions were prepared as described in Carballar-Lejarazú et al.<sup>4</sup>. Briefly, reactions of 12.5 µL Bio-Rad ddPCR 2X Master Mix for probes (no UTP), 10 µL DNA (1 ng/µL), 1.25µL FAM/Forward (5 µM FAM probe, 18 µM forward primer), and 1.25 µL HEX/Reverse (5 µM HEX probe, 18 µM reverse primer) were prepared in a 96 well PCR plate. An estimated 30,000 haploid genome copies per 20 µL reaction were used assuming one *An. gambiae* haploid genome is 0.27 pg<sup>5</sup>. Droplets were generated using a Bio-Rad QX200 Droplet Generator (UCI Genomics High Throughput Facility) and transferred to a Bio-Rad 96 well PCR plate and heat-sealed with foil at 180°C for 5 seconds. Amplification was performed using a Bio-Rad C1000 Touch™ Thermal Cycler with 96-deep well reaction module with the following conditions: 95°C for 10 minutes; 40 cycles of 94°C for 30 seconds, 53°C for 1 minute, and 60°C for 2 minutes; and a final extension at 98°C for 10 minutes. A 2°C/second ramp rate was used for all steps. Droplets were read using a Bio-Rad QX200 Droplet Digital PCR (ddPCR) System. Data analysis was performed using the Bio-Rad Quantasoft Analysis Pro (version 1.0.596) in “Drop Off” experiment type requiring manual cluster designation.

**Life table parameters.** Life table parameters were assessed in AgNosCd-1 [hemizygous (AgNosCd-1-OX) and homozygous (AgNosCd-1-IX) mosquitoes and compared with the WT strain. Each experiment was performed in triplicate unless specified otherwise.

*Larva/pupa development:* Larval and pupal developmental time periods were recorded as the number of days it took for second-instar (L2) larvae to pupate and then form adults. One hundred hemizygous, homozygous or WT L2 were placed in containers with 400 ml of water and fed once a day. The larvae in each container were counted daily and survivors recorded. Individual pupae were removed, the sex ratio determined for each replicate and the animals placed in 6-ounce (~177 cm<sup>3</sup>) containers and monitored daily until adulthood.

*Adult longevity:* One hundred hemizygous, homozygous or WT newly-eclosed adult mosquitoes (fifty males and fifty females) were maintained in a colony cage and supplied with cotton balls moistened with a 1 M sucrose solution. Dead mosquitoes were collected and recorded daily until all mosquitoes had died.

*Female fecundity/fertility:* A total of 150 one to three-day old hemizygous, homozygous or WT virgin females were mated with 15 one to three-day old virgin WT males. Females were offered a single blood meal after two days of mating, and non-engorged females were removed from the cage and excluded from analysis. After three days, fed females were placed into individual containers (16-ounce, ~473 cm<sup>3</sup>) and provided with an egg cup for oviposition. The numbers of eggs laid and hatched were counted for each individual. Individuals that did not lay eggs were excluded from analysis. Fecundity was calculated as the number of eggs laid per female and fertility was calculated as the percentage of eggs hatched per female.

*Male contribution:* Male contribution to the next generation in a competitive environment was assessed by providing 150 one to three-day old virgin WT females either 75 AgNosCd-1-IX (homozygous) or 75 AgNosCd-1-OX (hemizygous) virgin males and 75 WT virgin males. Males were age-matched to the day and allowed three days to mate with females. After the mating period, females were provided with two successive days of blood meals using the artificial feeder. After feeding, females were allowed two days to complete their gonotrophic cycle and then provided an egg cup for oviposition for three days. A minimum of 1,000 larvae from each mating event were screened for the presence/absence of CFP fluorescence and the total number of CFP positive and negative mosquitoes were recorded. Experiments were performed with a minimum of four replicates for each mating and data tested using  $\chi^2$  with  $df = 1$ .

*Statistics:* Data analyses were performed using R statistical software (version 3.5.2, stats and pgirmess v1.6.9 packages). The Wilcoxon/Kruskal-Wallis nonparametric test was used to compare each strain for fecundity, fertility and larval/pupal development time period because the data did not follow a normal distribution. The Mann-Whitney nonparametric test was used to compare each strain for larval viability (independent variable) and pupae sex ratio (dependent variable). Adult survivorship was analyzed using the Wilcoxon test.

**Cage trials.** Triplicate (1-3) 5000 cm<sup>3</sup> cages were seeded with three single release ratios of homozygous AgNosCd-1-IX to WT adult males (A series: AgNosCd-1-IX:WT): 1:1 (75:75), B series: 1:3 (37:111), and C series: 1:9 (15:135) and WT adult females added to each cage to achieve an equal male:female ratio with a total population of ~300 individuals per cage<sup>6</sup>. Adults were blood-fed over two consecutive days, dead adults removed three days later, and an egg cup provided for two consecutive days. Larvae were hatched from the oviposition containers and 300 L2 selected randomly to establish the subsequent generation. Six hundred L2 were selected randomly to screen the larval and pupal eye phenotypes and the rest of the population reared to L4 and stored in 100% ethanol for population counts and molecular analysis. Cage trials were carried out for eleven non-overlapping generations.

*Eye phenotype screening.* The 600 randomly-selected individuals were screened as L4 for CFP fluorescence (CFP<sup>+</sup> or CFP<sup>-</sup>) and separated in two containers; pupae emerging from each container were screened for eye color: CFP<sup>+</sup>/WT<sup>+</sup> (CFP-positive drive mosquitoes with deep purple/black eyes [WT]); CFP<sup>+</sup>/cd<sup>-</sup> (CFP-positive drive mosquitoes with red eyes); CFP<sup>+</sup>/cd<sup>imos</sup> (CFP-positive drive mosquitoes with mosaic [tear] eyes).

*Population count:* Larvae in excess of the 300 and 600 used to re-establish the colony or reared to screen for eye color phenotypes were counted in bulk to determine population size at each generation.

**Variability of *Agcd* target site.** Whole genome sequencing data of individual mosquito were generated for 120 *An. gambiae sensu stricto* samples from natural populations collected in Mali (N=46), Cameroon (N=5), Tanzania (N=6), Zambia (N=7) and the Union of Comoros (N=56). Additionally, 100 samples from the closely-related species, *An. coluzzii*, from natural populations collected in Mali (N=66), Benin (N=11), Equatorial



Guinea (N=3), Cameroon (N=1) and São Tomé and Príncipe (N=19) were screened. Specimens were taken from the UC Davis Vector Genetics Laboratory's (VGL) archive and their genomic DNA sequenced on an Illumina HiSeq 4000 instrument. Quality-filtering of raw sequences for adapters was performed with Trimmomatic v0.36 (Bolger et al. 2014). Mapping of the short sequence reads used BWA MEM (Burrows-Wheeler Alignment MEM tool) v0.7.17-r1188<sup>7</sup> against the most current reference genome assembly 'AgamP4'<sup>8</sup>. Single nucleotide polymorphisms (SNPs) were called using Freebayes v1.2.0<sup>9</sup> applying default parameters but with theta = 0.01 and max-complex-gap = 3. No subsequent quality filtering of detected SNPs was conducted to ensure having the broadest possible set of potential variants available while being as conservative as possible.

The publicly available polymorphism data from the *Anopheles gambiae* 1000 Genomes Consortium (AG1000G,2 AR1 data release)<sup>10</sup> comprising calls from whole-genome sequence data from 590 *An. gambiae* specimens (N=81 from Burkina Faso, N=275 from Cameroon, N=56 from Gabon, N=31 from Guinea, N=44 from Kenya, N=103 from Uganda) was used<sup>10</sup>. An additional 129 *An. coluzzii* specimens were included (N=60 from Angola, N=69 from Burkina Faso). No filtering of polymorphism data was applied. VCF files of polymorphism data from both sources were used to screen the target site by genomic coordinates. Gene amplification reactions verifying SNPs utilized the primers HP6E4-F1 and HP6E4-R1 (Table S1).

**SpCas9 cleavage assay *in vitro* of WT and SNP variant target sites.** An assay *in vitro* tested the ability of the gRNA/SpCas9 complex to cleave the target site containing SNPs found in wild populations of African *An. gambiae*. Single-stranded oligonucleotides having the desired target sequences were obtained from Sigma Aldrich (card-target series primers: wt F and R, F1 through F5 and R1 through R5; Table S2). Forward and reverse oligonucleotide pairs for each DNA target sequence version were annealed and used in amplification reactions utilizing DreamTaq Polymerase (Thermo Fisher Scientific) (95°C for 30 seconds; 30 cycles of 95°C

30 seconds, 65°C for 15 seconds, 72°C for 5 seconds; and a final extension for 72°C for 10 seconds) to amplify double-stranded DNA fragments that then were cloned into the pCR4-TOPO vector (Invitrogen) via the TA cloning strategy. The target plasmids were sequenced to verify their integrity. A total of 200-500 ng of each test target plasmid (pCO-58 to pCO-62, pCO-66 to pCO-68, and pCO72 to pCO74) and the control plasmid (pCO-57) were linearized with *NcoI* at 37°C for 45 minutes, mixed with 300 ng of SpCas9/cardinal-gRNA mix that had previously been kept at 25°C for 10 minutes and finally incubated at 37°C for 26 minutes. Each reaction was treated with 1µl of Proteinase K and allowed to incubate at room temperature for 10 minutes before proceeding with agarose gel analysis.

**Off-target site analyses.** The CRISPR software packages Synthego (<https://design.synthego.com/#/validate>), ChopChop (<http://chopchop.cbu.uib.no/>), CRISPR RGEN (<http://www.rgenome.net/cas-offfinder/>) and CRISPOR (<http://crispor.tefor.net/>) were used to obtain a comprehensive prediction of the potential off-targets to the *Agcd* target sequence in the *An. gambiae* genome. The different predictions were compared and combined to yield a consensus final prediction. *Anopheles gambiae*-specific genomic DNA sequences were obtained from Vectorbase<sup>1</sup> ([www.vectorbase.org](http://www.vectorbase.org)). Analysis *in silico* of DNA sequences and design of primers were performed using the Snapgene ([www.snapgene.com](http://www.snapgene.com)) bioinformatics software. All primers designed (off-1-EZ-F and off-1-EZ-R, Table S1) were synthesized by Sigma-Aldrich ([www.sigmaaldrich.com](http://www.sigmaaldrich.com)). Extraction of genomic DNA from mosquitoes was performed using the Wizard Genomic DNA Extraction Kit (Promega). Genomic DNA was extracted from randomly selected homozygous AgNosCd-1. A total of 253 individuals were used: 25 generation 8 (G<sub>8</sub>) individuals (5 males; 20 females), 52 G<sub>9</sub> individuals (20 males; 32 females) and 176 G<sub>10</sub> individuals (84 males; 92 females). AgNosCd-1 mosquitoes were verified by CFP epifluorescence as well as by molecular validation prior to utilization. All plasmids were constructed using pCR4-TOPO (Invitrogen) as the backbone (Table S2). For plasmids pCO-66, 67 and 68, single-stranded forward and reverse DNA primers; card-offtarget-F1 and card-offtarget-R1; card-offtarget-F3 and card-offtarget-R3; card-target-wt-noPAM-F and

card-target-wt-noPAM-R, containing the target sequences were used in amplification reactions utilizing the DreamTaq Green PCR Master Mix (Thermo Fisher Scientific), and the amplicons purified and cloned into the pCR4-TOPO vector backbone by TA cloning. Plasmids pCO-72, 73 and 74 were generated using primers off-2\_F1 and off-2\_R1 in an amplification reaction with genomic DNA template. Plasmids were sequenced to confirm their integrity. The plasmids were used for the SpCas9 cleavage assay *in vitro* as described previously. SpCas9 activity *in vivo* at the predicted off-target sites was assessed by amplification of the genomic regions surrounding the predicted sites, sequencing the products and analyzing the sequences obtained for the presence of indels. Sanger sequencing was performed to assess the predicted off-target sites for each of 25 G<sub>8</sub> homozygous AgNosCd-1 individuals and the WT controls. Amplicon EZ deep sequencing was used for off-target 1 analysis of G<sub>9</sub> and G<sub>10</sub> individuals. For these latter two generations, the individual male samples from each respective generation were pooled and sequenced as one group, while the individual female samples also were pooled and sequenced as one group. Primers off-1-EZ-F and off-1-EZ-R were used to amplify the regions around the off-target 1 site from samples for deep sequencing.

### ***Sequencing mosquito samples.***

*DNA extractions:* A total of 125µL of 4:1 extract:tissue preparation mix (Sigma Aldrich Extract-N-Amp Tissue PCR kit) was used for pools of five mosquitoes and 62.5µL for single mosquitoes.

*Sanger sequencing:* Amplification reactions comprising 2 µL of Sigma DNA extract, 12.5µL NEB Phusion High Fidelity Polymerase, 1.25 µL of 10µM each primer Cd\_AmpF/R (Table S1), and 8 µL PCR-grade water were incubated at 98°C for 3 minutes; 35 cycles of 98°C for 30 seconds, 66.3°C for 30 seconds and 72°C for 30 seconds; followed by 72°C for 10 minutes and a 4°C hold. Reactions were resolved in 2% agarose gels for 15-30 minutes at 139V, the ~400 bp band was excised and DNA extracted using the Zymo Gel Extraction kit. Purified products were sequenced by Genewiz (La Jolla, CA, USA).

*Next Generation Sequencing (NGS):* Dual 50 µL amplification reactions were prepared for each sample using 4µL of Sigma DNA extract or 1 µL Promega DNA extract, 25 µL NEB Phusion High Fidelity Polymerase,

2.5 $\mu$ L of 10 $\mu$ M each primer Cd\_SeqF1/R1 (Table S1), and PCR-grade water. Samples were incubated at 98 $^{\circ}$ C for 3 minutes; 35 cycles of 98 $^{\circ}$ C for 30 seconds, 64 $^{\circ}$ C for 30 seconds and 72 $^{\circ}$ C for 30 seconds; followed by 72 $^{\circ}$ C for 10 minutes and a 4 $^{\circ}$ C hold. Sample were purified using the Zymo DNA Clean and Concentrator kit and the products sequenced by Genewiz (La Jolla, CA, USA).

**Table S1. List of oligonucleotides and primers.**

| Name of primer    | Sequence (5'– 3')                                                          |
|-------------------|----------------------------------------------------------------------------|
| card-F1           | CTGGAACAGCCGCTCGTCGT                                                       |
| card-R1           | CGGTACCGGCACCGTAGGCACC                                                     |
| Agcard-target_F   | TCCCCCTCGTCCTTGGTTAGCGACGATGCCAAGGGTTTTAGAGCTAGAA                          |
| Agcard-target_R   | TTCTAGCTCTAAAACCCCTTGGCATCGTCGCTAACCAAGGACGAGGGGAA                         |
| AflII-cardhm2_F   | TGACTTAAGTGGCATCGTCGCTAACCGCCGT                                            |
| AatII-cardhm2_R   | GAGGACGTCCGGTACCGGCACCGTAGGCACC                                            |
| SbfI-cardhm1_F    | ATTCCTGCAGGCTGGAACAGCCGCTCGTCGT                                            |
| PacI-cardhm1_R    | GTATTAATTAAGGCGGCCGCCATAGCGGATG                                            |
| Inf_Agnos-Cas9_F  | TACGCGTACGGCGCGCCGGCCGTGTGGTTTAACCCACCA                                    |
| Inf_Agnos-Cas9_R  | GTCTCTACGGGCGCGCCATAACTTCGTATAGCATACAT                                     |
| card-target-wt-F  | TAGTTGACTGAGTACGGCGGTTAGCGACGATGCCAAGGCCG <sup>1</sup>                     |
| card-target-wt-R  | CCGCTATGGCGGCCGCCTTGGCATCGTCGCTAACC <sup>1</sup>                           |
| card-target-F1    | TAGTTGACTGAGTACGGCGGTTAGCGACGATGCCAAGGCCG <sup>1</sup> <b>A</b>            |
| card-target-R1    | CCGCTATGGCGG <b>T</b> CGCCTTGGCATCGTCGCTAACC <sup>1</sup>                  |
| card-target-F2    | TAGTTGACTGAGTACGGCGGTTAGCGACGATG <b>A</b> CAAGGCCG <sup>1</sup>            |
| card-target-R2    | CCGCTATGGCGGCCGCCTT <b>G</b> TATCGTCGCTAACC <sup>1</sup>                   |
| card-target-F3    | TAGTTGACTGAGTACGGCGGTTAGCGACGA <b>A</b> GCCAAGGCCG <sup>*</sup>            |
| card-target-R3    | CCGCTATGGCGGCCGCCTTGG <b>C</b> TTCGTCGCTAACC <sup>1</sup>                  |
| card-target-F4    | TAGTTGACTGAGTACGGCGG <b>T</b> AAGCGACGATGCCAAGGCCG <sup>1</sup>            |
| card-target-R4    | CCGCTATGGCGGCCGCCTTGGCATCGTCGCT <b>T</b> ACC <sup>1</sup>                  |
| card-target-F5    | TAGTTGACTGAGTACGGC <b>A</b> GTTAGCGACGATGCCAAGGCCG <sup>1</sup>            |
| card-target-R5    | CCGCTATGGCGGCCGCCTTGGCATCGTCGCTA <b>A</b> CT <sup>1</sup>                  |
| card-offtarget-F1 | tagttgactgaGTACGGCGGTTA <b>CA</b> ACGAAACCAAGGTGG <sup>1,2</sup>           |
| card-offtarget-R1 | CCGCTATGGCGGCC <b>AC</b> CTTGGTTTCGT <b>T</b> GTTAACC <sup>1</sup>         |
| card-offtarget-F3 | tagttgactgaGTACGGCGGTTAGCGA <b>A</b> GATG <b>GC</b> ATTGTGG <sup>1,2</sup> |

|                        |                                                                   |
|------------------------|-------------------------------------------------------------------|
| card-offtarget-R3      | CCGCTATGGCGGCCACA <b>ATGCCATCTTCGCTAACC</b> <sup>1</sup>          |
| card-target-wt-noPAM-F | tagttgactgaGTACGGCGGTTAGCGACGATGCCAAGGCC <b>CC</b> <sup>1,2</sup> |
| card-target-wt-noPAM-R | CCGCTATGGCGGG <b>GG</b> GCCTTGGCATCGTCGCTAACC <sup>1</sup>        |
| off-1_F1               | GTACTGGTGCTAAAGCTCACGAGAG                                         |
| off-1_R1               | CTTTGCTTCCAGTGCTGCCGTAATG                                         |
| off-2_F1               | GTAGCGCGCACCCCGAGAACAC                                            |
| off-2_R1               | CCGGGCTCGGCGGCTTCGGTTG                                            |
| off-3_F1               | ACGGTGCCGTCGGACGGACCGG                                            |
| off-3_R1               | GTTTCGTGAAGGTGATCGCGGT                                            |
| off-1-EZ-F             | ACACTCTTTCCCTACACGACGCTCTTCCGATCTACAAGTGGATGATATCCCTGAACA         |
| off-1-EZ-R             | GACTGGAGTTCAGACGTGTGCTCTTCCGATCTAGTGCCTGTCTCGGCTGCTGTATG          |
| card-seqF1             | CGATATGCCATCGCCATAG                                               |
| eCFPseqR               | GCCTTGATGCCGTTCTTCT                                               |
| AgU6 seqF              | CCCGAGCACACACTTTCTTGC                                             |
| card-seqR1             | GTGCATTTGCGCTGGCGATCGT                                            |
| upHM1cdn-F             | CAAACCTCGGCGTACGTGAT                                              |
| dwnHM2cdn-R            | GGACTGGTCGTCGACACATCT                                             |
| card F2                | GCAAGGCTGTTGTGGTGCCGG                                             |
| AgU6-gRNA-F            | CGTGCAATGTTCTTTTCGCAACC                                           |
| Cd_Amp_F               | GTACTCGTACGGTCGCTCCTTA                                            |
| Cd_Amp_R               | ATTGTTGTTGCAGATGAGTCGT                                            |
| ddPCR_F                | AAGGAGGGCGAGTTAAG                                                 |
| ddPCR_R                | TGTTGTTGCAGATGAGTC                                                |
| HP6E4-F1               | CGCAC CGGCAAATCCATC                                               |
| HP6E4-R1               | GCAGATGAGTCGTCACCCGAG                                             |

1. Wild-type, variant and potential off-target gRNA target sites underlined with the polymorphic nucleotides shown in bold red.  
2. Lower case nucleotides in card-offtarget-F1, card-offtarget-F3 and card-target-wt-noPAM-F prevent expression of the lethal gene, *ccdB* in the plasmid vector pCR4-TOPO. This cloning plasmid uses expression of this gene to kill insert-negative clones, instead of the classical blue/white selection for positive clones. The *cardinal* target sequences cloned into the vector are short and the inserted nucleotides prevent read-through translation following transcription to ensure successful cloning.

| <b>Table S2. List of plasmids.</b>                                                                                   |                                       |
|----------------------------------------------------------------------------------------------------------------------|---------------------------------------|
| <b>Name of plasmid</b>                                                                                               | <b>Description</b>                    |
| pCO-13 (pBSK_U6-BbsI-gRNA scaffold)                                                                                  |                                       |
| pCO-16 (pHM1_3xp3-CFP_U6-pugilist gRNA_pHM2)                                                                         |                                       |
| pCO-18(pB_Agnos-Cas9-T2A-DsRed_3XP3CFP)                                                                              |                                       |
| pCO-33 (U6-cardinal gRNA)                                                                                            |                                       |
| pCO-35 (pHM1_3xp3-CFP_U6-cardinal gRNA_cHM2)                                                                         |                                       |
| pCO-36 (cHM1_3xp3-CFP_U6-cardinal gRNA_cHM2)                                                                         |                                       |
| pCO-37 (cHM1_3xp3-CFP_Agnos-Cas9-T2A-DsRed_U6-cardinal gRNA_cHM2)                                                    | AgNosCd1 gene-drive plasmid           |
| pCO-57, pCR4-TOPO_cardinal (GGTTAGCGACGATGCCAAGG <b>CGG</b> )*                                                       | Wild-type, on-target positive control |
| pCO-58, pCR4-TOPO_cardinal SNP1 (GGTTAGCGACGATGCCAAGG <b>CGA</b> )*                                                  | Wild-type SNP variant, SNP in PAM     |
| pCO-59, pCR4-TOPO_cardinal SNP2 (GGTTAGCGACGATG <b>ACA</b> AGG <b>CGG</b> )*                                         | Wild-type SNP variant                 |
| pCO-60, pCR4-TOPO_cardinal SNP3 (GGTTAGCGACG <b>AA</b> GCCAAGG <b>CGG</b> )*                                         | Wild-type SNP variant                 |
| pCO-61, pCR4-TOPO_cardinal SNP4 (GGT <b>A</b> AGCGACGATGCCAAGG <b>CGG</b> )*                                         | Wild-type SNP variant                 |
| pCO-62, pCR4-TOPO_cardinal SNP5 ( <b>A</b> GGTTAGCGACGATGCCAAGG <b>CGG</b> )*                                        | Wild-type SNP variant                 |
| pCO-66 (GGTTA <b>ACA</b> ACG <b>AA</b> CCAAGG <b>TGG</b> )*                                                          | Off-target 1 variant                  |
| pCO-67 (GGTTAGCGA <b>AG</b> ATG <b>GCA</b> TTG <b>TGG</b> )*                                                         | Off-target 3 variant                  |
| pCO-68 (GGTTAGCGACGATGCCAAGG <b>CCC</b> )*                                                                           | No PAM, on-target negative control    |
| pCO-72 (GGTTAGCC <b>CAG</b> G <b>CG</b> GCCAAGG <b>TGG</b> )*                                                        | Off-target 2-1 variant                |
| pCO-73 (GGTTAGCC <b>CAG</b> G <b>CAG</b> CCAAGG <b>TGG</b> )*                                                        | Off-target 2-2 variant                |
| pCO-74 (GGTTAGCC <b>CAG</b> G <b>CG</b> GCCAAG <b>ATGG</b> )*                                                        | Off-target 2-3 variant                |
| *(5'-3'target sequence + <u>PAM</u> , nucleotide variants from the wild-type target sequence are shown in bold red). |                                       |

**Table S3. Gene drive frequencies and eye phenotypes from male- and female-derived AgNosCd-1 lineages.**

| Generation     | Male founder lineage drive efficiency <sup>1,2</sup> |                      |                      | Female founder lineage drive efficiency <sup>1,2</sup> |                      |                      |                      |                      |
|----------------|------------------------------------------------------|----------------------|----------------------|--------------------------------------------------------|----------------------|----------------------|----------------------|----------------------|
| F <sub>1</sub> | ♂ 97.8%<br>(895/915)                                 |                      |                      | ♀ 96.2%<br>(769/799)                                   |                      |                      |                      |                      |
| F <sub>2</sub> | ♂ 97.3%<br>(918/943)                                 | ♀ 97.9%<br>(559/571) |                      | ♂ 95.7%<br>(381/398)                                   |                      | ♀ 85.0%<br>(164/193) |                      |                      |
| F <sub>3</sub> | --                                                   | ♂ 98.3%<br>(914/930) | ♀ 95.3%<br>(344/361) | ♂ 99.3%<br>(664/669)                                   | ♀ 95.9%<br>(445/464) | ♂ 98.2%<br>(490/499) | ♀ 96.2%<br>(930/967) |                      |
| F <sub>4</sub> | --                                                   | --                   | ♂ 98.4%<br>(362/368) | --                                                     | ♂ 99.1%<br>(112/113) | ♀ 92.4%<br>(73/79)   | ♂ 100%<br>(222/222)  | ♀ 90.6%<br>(125/138) |
| Generation     | Male founder lineage cardinal eye <sup>3</sup>       |                      |                      | Female founder lineage cardinal eye <sup>3</sup>       |                      |                      |                      |                      |
| F <sub>1</sub> | ♂ 0% (0/915)                                         |                      |                      | ♀ 0% (0/799)                                           |                      |                      |                      |                      |
| F <sub>2</sub> | ♂ 0% (0/943)                                         | ♀ 0.3% (2/571)       |                      | ♂ 0% (0/398)                                           |                      | ♀ 0% (0/193)         |                      |                      |
| F <sub>3</sub> | --                                                   | ♂ 0%<br>(0/930)      | ♀ 0%<br>(0/361)      | ♂ 0%<br>(0/669)                                        | ♀ 0%<br>(0/464)      | ♂ 0%<br>(0/499)      | ♀ 0.1%<br>(1/967)    |                      |
| F <sub>4</sub> | --                                                   | --                   | ♂ 0%<br>(0/368)      | --                                                     | ♂ 0%<br>(0/113)      | ♀ 1.3%<br>(1/79)     | ♂ 0%<br>(0/222)      | ♀ 1.4%<br>(2/138)    |
| Generation     | Male lineage tear eye <sup>4</sup>                   |                      |                      | Female lineage tear eye <sup>4</sup>                   |                      |                      |                      |                      |
| F <sub>1</sub> | ♂ 0% (0/915)                                         |                      |                      | ♀ 7% (53/799)                                          |                      |                      |                      |                      |
| F <sub>2</sub> | ♂ 0% (0/943)                                         | ♀ 0.3% (2/571)       |                      | ♂ 0% (0/398)                                           |                      | ♀ 0% (0/193)         |                      |                      |
| F <sub>3</sub> | --                                                   | ♂ 0.1%<br>(1/930)    | ♀ 3.9%<br>(14/361)   | ♂ 0.9%<br>(6/669)                                      | ♀ 8.2%<br>(38/464)   | ♂ 1.0%<br>(5/499)    | ♀ 6.0% (58/967)      |                      |
| F <sub>4</sub> | --                                                   | --                   | ♂ 0.3%<br>(1/368)    | --                                                     | ♂ 0.9%<br>(1/113)    | ♀ 6.8%<br>(5/79)     | ♂ 0.5%<br>(1/222)    | ♀ 3.0%<br>(4/138)    |

1. Symbols refer to the sex of the gene-drive parents: ♂ male gene-drive parents; ♀ female gene-drive parents.
  2. Drive efficiency was determined by calculating the percentage of progeny expressing the CFP marker gene out of the total originating from the mating event.
  3. Eye phenotype was determined by calculating the percentage of heteroallelic progeny containing one copy of the drive element (CFP<sup>+</sup>) and one resistant mutant *cardinal* (*cd*<sup>-</sup>) allele out of the total originating from the mating event.
  4. Eye phenotype was determined by calculating the percentage of progeny showing the tear phenotype (Figure S3) out of the total originating from the mating event.
- , Not determined.



**Table S4. Insertion and deletions discovered using next-generation sequencing of genome *cardinal* gRNA target sites in tear-eye phenotype mosquitoes.**

| Target Sequence <sup>1</sup> | Reads | Type     | % Reads <sup>2</sup> | Indel Size |
|------------------------------|-------|----------|----------------------|------------|
| CCTTGGCATCGTCGCTAACC         | 62148 | WT       | 56.55                | 0          |
| ----GGCATCGTCGCTAACC         | 8045  | Deletion | 7.32                 | -4         |
| -----GCATCGTCGCTAACC         | 6642  | Deletion | 6.04                 | -5         |
| CC-----TCGTCGCTAACC          | 3695  | Deletion | 3.36                 | -6         |
| CC-----TCGCTAACC             | 3374  | Deletion | 3.07                 | -9         |
| CCT-----GTCGCTAACC           | 2949  | Deletion | 2.68                 | -7         |
| -----CGCTAACC                | 1875  | Deletion | 1.71                 | -12        |
| CCT-----TCGCTAACC            | 1860  | Deletion | 1.69                 | -8         |
| CCT----ATCGTCGCTAACC         | 1704  | Deletion | 1.55                 | -4         |
| CCT-----TCGTCGCTAACC         | 1274  | Deletion | 1.16                 | -5         |
| CCT-----GCTAACC              | 950   | Deletion | 0.86                 | -10        |
| CC-TGGCATCGTCGCTAACC         | 862   | Deletion | 0.78                 | -1         |
| CCT-----                     | 738   | Deletion | 0.67                 | -17        |
| -----GTCGCTAACC              | 627   | Deletion | 0.57                 | -10        |
| CCT---CATCGTCGCTAACC         | 594   | Deletion | 0.54                 | -3         |
| -----CC                      | 592   | Deletion | 0.54                 | -18        |
| CCT-----CTAACC               | 472   | Deletion | 0.43                 | -11        |
| ----AGCATCGTCGCTAACC         | 438   | Deletion | 0.39                 | -4         |
| ---TGGCATCGTCGCTAACC         | 438   | Deletion | 0.39                 | -3         |
| -----CGTCGCTAACC             | 357   | Deletion | 0.32                 | -9         |
| -----GCTAACC                 | 311   | Deletion | 0.28                 | -13        |
| ----GTCATCGTCGCTAACC         | 299   | Deletion | 0.27                 | -4         |
| -----ATCGTCGCTAACC           | 297   | Deletion | 0.27                 | -7         |
| -----TCGTCGCTAACC            | 245   | Deletion | 0.22                 | -8         |
| -----TCGCTAACC               | 228   | Deletion | 0.21                 | -11        |
| CCT-----GCCACTAACC           | 227   | Deletion | 0.20                 | -7         |
| CCTT----TCGTCGCTAACC         | 225   | Deletion | 0.20                 | -4         |
| C-----CTAACC                 | 220   | Deletion | 0.20                 | -13        |
| -----CATCGTCGCTAACC          | 216   | Deletion | 0.19                 | -6         |
| CCT--GCATCGTCGCTAACC         | 215   | Deletion | 0.19                 | -2         |
| -----AACC                    | 212   | Deletion | 0.19                 | -16        |
| CC-TCGCATCGTCGCTAACC         | 194   | Deletion | 0.18                 | -1         |
| -----TACGC                   | 177   | Deletion | 0.16                 | -15        |
| CCT-----TAACC                | 177   | Deletion | 0.16                 | -12        |
| C-----CGTCGCTAACC            | 162   | Deletion | 0.15                 | -8         |
| ----CGCATCGTCGCTAACC         | 134   | Deletion | 0.12                 | -4         |
| -----TTGTCGCTAACC            | 116   | Deletion | 0.11                 | -8         |
| C-----CATCGTCGCTAACC         | 115   | Deletion | 0.10                 | -5         |
| ----GGCCTCGTCGCTAACC         | 107   | Deletion | 0.097                | -4         |

|                               |    |                        |       |     |
|-------------------------------|----|------------------------|-------|-----|
| C-----                        | 95 | Deletion               | 0.086 | -19 |
| CCTAtGCCA-----CTAACC          | 90 | Insertion and Deletion | 0.082 | -5  |
| CC--GGCATCGTCGCTAACC          | 87 | Deletion               | 0.079 | -2  |
| CCTCagCGCATCGTCGCTAACC        | 87 | Insertion              | 0.079 | 2   |
| -----CCGCTAACC                | 85 | Deletion               | 0.077 | -11 |
| -----ACC                      | 83 | Deletion               | 0.075 | -17 |
| CC-----                       | 80 | Deletion               | 0.073 | -18 |
| ---TCGCATCGTCGCTAACC          | 79 | Deletion               | 0.072 | -3  |
| ----GGTTTTTTCGCTAACC          | 74 | Deletion               | 0.067 | -4  |
| C---GGCATCGTCGCTAACC          | 73 | Deletion               | 0.066 | -3  |
| C-----CGCTAACC                | 68 | Deletion               | 0.062 | -11 |
| CCTCtGGCATCGTCGCTAACC         | 68 | Insertion              | 0.062 | 1   |
| TC-----                       | 67 | Deletion               | 0.061 | -18 |
| CCT-----ACC                   | 64 | Deletion               | 0.058 | -14 |
| CC---GCATCGTCGCTAACC          | 63 | Deletion               | 0.057 | -3  |
| ---ACGCATCGTCGCTAACC          | 61 | Deletion               | 0.055 | -3  |
| CCTAtggcGGCATCGTCGCTAACC      | 61 | Insertion              | 0.055 | 4   |
| C-----CATAGCTAACC             | 60 | Deletion               | 0.054 | -8  |
| -----GCTA---                  | 57 | Deletion               | 0.052 | -16 |
| -CT---ACtCGTCGCTAACC          | 57 | Insertion and Deletion | 0.052 | -4  |
| C-----AATCGTCGCTAACC          | 52 | Deletion               | 0.047 | -5  |
| CtaaccgcccacC-----CGTCGCTAACC | 51 | Insertion and Deletion | 0.046 | 3   |
| -----CATCG-CGCTAACC           | 49 | Deletion               | 0.044 | -7  |
| -CATGCCATCCggCCGCTAACC        | 47 | Insertion and Deletion | 0.043 | 1   |
| CCTCgcccGGCATCGTCGCTAACC      | 47 | Insertion              | 0.043 | 3   |
| -----C                        | 46 | Deletion               | 0.042 | -19 |
| --ATGGCATCGTCGCTAACC          | 46 | Deletion               | 0.042 | -2  |
| --TT-----CTAACC               | 46 | Deletion               | 0.042 | -12 |
| CCT-----CC                    | 45 | Deletion               | 0.041 | -15 |
| CCTT--CATCGTCGCTAACC          | 45 | Deletion               | 0.041 | -2  |
| -----TAACC                    | 44 | Deletion               | 0.040 | -15 |
| CC-TGCCA-----GCTAACC          | 44 | Deletion               | 0.040 | -6  |
| -----TAGCTAACC                | 43 | Deletion               | 0.039 | -11 |
| -CTTACCTT--TCTatgCTAACC       | 43 | Insertion and Deletion | 0.039 | 0   |
| CTatcctgcTAtGGCATCGTCGCTAACC  | 43 | Insertion              | 0.039 | 8   |
| CCTT-----TCGCTAACC            | 40 | Deletion               | 0.036 | -7  |
| TCTTG--ATCGTCGCTAACC          | 40 | Deletion               | 0.036 | -2  |
| -----GGTCGCTAACC              | 39 | Deletion               | 0.035 | -9  |
| ----GG----ATCGCTAACC          | 37 | Deletion               | 0.034 | -8  |
| CC-TCGCGTCGTCGCTAACC          | 37 | Deletion               | 0.034 | -1  |
| -----CATCGCCATCC              | 36 | Deletion               | 0.033 | -9  |
| -----TATCGTCGCTAACC           | 36 | Deletion               | 0.033 | -6  |
| --TCGGCATCGTCGCTAACC          | 36 | Deletion               | 0.033 | -2  |
| CGAT--AACCGTTccGCTAACC        | 36 | Insertion and Deletion | 0.033 | 0   |

|                                    |    |                        |       |     |
|------------------------------------|----|------------------------|-------|-----|
| CC-----AGC                         | 34 | Deletion               | 0.031 | -15 |
| CCTAtGGCATCGTCGCTAACC              | 33 | Insertion              | 0.030 | 1   |
| CCTT-----GCTAACC                   | 33 | Deletion               | 0.030 | -9  |
| C-----GGTCGCTAACC                  | 30 | Deletion               | 0.027 | -8  |
| CCT-----C                          | 30 | Deletion               | 0.027 | -16 |
| C---GGTACCGgTCGCTAACC              | 29 | Insertion and Deletion | 0.026 | -2  |
| CCTT---ATCGTCGCTAACC               | 26 | Deletion               | 0.024 | -3  |
| CCTtTGGCATCGTCGCTAACC              | 26 | Insertion              | 0.024 | 1   |
| C-----TATCGTCGCTAACC               | 25 | Deletion               | 0.023 | -5  |
| CCGT-----ACC                       | 25 | Deletion               | 0.023 | -13 |
| CTatccgctaTCCGCATCGTCGCTAACC       | 25 | Insertion              | 0.023 | 8   |
| --TT-----                          | 24 | Deletion               | 0.022 | -18 |
| -----TAACCGCTAACC                  | 23 | Deletion               | 0.021 | -8  |
| -----AGTCGCTAACC                   | 22 | Deletion               | 0.020 | -9  |
| --TTAGCATCGTCGCTAACC               | 22 | Deletion               | 0.020 | -2  |
| C----GCATCGTCGCTAACC               | 22 | Deletion               | 0.020 | -4  |
| CCTGgggcatcgccggGGCATCGTCGCTAACC   | 22 | Insertion              | 0.020 | 13  |
| CCTT-----GTCGCTAACC                | 22 | Deletion               | 0.020 | -6  |
| -----CG----CC                      | 21 | Deletion               | 0.019 | -16 |
| -CAAGGCATCGTCGCTAACC               | 21 | Deletion               | 0.019 | -1  |
| AtggccgcataCGTCGCATCGTCGCTAACC     | 21 | Insertion              | 0.019 | 10  |
| C--TGGCATCGTCGCTAACC               | 21 | Deletion               | 0.019 | -2  |
| -----CATCGCTAACC                   | 20 | Deletion               | 0.018 | -9  |
| C----TAATCGTCGCTAACC               | 20 | Deletion               | 0.018 | -4  |
| CCTTctCGCATCGTCGCTAACC             | 20 | Insertion              | 0.018 | 2   |
| -----ACG                           | 19 | Deletion               | 0.017 | -17 |
| -----ACTAATC                       | 19 | Deletion               | 0.017 | -13 |
| --TTTGCA----CGCTAACC               | 19 | Deletion               | 0.017 | -6  |
| -CT----ATCGTCGCTAACC               | 19 | Deletion               | 0.017 | -5  |
| CCTtTGTCGTCGTCGCTAACC              | 19 | Insertion              | 0.017 | 1   |
| -----CTAACC                        | 17 | Deletion               | 0.015 | -14 |
| -----GCCTCGTCGCTAACC               | 17 | Deletion               | 0.015 | -5  |
| -----GCGTCGTCGCTAACC               | 17 | Deletion               | 0.015 | -5  |
| ----GGCATCGCCGCTAACC               | 17 | Deletion               | 0.015 | -4  |
| ----GGCATCGGCGCTAACC               | 17 | Deletion               | 0.015 | -4  |
| CCAT---ATCGTCGCTAACC               | 16 | Deletion               | 0.014 | -3  |
| CCTCagtGAagCATCGTCGCTAACC          | 16 | Insertion              | 0.014 | 5   |
| CTATGGC--GGTCGCTAACC               | 16 | Deletion               | 0.014 | -2  |
| -----GCATCGCCGCTAACC               | 14 | Deletion               | 0.013 | -5  |
| ----GGCTTCGTCGCTAACC               | 14 | Deletion               | 0.013 | -4  |
| ---TAACCT-GTCGCTAACC               | 14 | Deletion               | 0.013 | -4  |
| C-----GGATAACC                     | 14 | Deletion               | 0.013 | -11 |
| CC---GTACCGTtccccgtaccgtttCGCTAACC | 14 | Insertion and Deletion | 0.013 | 11  |
| -----AA--                          | 13 | Deletion               | 0.012 | -18 |

|                                            |    |                        |        |     |
|--------------------------------------------|----|------------------------|--------|-----|
| -----CGTC-----                             | 13 | Deletion               | 0.012  | -16 |
| CC-----CGTCGCTAACC                         | 13 | Deletion               | 0.012  | -7  |
| CCT----ACCGTCGCTAACC                       | 13 | Deletion               | 0.012  | -4  |
| CCT---AATCGTCGCTAACC                       | 13 | Deletion               | 0.012  | -3  |
| CCTAaccgccgcctAGCATCGTCGCTAACC             | 13 | Insertion              | 0.012  | 10  |
| CCTCGTcggcggcgCATCGTCGCTAACC               | 13 | Insertion              | 0.012  | 8   |
| ----GCCATCGTCGCTAACC                       | 12 | Deletion               | 0.011  | -4  |
| CCTCgctaaccgccgctaaccGGCATCGTCGCTAACC      | 12 | Insertion              | 0.011  | 17  |
| CCTT-----C                                 | 12 | Deletion               | 0.011  | -15 |
| -----CGCTA---                              | 11 | Deletion               | 0.011  | -15 |
| -----ACCGCTAACC                            | 11 | Deletion               | 0.011  | -10 |
| -----ATCGCTAACC                            | 11 | Deletion               | 0.011  | -10 |
| -----CAT-----                              | 11 | Deletion               | 0.011  | -17 |
| -----ACATCGTCGCTAACC                       | 11 | Deletion               | 0.011  | -5  |
| ----GACATCGTCGCTAACC                       | 11 | Deletion               | 0.011  | -4  |
| ---AGGCATCGTCGCTAACC                       | 11 | Deletion               | 0.011  | -3  |
| --TTTATTTTCTCGCTCACC                       | 11 | Deletion               | 0.011  | -2  |
| -CTAtGG-----CGCTAACC                       | 11 | Insertion and Deletion | 0.011  | -6  |
| AC-----CGCTAACC                            | 11 | Deletion               | 0.011  | -10 |
| C-----GATGGTCGCTAACC                       | 11 | Deletion               | 0.011  | -5  |
| CCATCcgctatggcgGCATCGTCGCTAACC             | 11 | Insertion              | 0.011  | 10  |
| CCT---CGTCGTCGCTAACC                       | 11 | Deletion               | 0.011  | -3  |
| CTATGGTcATCGTCGCTAACC                      | 11 | Insertion              | 0.011  | 1   |
| -----GAATCGTCGCTAACC                       | 10 | Deletion               | 0.009  | -5  |
| -----GCATCTTCGCTAACC                       | 10 | Deletion               | 0.009  | -5  |
| -CTAACCAT-ATCGCTAACC                       | 10 | Deletion               | 0.009  | -2  |
| AtcC---GCATCGTCGCTAACC                     | 10 | Insertion and Deletion | 0.009  | -1  |
| CATAtGGCATCGTCGCTAACC                      | 10 | Insertion              | 0.009  | 1   |
| CC-----CGCTAACC                            | 10 | Deletion               | 0.009  | -10 |
| CCGtT-----                                 | 10 | Insertion and Deletion | 0.009  | -15 |
| CCT-----GCCGCTAACC                         | 10 | Deletion               | 0.009  | -7  |
| CCTCGG--TCGTCGCTAACC                       | 10 | Deletion               | 0.009  | -2  |
| CCTTG-----CGCTAACC                         | 10 | Deletion               | 0.009  | -7  |
| CtaacC---GCACCGTCGCTAACC                   | 10 | Insertion and Deletion | 0.009  | 1   |
| -----CGCAAACC                              | 9  | Deletion               | 0.0081 | -12 |
| -----CTCTAACC                              | 9  | Deletion               | 0.0081 | -12 |
| ---TGAaagaacacgaatcgaaag-<br>ATCGTCGCTAACC | 9  | Insertion and Deletion | 0.0081 | 15  |
| -CT----AT-GTCGCTAACC                       | 9  | Deletion               | 0.0081 | -6  |
| ACT-----GTCGCTAACC                         | 9  | Deletion               | 0.0081 | -7  |
| C-----TCGTCGCTAACC                         | 9  | Deletion               | 0.0081 | -7  |
| CC-----CCGCTAACC                           | 9  | Deletion               | 0.0081 | -9  |
| GCTCGGCTaTGgGTCGCTAACC                     | 9  | Insertion              | 0.0081 | 2   |
| -----CTA---                                | 8  | Deletion               | 0.0072 | -17 |
| -----CACCAT-GCTAACC                        | 8  | Deletion               | 0.0072 | -7  |

|                                |   |                        |        |     |
|--------------------------------|---|------------------------|--------|-----|
| -----CATC--CGCTAACC            | 8 | Deletion               | 0.0072 | -8  |
| -----GCATCGGCGCTAACC           | 8 | Deletion               | 0.01   | -5  |
| ----GGAATCGTCGCTAACC           | 8 | Deletion               | 0.01   | -4  |
| ----GGCAGCGTCGCTAACC           | 8 | Deletion               | 0.01   | -4  |
| ----TGCATCGTCGCTAACC           | 8 | Deletion               | 0.01   | -4  |
| -CT---AATCCggTCGCTAACC         | 8 | Insertion and Deletion | 0.01   | -2  |
| C-----CGTCGTCGCTAACC           | 8 | Deletion               | 0.01   | -5  |
| CAgcacATCGCATCGTCGCTAACC       | 8 | Insertion              | 0.01   | 4   |
| CCT-----GATGCCAACC             | 8 | Deletion               | 0.01   | -7  |
| CCT--CCA-----GCTAACC           | 8 | Deletion               | 0.01   | -7  |
| CCTAccgt----TCGTCGCTAACC       | 8 | Insertion and Deletion | 0.0072 | 0   |
| CCTT-----CTAACC                | 8 | Deletion               | 0.0072 | -10 |
| CCTTAagG----GTCGCTAACC         | 8 | Insertion and Deletion | 0.0072 | -2  |
| CTaacctggggcTTTCAGgCGTCGCTAACC | 8 | Insertion              | 0.0072 | 11  |
| CTATGG-----                    | 8 | Deletion               | 0.0072 | -14 |
| -----GCCAACC                   | 7 | Deletion               | 0.0063 | -13 |
| -----TCGCCATCC                 | 7 | Deletion               | 0.0063 | -11 |
| -----CGTAtGCGGATC              | 7 | Insertion and Deletion | 0.0063 | -8  |
| -----ACGTCGCTAACC              | 7 | Deletion               | 0.0063 | -8  |
| -----TAcGTCGCTAACC             | 7 | Insertion and Deletion | 0.0063 | -7  |
| -----ATATCGTCGCTAACC           | 7 | Deletion               | 0.0063 | -5  |
| -----GCTTCGTCGCTAACC           | 7 | Deletion               | 0.0063 | -5  |
| -----GTATCGTCGCTAACC           | 7 | Deletion               | 0.0063 | -5  |
| -----TCATCGTCGCTAACC           | 7 | Deletion               | 0.0063 | -5  |
| ----GGCATCG-----               | 7 | Deletion               | 0.0063 | -13 |
| ----GGCGTCGTCGCTAACC           | 7 | Deletion               | 0.0063 | -4  |
| ----GGTATCGTCGCTAACC           | 7 | Deletion               | 0.0063 | -4  |
| ---TAGCGCCGTCGCTAACC           | 7 | Deletion               | 0.0063 | -3  |
| --AAGGCTaTC-ACGCTATCC          | 7 | Insertion and Deletion | 0.0063 | -2  |
| --TT--CACCGT-----              | 7 | Deletion               | 0.0063 | -12 |
| -CTAtG-----CGCTAACC            | 7 | Insertion and Deletion | 0.0063 | -7  |
| -CTTG-----GTCGCTAACC           | 7 | Deletion               | 0.0063 | -6  |
| CC-----GCGCTAACC               | 7 | Deletion               | 0.0063 | -9  |
| CC-----TCGGCGCTAACC            | 7 | Deletion               | 0.0063 | -6  |
| CCAtccgctaTGGCATCGTCGCTAACC    | 7 | Insertion              | 0.0063 | 7   |
| CCT-----ATAACC                 | 7 | Deletion               | 0.0063 | -11 |
| CCT----ATAGTCGCTAACC           | 7 | Deletion               | 0.0063 | -4  |
| CCT----CTCGTCGCTAACC           | 7 | Deletion               | 0.0063 | -4  |
| CCTcgtCGGCATCGTCGCTAACC        | 7 | Insertion              | 0.0063 | 3   |
| CCTGcgGGCATCGTCGCTAACC         | 7 | Insertion              | 0.0063 | 2   |
| CTaac--GCCAACGgTCGCTAACC       | 7 | Insertion and Deletion | 0.0063 | 2   |
| -----TA--T                     | 6 | Deletion               | 0.0054 | -17 |
| -----TCGCCAACC                 | 6 | Deletion               | 0.0054 | -11 |
| -----TATGGCTA---               | 6 | Deletion               | 0.0054 | -12 |

|                             |   |                        |        |     |
|-----------------------------|---|------------------------|--------|-----|
| -----TGGTC-----             | 6 | Deletion               | 0.0054 | -15 |
| -----ACCGTCGCTAACC          | 6 | Deletion               | 0.0054 | -7  |
| -----AAAAGTCGGGAACC         | 6 | Deletion               | 0.0054 | -6  |
| -----TATAAc-TCGCTAACC       | 6 | Insertion and Deletion | 0.0054 | -5  |
| -----GCAGCGTCGCTAACC        | 6 | Deletion               | 0.0054 | -5  |
| ----GGCATCGTCACTAACC        | 6 | Deletion               | 0.0054 | -4  |
| ---CAGCATCGTCGCTAACC        | 6 | Deletion               | 0.0054 | -3  |
| ---TGGCGgTTGTCGCTAACC       | 6 | Insertion and Deletion | 0.0054 | -2  |
| -ATTCaGCATCGTCGCTAACC       | 6 | Insertion and Deletion | 0.0054 | 0   |
| AC---ACATCGTCGCTAACC        | 6 | Deletion               | 0.0054 | -3  |
| C-----CGC--ACC              | 6 | Deletion               | 0.0054 | -13 |
| C-----CGCCACTAACC           | 6 | Deletion               | 0.0054 | -8  |
| CAC---GCATCGTCGCTAACC       | 6 | Insertion and Deletion | 0.0054 | -2  |
| CC-----AACC                 | 6 | Deletion               | 0.0054 | -14 |
| CC-----GGTCGCTAACC          | 6 | Deletion               | 0.0054 | -7  |
| CC----CA-----GCCAACC        | 6 | Deletion               | 0.0054 | -9  |
| CC-TAACATCGTCGCTAACC        | 6 | Deletion               | 0.0054 | -1  |
| CCCTCGctaacATCGTCGCTAACC    | 6 | Insertion              | 0.0054 | 4   |
| CCgcTATGCATCGTCGCTAACC      | 6 | Insertion              | 0.0054 | 2   |
| CCT----AAC--CGCTAACC        | 6 | Deletion               | 0.0054 | -6  |
| CCT---CA-----GCTAACC        | 6 | Deletion               | 0.0054 | -8  |
| CCT---CCaaTCGTCGCTAACC      | 6 | Insertion and Deletion | 0.0054 | -1  |
| CCTAccGCCATCGTCGCTAACC      | 6 | Insertion              | 0.0054 | 2   |
| CCTAccgccgt-ACATCGTCGCTAACC | 6 | Insertion and Deletion | 0.0054 | 6   |
| CCTcgtCGGTATCGTCGCTAACC     | 6 | Insertion              | 0.0054 | 3   |
| CCTT-----TAACC              | 6 | Deletion               | 0.0054 | -11 |
| CCTTAgcGCATCGTCGCTAACC      | 6 | Insertion              | 0.0054 | 2   |
| -----CT---C                 | 5 | Deletion               | 0.0045 | -17 |
| -----ACTAACC                | 5 | Deletion               | 0.0045 | -13 |
| -----CGCCAACC               | 5 | Deletion               | 0.0045 | -12 |
| -----CGCTAACccgccccC        | 5 | Insertion and Deletion | 0.0045 | -5  |
| -----CGCTACCC               | 5 | Deletion               | 0.0045 | -12 |
| -----CGCTGACC               | 5 | Deletion               | 0.0045 | -12 |
| -----CTCGTCGCTAACC          | 5 | Deletion               | 0.0045 | -7  |
| -----AAAGGTCGCTAACC         | 5 | Deletion               | 0.0045 | -6  |
| -----CAACGgTCGCTAACC        | 5 | Insertion and Deletion | 0.0045 | -5  |
| -----CATAACCGCTAACC         | 5 | Deletion               | 0.0045 | -6  |
| -----CGTCGTCGCTAACC         | 5 | Deletion               | 0.0045 | -6  |
| -----TATGGT-----            | 5 | Deletion               | 0.0045 | -14 |
| -----TATGGTCGCTAACC         | 5 | Deletion               | 0.0045 | -6  |
| -----CCATCGTCGCTAACC        | 5 | Deletion               | 0.0045 | -5  |
| -----GCATCGTCGCCAACC        | 5 | Deletion               | 0.0045 | -5  |
| -----GCATCGTCGCTACCC        | 5 | Deletion               | 0.0045 | -5  |
| -----GCATCGTCTCTAACC        | 5 | Deletion               | 0.0045 | -5  |

|                                 |   |                        |        |     |
|---------------------------------|---|------------------------|--------|-----|
| ----GGCACCGTCGCTAACC            | 5 | Deletion               | 0.0045 | -4  |
| ----GGCATCGACGCTAACC            | 5 | Deletion               | 0.0045 | -4  |
| ---ATGCATCGTCGCTAACC            | 5 | Deletion               | 0.0045 | -3  |
| ---TAGCATCGTCGCTAACC            | 5 | Deletion               | 0.0045 | -3  |
| ---TGCCATAG-CGCTAACC            | 5 | Deletion               | 0.0045 | -4  |
| ---TGG----GTCGCTAACC            | 5 | Deletion               | 0.0045 | -7  |
| --ATGCCATTGTAttttgtatccGAT----  | 5 | Insertion and Deletion | 0.0045 | 4   |
| --TTAGC-----                    | 5 | Deletion               | 0.0045 | -15 |
| -CTAtGGCATCGTCGCTAACC           | 5 | Insertion and Deletion | 0.0045 | 0   |
| AC--GGCATCGTCGCTAACC            | 5 | Deletion               | 0.0045 | -2  |
| C-----AGaCC                     | 5 | Insertion and Deletion | 0.0045 | -14 |
| C-----TCGCTATCC                 | 5 | Deletion               | 0.0045 | -10 |
| C-----AGACGAT----               | 5 | Deletion               | 0.0045 | -12 |
| C-----CATCGCTAACC               | 5 | Deletion               | 0.0045 | -8  |
| C-----CGTC-----                 | 5 | Deletion               | 0.0045 | -15 |
| C----GGATCGTCGCTAACC            | 5 | Deletion               | 0.0045 | -4  |
| C---GGCAT-----                  | 5 | Deletion               | 0.0045 | -14 |
| CC-----CCGTCGCTAACC             | 5 | Deletion               | 0.0045 | -6  |
| CC-----GCGTCGCTAACC             | 5 | Deletion               | 0.0045 | -6  |
| CC-----TCGCCGCTAACC             | 5 | Deletion               | 0.0045 | -6  |
| CC---GTACCGTCGCTAACC            | 5 | Deletion               | 0.0045 | -3  |
| CCATCcgctatggcggGCATCGTCGCTAACC | 5 | Insertion              | 0.0045 | 11  |
| CCT-----GGCGCTAACC              | 5 | Deletion               | 0.0045 | -7  |
| CCT-----TCGCCGCTAACC            | 5 | Deletion               | 0.0045 | -5  |
| CCT---AACCGTCGCTAACC            | 5 | Deletion               | 0.0045 | -3  |
| CCTActG--ATCGTCGCTAACC          | 5 | Insertion and Deletion | 0.0045 | 0   |
| CCTCatGGCATCGTCGCTAACC          | 5 | Insertion              | 0.0045 | 2   |
| CCTGgcatagtGGCATCGTCGCTAACC     | 5 | Insertion              | 0.0045 | 7   |
| CCTT-----CA                     | 5 | Deletion               | 0.0045 | -14 |
| CCTT-----CC                     | 5 | Deletion               | 0.0045 | -14 |
| CCTTG--ATCGTCGCTAACC            | 5 | Deletion               | 0.0045 | -2  |
| CCTTGCCA-----CTAACC             | 5 | Deletion               | 0.0045 | -6  |
| CTaacgcT---AACCGTCGCTAACC       | 5 | Insertion and Deletion | 0.0045 | 2   |
| CTAT-----GTCGCTAACC             | 5 | Deletion               | 0.0045 | -6  |
| CTAT---AT-GTCGCTAACC            | 5 | Deletion               | 0.0045 | -4  |
| CTATGgcgGCATCGTCGCTAACC         | 5 | Insertion              | 0.0045 | 3   |
| GCTAtggcGGCATCGTCGCTAACC        | 5 | Insertion              | 0.0045 | 4   |
| TCGCGG-ATCGTCGCTAACC            | 5 | Deletion               | 0.0045 | -1  |

1. Sequences are listed as the anti-sense strand. Deletions are represented as dashes (-) and insertions are lower-case.
2. Total reads = 109,903.

| <b>Table S5. ddPCR analysis of cage trial G<sub>2</sub> tear phenotypes.</b>                                                                                                        |                |
|-------------------------------------------------------------------------------------------------------------------------------------------------------------------------------------|----------------|
| <b>Sample</b>                                                                                                                                                                       | <b>Indel %</b> |
| Wild Type (pool)                                                                                                                                                                    | 0.217          |
| Wild Type (single) - 1                                                                                                                                                              | 0.189          |
| Wild Type (single) - 2                                                                                                                                                              | 0.271          |
| Tear (pool)                                                                                                                                                                         | 22.6           |
| Tear (single) - 1                                                                                                                                                                   | 10.8           |
| Tear (single) - 2                                                                                                                                                                   | 16.1           |
| Tear (single) - 3                                                                                                                                                                   | 35.8           |
| Tear (single) - 4                                                                                                                                                                   | 30.6           |
| Tear (single) - 5                                                                                                                                                                   | 47.5           |
| Tear (single) - 6                                                                                                                                                                   | 2.21           |
| Tear (single) - 7                                                                                                                                                                   | 3.53           |
| Tear (single) - 8                                                                                                                                                                   | 30.2           |
| Tear (single) - 9                                                                                                                                                                   | 7.43           |
| Tear (single) - 10                                                                                                                                                                  | 15.7           |
| 10 tear individuals and a single pool of 5 were analyzed by ddPCR for fractional abundance of indel alleles. Wild-type samples serve as controls, containing minimal indel alleles. |                |



| Table S6. Tear intercrosses.                                                                                                                                                                                             |                                |                      |                                                                               |                      |         |                                |
|--------------------------------------------------------------------------------------------------------------------------------------------------------------------------------------------------------------------------|--------------------------------|----------------------|-------------------------------------------------------------------------------|----------------------|---------|--------------------------------|
| General phenotype screening (a)                                                                                                                                                                                          |                                |                      |                                                                               |                      |         |                                |
| Replicate                                                                                                                                                                                                                | CFP <sup>+</sup> /cd           | CFP <sup>+</sup> /WT | CFP <sup>-</sup> /cd                                                          | CFP <sup>-</sup> /WT | Drive % | G <sub>0</sub> indel average % |
| IX-1                                                                                                                                                                                                                     | 328                            | 4                    | 0                                                                             | 0                    | 100.0   | 16.02                          |
| IX-2                                                                                                                                                                                                                     | 360                            | 55                   | 0                                                                             | 1                    | 99.76   | 6.03                           |
| IX-3                                                                                                                                                                                                                     | 326                            | 11                   | 0                                                                             | 0                    | 100.0   | 9.47                           |
| IX-4                                                                                                                                                                                                                     | 495                            | 11                   | 0                                                                             | 0                    | 100.0   | 11.9                           |
| <b>Total</b>                                                                                                                                                                                                             | 1509                           | 81                   | 0                                                                             | 1                    | 99.99   | 10.55                          |
| Hemizygous sequencing (b)                                                                                                                                                                                                |                                |                      |                                                                               |                      |         |                                |
| Replicate                                                                                                                                                                                                                | CFP <sup>+</sup> /WT sequenced | Indels/SNPs          | Sequence change 5' – 3'<br>WT: <u>GGTTAGCGACGATGCCAAGGCCG</u>                 |                      |         |                                |
| IX-1                                                                                                                                                                                                                     | 4                              | 0/0                  | all WT                                                                        |                      |         |                                |
| IX-2                                                                                                                                                                                                                     | 40                             | 7/13                 | GGTTAGCGACGAT----- <u>GCCG</u> Indel<br>GGTTAGCGACGAT <b>AGCG</b> AGGCCG SNPs |                      |         |                                |
| IX-3                                                                                                                                                                                                                     | 9                              | 3/0                  | GGTTAGCGACGAT----- <u>GCCG</u> (2)<br>GGTTAGCGACG----- <u>AGGCCG</u> (1)      |                      |         |                                |
| IX-4                                                                                                                                                                                                                     | 7                              | 3/0                  | GGTTAGCGACGAT----- <u>GCCG</u>                                                |                      |         |                                |
| Homozygous (cardinal) sequencing (c)                                                                                                                                                                                     |                                |                      |                                                                               |                      |         |                                |
| Replicate                                                                                                                                                                                                                | CFP <sup>+</sup> /cd screened  | Indels/SNPs          | Sequence change 5' – 3'<br>WT: <u>GGTTAGCGACGATGCCAAGGCCG</u>                 |                      |         |                                |
| IX-1                                                                                                                                                                                                                     | 50                             | 0/0                  | NA                                                                            |                      |         |                                |
| IX-2                                                                                                                                                                                                                     | 50                             | 1/0                  | GGTTAGCGACGATGC <b>Δ37</b> CGgaGA                                             |                      |         |                                |
| IX-3                                                                                                                                                                                                                     | 50                             | 0/0                  | NA                                                                            |                      |         |                                |
| IX-4                                                                                                                                                                                                                     | 50                             | 0/0                  | NA                                                                            |                      |         |                                |
| (a) General phenotype and genotype data.                                                                                                                                                                                 |                                |                      |                                                                               |                      |         |                                |
| (b) Sequencing results from CFP <sup>+</sup> /WT individuals found. All non-indel alleles are either WT or possess SNPs (bold letters). The wild-type gRNA target and PAM sequence are shown with the latter underlined. |                                |                      |                                                                               |                      |         |                                |
| (c) 50 CFP <sup>+</sup> /cd individuals were screened by the ddPCR method from each replicate, any indel individual identified was sequenced. Δ37 is a 37 bp deletion. Lower-case nucleotides are insertions.            |                                |                      |                                                                               |                      |         |                                |

**Table S7. Comparisons of life parameters of wild-type and AgNosCd-1 mosquitoes.**

| Line <sup>1</sup>                           | Wild-type                           | AgNosCd-1 (OX)                     | AgNosCd-1 (IX)                       |
|---------------------------------------------|-------------------------------------|------------------------------------|--------------------------------------|
| Larval development in days <sup>2</sup>     | 2.71 ± 0.12 (N=561)                 | 2.72 ± 0.09 (N=561)                | 2.70 ± 0.35 (N=539)                  |
| Pupal development time in days <sup>2</sup> | 6.11 ± 1.07 (N=479)                 | 5.76 ± 0.74 (N=512)                | 5.99 ± 1.51 (N=476)                  |
| Larval viability                            | 0.82 ± 0.12 (N=600)                 | 0.85 ± 0.12 (N=600)                | 0.81 ± 0.16 (N=600)                  |
| Percent female adults <sup>3</sup>          | 43.0 ± 5.93 (43.0%) (N=237)         | 42.8 ± 7.22 (39.6%) (N=234)        | 39.7 ± 8.47 (42.8%) (N=201)          |
| Percent male adults <sup>3</sup>            | 49.2 ± 4.49 (49.1%) (N=261)         | 49.8 ± 5.03 (52.3%) (N=251)        | 52.3 ± 4.67 (49.8%) (N=223)          |
| Adult female longevity in days ± SE         | 19.8 ± 0.97 (N=50)                  | 23.0 ± 1.03 (N=45)                 | 17.5 ± 1.04 (N=49)                   |
| Adult male longevity in days ± SE           | 23.9 ± 1.05 (N=49)                  | 23.6 ± 1.12 (N=47)                 | 23.0 ± 1.10 (N=49)                   |
| Fecundity <sup>4</sup>                      | 71.8 ± 3.5                          | 75.9 ± 3.8 *                       | 65.3 ± 2.9                           |
|                                             | (91; 4-171) (11)                    | (66; 1-128) (13)                   | (118; 1-171) (18)                    |
| Fertility (Egg hatchability) <sup>5</sup>   | 0.47 ± 0.03                         | 0.71 ± 0.04 ***                    | 0.52 ± 0.03                          |
|                                             | (5,932; 0 - 1)                      | (4,883; 0 - 1)                     | (5,271; 0 - 0.99)                    |
| OX Male contribution <sup>6</sup> (N=4)     | 51.9% ± 2.8% (OX)<br>(2901/5623)*   | 48.1% ± 2.8% (N=4)<br>(2722/5623)* | ---                                  |
| IX Male contribution <sup>6</sup> (N=5)     | 57.9% ± 3.8% (IX)<br>(4084/7023)*** | ---                                | 42.1% ± 3.8% (N=5)<br>(2939/7023)*** |

1. 'Line' refers to the control (wild-type G3) and transgenic (AgNosCd-1) mosquitoes that carry one (OX, outcross) or two (IX, intercross) copies of the transgenes.

2. Number of days to complete each instar stage (larval development), number of days for L2 larvae to reach pupal stage (pupal development). N = number of mosquitoes counted.

3. Sex was scored when adults emerged following seeding 100 larvae in each of 6 pans per line. Number of males and females do not add up to 100 due to larval and pupal mortality. N = number of mosquitoes counted.

4. Mean number of eggs per female ± standard error (SE) in the first gonotrophic cycle. The numbers in the first parentheses are the total number of mosquitoes counted followed by the range in numbers of fecundity. Females that did not lay eggs were excluded from the calculation. The numbers in the second parentheses are the number of females that died during the experiment.

5. Average fraction of deposited eggs that hatched. The numbers in parentheses are the total number of eggs observed followed by the range of hatchability (0, no eggs hatching; 1, all eggs hatching).

6. Values represent percentage of offspring in a single generation with (AgNosCd-1) or without (wild-type) a fluorescent marker in the results of a mating event where 150 wild-type females were provided an equal ratio of 75 wild-type and 75 AgNosCd-1 males. N = number of repetitions, numbers in parentheses are total CFP<sup>2</sup>/wild-type first generation progeny. OX males are expected to have 98% drive and IX males are expected to be 100% homozygous for the drive construct.

\* P < 0.05; \*\* P < 0.01; \*\*\* P < 0.001.

**Table S8. Small cage trial data 1:1 ratio cage A-1.**

| Generation | Total population | Larvae CFP <sup>+</sup> (%) | Larvae CFP <sup>-</sup> (%) | Pupae and adults CFP <sup>+</sup> (%) |              |              |              |           |           | Pupae and adults (%) |              |      |        | Adults contributing to the next generation <sup>1</sup> |    |                  |    |         |       |
|------------|------------------|-----------------------------|-----------------------------|---------------------------------------|--------------|--------------|--------------|-----------|-----------|----------------------|--------------|------|--------|---------------------------------------------------------|----|------------------|----|---------|-------|
|            |                  |                             |                             | WT                                    |              | cd           |              | Tear eye  |           | WT                   |              | cd   |        | CFP <sup>+</sup>                                        |    | CFP <sup>-</sup> |    | Unknown | Total |
|            |                  |                             |                             | Male                                  | Female       | Male         | Female       | Male      | Female    | Male                 | Female       | Male | Female | WT                                                      | cd | WT               | cd |         |       |
| G0         | 300              | 75<br>25.0%                 | 225<br>75.0%                | 75<br>25.0%                           |              |              |              |           |           | 75<br>25.0%          | 150<br>50.0% |      |        | 50                                                      |    | 188              |    | 22      | 260   |
| G1         | 3573             | 333<br>56.4%                | 257<br>43.6%                | 149<br>28.3%                          | 137<br>26.0% |              |              |           |           | 127<br>24.1%         | 113<br>21.5% |      |        | 137                                                     |    | 96               |    | 1       | 234   |
| G2         | 2788             | 496<br>87.0%                | 74<br>13.0%                 | 124<br>23.3%                          | 127<br>23.8% | 110<br>20.6% | 100<br>18.8% | 2<br>0.4% |           | 32<br>6.0%           | 38<br>7.1%   |      |        | 201                                                     |    | 29               |    | 22      | 252   |
| G3         | 4760             | 484<br>95.8%                | 21<br>4.2%                  | 63<br>12.5%                           | 67<br>13.3%  | 177<br>35.0% | 159<br>31.5% | 9<br>1.8% | 9<br>1.8% | 7<br>1.4%            | 14<br>2.8%   |      |        | 187                                                     |    | 16               |    | 24      | 227   |
| G4         | 3863             | 596<br>100%                 |                             | 27<br>5.0%                            | 24<br>4.4%   | 248<br>45.6% | 245<br>45.0% |           |           |                      |              |      |        | 184                                                     |    |                  |    | 21      | 205   |
| G5         | 4926             | 477<br>100%                 |                             |                                       | 1<br>0.3%    | 206<br>51.8% | 191<br>48.0% |           |           |                      |              |      |        | 176                                                     |    |                  |    | 34      | 210   |
| G6         | 2548             | 471<br>100%                 |                             |                                       |              | 231<br>50.7% | 225<br>49.3% |           |           |                      |              |      |        | 243                                                     |    |                  |    | 16      | 259   |
| G7         | 4636             | 549<br>100%                 |                             |                                       |              | 241<br>47.1% | 271<br>52.9% |           |           |                      |              |      |        | 243                                                     |    |                  |    | 17      | 260   |
| G8         | 4983             | 559<br>100%                 |                             |                                       |              | 260<br>46.5% | 299<br>53.5% |           |           |                      |              |      |        | 168                                                     |    |                  |    | 24      | 192   |
| G9         | 2569             | 546<br>100%                 |                             |                                       |              | 265<br>48.5% | 281<br>51.5% |           |           |                      |              |      |        | 161                                                     |    |                  |    | 64      | 225   |
| G10        | 3757             | 515<br>100%                 |                             |                                       |              | 261<br>50.7% | 254<br>49.3% |           |           |                      |              |      |        | 147                                                     |    |                  |    | 15      | 162   |
| G11        | 4072             | 461<br>100%                 |                             |                                       |              | 267<br>57.9% | 194<br>42.1% |           |           |                      |              |      |        | 163                                                     |    |                  |    | 64      | 227   |
| TOTAL      | 42775            | 5562                        | 577                         |                                       |              |              |              |           |           |                      |              |      |        | 2060                                                    |    | 329              |    | 324     | 2713  |

1. Adults contributing to the next generation: total number of emerged males and females that survived when oviposition egg cups provided. Abbreviations: cd, cardinal (pale red-eye, positive +, negative-); CFP, cyan fluorescent protein (positive +, negative -); WT, wild-type eye color.

**Table S9. Small cage trial data 1:1 ratio cage A-2.**

| Generation   | Total population | Larvae CFP <sup>+</sup> (%) | Larvae CFP <sup>-</sup> (%) | Pupae and adults CFP <sup>+</sup> (%) |              |              |              |           |           | Pupae and adults (%) |              |      |        | Adults contributing to the next generation <sup>1</sup> |    |                  |    |            |             |
|--------------|------------------|-----------------------------|-----------------------------|---------------------------------------|--------------|--------------|--------------|-----------|-----------|----------------------|--------------|------|--------|---------------------------------------------------------|----|------------------|----|------------|-------------|
|              |                  |                             |                             | WT                                    |              | cd           |              | Tear eye  |           | WT                   |              | cd   |        | CFP <sup>+</sup>                                        |    | CFP <sup>-</sup> |    | Unknown    | Total       |
|              |                  |                             |                             | Male                                  | Female       | Male         | Female       | Male      | Female    | Male                 | Female       | Male | Female | WT                                                      | cd | WT               | cd |            |             |
| G0           | 300              | 75<br>25.0%                 | 225<br>75.0%                | 75<br>25.0%                           |              |              |              |           |           | 75<br>25.0%          | 150<br>50.0% |      |        | 48                                                      |    | 203              |    | 9          | 260         |
| G1           | 3914             | 305<br>60.5%                | 199<br>39.5%                | 120<br>26.3%                          | 146<br>31.9% |              |              |           |           | 89<br>19.5%          | 102<br>22.3% |      |        | 143                                                     |    | 82               |    | 2          | 227         |
| G2           | 3251             | 492<br>84.0%                | 94<br>16.0%                 | 139<br>25.2%                          | 130<br>23.6% | 93<br>16.9%  | 92<br>16.7%  | 1<br>0.2% | 9<br>1.6% | 41<br>7.4%           | 46<br>8.3%   |      |        | 175                                                     |    | 34               |    | 28         | 237         |
| G3           | 4713             | 468<br>93.8%                | 31<br>6.2%                  | 61<br>12.2%                           | 64<br>12.8%  | 131<br>26.3% | 202<br>40.5% | 2<br>0.4% | 8<br>1.6% | 18<br>3.6%           | 13<br>2.6%   |      |        | 171                                                     |    | 9                |    | 11         | 191         |
| G4           | 3620             | 602<br>99.7%                | 2<br>0.3%                   | 30<br>6.5%                            | 31<br>6.7%   | 194<br>42.2% | 200<br>43.5% | 4<br>0.9% | 1<br>0.2% |                      |              |      |        | 188                                                     |    |                  |    | 23         | 211         |
| G5           | 3440             | 501<br>100%                 |                             | 7<br>1.8%                             | 4<br>1.0%    | 181<br>45.3% | 204<br>51.0% | 2<br>0.5% | 2<br>0.5% |                      |              |      |        | 193                                                     |    |                  |    | 19         | 212         |
| G6           | 2590             | 452<br>100%                 |                             |                                       |              | 210<br>48.6% | 222<br>51.4% |           |           |                      |              |      |        | 167                                                     |    |                  |    | 28         | 195         |
| G7           | 3107             | 584<br>100%                 |                             |                                       |              | 262<br>47.1% | 294<br>52.9% |           |           |                      |              |      |        | 162                                                     |    |                  |    | 17         | 179         |
| G8           | 3092             | 540<br>100%                 |                             |                                       |              | 272<br>50.4% | 268<br>49.6% |           |           |                      |              |      |        | 181                                                     |    |                  |    | 53         | 234         |
| G9           | 3839             | 576<br>100%                 |                             |                                       |              | 285<br>49.5% | 291<br>50.5% |           |           |                      |              |      |        | 221                                                     |    |                  |    | 17         | 238         |
| G10          | 4175             | 502<br>100%                 |                             |                                       |              | 264<br>52.6% | 238<br>47.4% |           |           |                      |              |      |        | 156                                                     |    |                  |    | 55         | 211         |
| G11          | 2553             | 542<br>100%                 |                             |                                       |              | 267<br>49.3% | 275<br>50.7% |           |           |                      |              |      |        | 201                                                     |    |                  |    | 6          | 207         |
| <b>TOTAL</b> | <b>38594</b>     | <b>5639</b>                 | <b>551</b>                  |                                       |              |              |              |           |           |                      |              |      |        | <b>2006</b>                                             |    | <b>328</b>       |    | <b>268</b> | <b>2602</b> |

1. Adults contributing to the next generation: total number of emerged males and females that survived when oviposition egg cups provided. Abbreviations: cd, cardinal (pale red-eye, positive +, negative-); CFP, cyan fluorescent protein (positive +, negative -); WT, wild-type eye color.

**Table S10. Small cage trial data 1:1 ratio cage A-3.**

| Generation | Total population | Larvae CFP <sup>+</sup> (%) | Larvae CFP <sup>-</sup> (%) | Pupae and adults CFP <sup>+</sup> (%) |              |              |              |            |            | Pupae and adults (%) |              |              |        | Adults contributing to the next generation <sup>1</sup> |        |                  |     |         |       |      |
|------------|------------------|-----------------------------|-----------------------------|---------------------------------------|--------------|--------------|--------------|------------|------------|----------------------|--------------|--------------|--------|---------------------------------------------------------|--------|------------------|-----|---------|-------|------|
|            |                  |                             |                             | WT                                    |              | cd           |              | Tear eye   |            | WT                   |              | cd           |        | CFP <sup>+</sup>                                        |        | CFP <sup>-</sup> |     | Unknown | Total |      |
|            |                  |                             |                             | Male                                  | Female       | Male         | Female       | Male       | Female     | Male                 | Female       | Male         | Female | Male                                                    | Female | WT               | cd  |         |       | WT   |
| G0         | 300              | 75<br>25.0%                 | 225<br>75.0%                | 75<br>25.0%                           |              |              |              |            |            |                      | 75<br>25.0%  | 150<br>50.0% |        |                                                         | 42     |                  | 240 |         |       | 282  |
| G1         | 6444             | 175<br>31.5%                | 381<br>68.5%                | 74<br>14.7%                           | 93<br>18.5%  |              |              |            |            |                      | 155<br>30.9% | 180<br>35.9% |        |                                                         | 73     |                  | 168 |         |       | 241  |
| G2         | 3291             | 311<br>52.7%                | 279<br>47.3%                | 90<br>17.1%                           | 106<br>20.1% | 33<br>6.3%   | 40<br>7.6%   | 1<br>0.2%  | 9<br>1.7%  |                      | 122<br>23.1% | 126<br>23.9% |        |                                                         | 108    |                  | 107 |         | 26    | 241  |
| G3         | 3641             | 347<br>71.3%                | 140<br>28.7%                | 117<br>23.1%                          | 150<br>29.6% | 26<br>5.1%   | 45<br>8.9%   | 13<br>2.6% | 16<br>3.2% |                      | 95<br>18.7%  | 45<br>8.9%   |        |                                                         | 189    |                  | 33  |         | 13    | 235  |
| G4         | 4929             | 597<br>98.7%                | 8<br>1.3%                   | 59<br>12.2%                           | 68<br>14.0%  | 160<br>33.0% | 185<br>38.1% | 3<br>0.6%  | 2<br>0.4%  |                      | 3<br>0.6%    | 5<br>1.0%    |        |                                                         | 160    |                  | 5   |         | 17    | 182  |
| G5         | 2675             | 456<br>98.7%                | 6<br>1.3%                   | 7<br>1.9%                             | 9<br>2.5%    | 154<br>42.2% | 190<br>52.1% |            | 1<br>0.3%  |                      | 3<br>0.8%    | 1<br>0.3%    |        |                                                         | 164    |                  |     |         | 17    | 181  |
| G6         | 3084             | 441<br>100%                 |                             |                                       |              | 199<br>46.4% | 230<br>53.6% |            |            |                      |              |              |        |                                                         | 212    |                  |     |         | 43    | 255  |
| G7         | 6198             | 521<br>100%                 |                             |                                       |              | 246<br>49.5% | 251<br>50.5% |            |            |                      |              |              |        |                                                         | 263    |                  |     |         | 41    | 304  |
| G8         | 6129             | 532<br>100%                 |                             |                                       |              | 246<br>46.2% | 286<br>53.8% |            |            |                      |              |              |        |                                                         | 186    |                  |     |         | 42    | 228  |
| G9         | 3891             | 593<br>100%                 |                             |                                       |              | 277<br>46.7% | 316<br>53.3% |            |            |                      |              |              |        |                                                         | 202    |                  |     |         | 36    | 238  |
| G10        | 1945             | 546<br>100%                 |                             |                                       |              | 295<br>54.0% | 251<br>46.0% |            |            |                      |              |              |        |                                                         | 217    |                  |     |         | 9     | 226  |
| G11        | 3303             | 533<br>100%                 |                             |                                       |              | 277<br>52.0% | 256<br>48.0% |            |            |                      |              |              |        |                                                         | 199    |                  |     |         | 22    | 221  |
| TOTAL      | 45830            | 5127                        | 1039                        |                                       |              |              |              |            |            |                      |              |              |        |                                                         | 2015   |                  | 553 |         | 266   | 2834 |

1. Adults contributing to the next generation: total number of emerged males and females that survived when oviposition egg cups provided. Abbreviations: cd, cardinal (pale red-eye, positive +, negative-); CFP, cyan fluorescent protein (positive +, negative -); WT, wild-type eye color.

**Table S11. Small cage trial data 1:3 ratio cage B-1.**

| Generation | Total population | Larvae CFP <sup>+</sup> (%) | Larvae CFP <sup>-</sup> (%) | Pupae and adults CFP <sup>+</sup> (%) |              |              |              |           |            | Pupae and adults (%) |              |              |        | Adults contributing to the next generation <sup>1</sup> |        |                  |     |         |       |      |
|------------|------------------|-----------------------------|-----------------------------|---------------------------------------|--------------|--------------|--------------|-----------|------------|----------------------|--------------|--------------|--------|---------------------------------------------------------|--------|------------------|-----|---------|-------|------|
|            |                  |                             |                             | WT                                    |              | cd           |              | Tear eye  |            | WT                   |              | cd           |        | CFP <sup>+</sup>                                        |        | CFP <sup>-</sup> |     | Unknown | Total |      |
|            |                  |                             |                             | Male                                  | Female       | Male         | Female       | Male      | Female     | Male                 | Female       | Male         | Female | Male                                                    | Female | WT               | cd  |         |       | WT   |
| G0         | 300              | 37<br>12.4%                 | 261<br>87.6%                | 37<br>12.4%                           |              |              |              |           |            |                      | 111<br>37.2% | 150<br>50.3% |        |                                                         | 21     |                  | 223 |         | 4     | 248  |
| G1         | 3507             | 31<br>6.5%                  | 443<br>93.5%                | 15<br>2.8%                            | 16<br>3.0%   |              |              |           |            |                      | 225<br>42.6% | 272<br>51.5% |        |                                                         | 26     |                  | 220 |         |       | 246  |
| G2         | 3366             | 100<br>19.7%                | 408<br>80.3%                | 47<br>9.7%                            | 44<br>9.1%   | 4<br>0.8%    | 4<br>0.8%    |           | 2<br>0.4%  |                      | 171<br>35.4% | 211<br>43.7% |        |                                                         | 47     |                  | 111 |         | 20    | 178  |
| G3         | 3977             | 216<br>43.9%                | 276<br>56.1%                | 84<br>17.1%                           | 78<br>15.9%  | 24<br>4.9%   | 28<br>5.7%   | 1<br>0.2% | 1<br>0.2%  |                      | 135<br>27.4% | 141<br>28.7% |        |                                                         | 87     |                  | 123 |         | 39    | 249  |
| G4         | 3540             | 381<br>63.2%                | 222<br>36.8%                | 130<br>25.9%                          | 121<br>24.2% | 20<br>4.0%   | 30<br>6.0%   | 5<br>1.0% | 21<br>4.2% |                      | 97<br>19.4%  | 77<br>15.4%  |        |                                                         | 105    |                  | 122 |         | 13    | 240  |
| G5         | 4443             | 523<br>82.9%                | 108<br>17.1%                | 104<br>20.1%                          | 103<br>19.9% | 98<br>19.0%  | 106<br>20.5% | 4<br>0.8% | 13<br>2.5% |                      | 46<br>8.9%   | 43<br>8.3%   |        |                                                         | 166    |                  | 25  |         | 10    | 201  |
| G6         | 2442             | 511<br>98.6%                | 7<br>1.4%                   | 48<br>10.6%                           | 48<br>10.6%  | 164<br>36.4% | 177<br>39.2% | 4<br>0.9% | 3<br>0.7%  |                      | 3<br>0.7%    | 4<br>0.9%    |        |                                                         | 202    |                  |     |         | 14    | 216  |
| G7         | 4764             | 573<br>100%                 |                             | 3<br>0.6%                             | 8<br>1.6%    | 233<br>46.0% | 262<br>51.8% |           |            |                      |              |              |        |                                                         | 174    |                  | 4   |         | 29    | 207  |
| G8         | 3789             | 496<br>100%                 |                             | 1<br>0.2%                             | 1<br>0.2%    | 240<br>48.4% | 254<br>51.2% |           |            |                      |              |              |        |                                                         | 172    |                  |     |         | 34    | 206  |
| G9         | 1374             | 497<br>100%                 |                             |                                       |              | 265<br>53%   | 232<br>47%   |           |            |                      |              |              |        |                                                         | 113    |                  |     |         | 64    | 177  |
| G10        | 3302             | 516<br>100%                 |                             |                                       |              | 261<br>51%   | 255<br>49%   |           |            |                      |              |              |        |                                                         | 195    |                  |     |         | 18    | 213  |
| G11        | 1545             | 542<br>100%                 |                             |                                       |              | 269<br>50%   | 273<br>50%   |           |            |                      |              |              |        |                                                         | 204    |                  |     |         | 11    | 215  |
| Total      | 36349            | 4423                        | 1725                        |                                       |              |              |              |           |            |                      |              |              |        |                                                         | 1512   |                  | 828 |         | 256   | 2596 |

1. Adults contributing to the next generation: total number of emerged males and females that survived when oviposition egg cups provided. Abbreviations: cd, cardinal (pale red-eye, positive +, negative-); CFP, cyan fluorescent protein (positive +, negative -); WT, wild-type eye color.

**Table S12. Small cage trial data 1:3 ratio cage B-2**

| Generation | Total population | Larvae CFP <sup>+</sup> (%) | Larvae CFP <sup>-</sup> (%) | Pupae and adults CFP <sup>+</sup> (%) |             |              |              |            |            | Pupae and adults (%) |              |      |        | Adults contributing to the next generation <sup>1</sup> |        |                  |    |         |       |
|------------|------------------|-----------------------------|-----------------------------|---------------------------------------|-------------|--------------|--------------|------------|------------|----------------------|--------------|------|--------|---------------------------------------------------------|--------|------------------|----|---------|-------|
|            |                  |                             |                             | WT                                    |             | cd           |              | Tear eye   |            | WT                   |              | cd   |        | CFP <sup>+</sup>                                        |        | CFP <sup>-</sup> |    | Unknown | Total |
|            |                  |                             |                             | Male                                  | Female      | Male         | Female       | Male       | Female     | Male                 | Female       | Male | Female | Male                                                    | Female | WT               | cd |         |       |
| G0         | 300              | 37<br>12.4%                 | 261<br>87.6%                | 37<br>12.4%                           |             |              |              |            |            | 111<br>37.2%         | 150<br>50.3% |      |        | 27                                                      |        | 246              |    | 6       | 279   |
| G1         | 5156             | 55<br>9.5%                  | 525<br>90.5%                | 27<br>4.7%                            | 28<br>4.9%  |              |              |            |            | 264<br>46.3%         | 251<br>44.0% |      |        | 34                                                      |        | 217              |    | 1       | 252   |
| G2         | 3931             | 152<br>23.4%                | 498<br>76.6%                | 50<br>8.9%                            | 70<br>12.4% | 5<br>0.9%    |              | 1<br>0.2%  |            | 233<br>41.4%         | 204<br>36.2% |      |        | 52                                                      |        | 177              |    | 32      | 261   |
| G3         | 5416             | 232<br>38.5%                | 370<br>61.5%                | 81<br>15.3%                           | 90<br>17.0% | 10<br>1.9%   | 13<br>2.5%   | 1<br>0.2%  | 4<br>0.8%  | 168<br>31.7%         | 163<br>30.8% |      |        | 82                                                      |        | 148              |    | 18      | 248   |
| G4         | 2392             | 302<br>59.6%                | 205<br>40.4%                | 78<br>20.7%                           | 87<br>23.1% | 23<br>6.1%   | 24<br>6.4%   | 5<br>1.3%  | 5<br>1.3%  | 80<br>21.3%          | 74<br>19.7%  |      |        | 78                                                      |        | 51               |    | 2       | 131   |
| G5         | 2905             | 462<br>82.2%                | 100<br>17.8%                | 86<br>17.2%                           | 95<br>19.0% | 88<br>17.6%  | 122<br>24.4% | 7<br>1.4%  | 12<br>2.4% | 43<br>8.6%           | 46<br>9.2%   |      |        | 120                                                     |        | 38               |    | 54      | 212   |
| G6         | 2994             | 572<br>92.7%                | 45<br>7.3%                  | 76<br>13.1%                           | 94<br>16.2% | 165<br>28.4% | 179<br>30.9% | 12<br>2.1% | 11<br>1.9% | 22<br>3.8%           | 21<br>3.6%   |      |        | 197                                                     |        | 10               |    | 62      | 269   |
| G7         | 6395             | 548<br>99.6%                | 2<br>0.4%                   | 9<br>1.8%                             | 17<br>3.3%  | 235<br>46.3% | 236<br>46.5% | 7<br>1.4%  | 2<br>0.4%  | 2<br>0.4%            |              |      |        | 207                                                     |        | 2                |    | 27      | 236   |
| G8         | 4712             | 542<br>100%                 |                             | 6<br>1.1%                             | 4<br>0.7%   | 274<br>50.6% | 252<br>46.5% |            | 6<br>1.1%  |                      |              |      |        | 198                                                     |        |                  |    | 43      | 241   |
| G9         | 2779             | 589<br>100%                 |                             | 1<br>0.2%                             | 2<br>0.3%   | 275<br>46.7% | 311<br>52.8% |            |            |                      |              |      |        | 224                                                     |        |                  |    | 21      | 245   |
| G10        | 3921             | 466<br>100%                 |                             | 7<br>1.5%                             |             | 222<br>47.6% | 237<br>50.9% |            |            |                      |              |      |        | 183                                                     |        |                  |    | 14      | 197   |
| G11        | 4254             | 542<br>99.8%                | 1<br>0.2%                   | 8<br>1.5%                             | 10<br>1.8%  | 255<br>47.0% | 269<br>49.5% |            |            |                      |              |      |        | 200                                                     |        | 23               |    |         | 223   |
| TOTAL      | 45155            | 4499                        | 2007                        |                                       |             |              |              |            |            |                      |              |      |        | 1602                                                    |        | 912              |    | 280     | 2794  |

1. Adults contributing to the next generation: total number of emerged males and females that survived when oviposition egg cups provided. Abbreviations: cd, cardinal (pale red-eye, positive +, negative-); CFP, cyan fluorescent protein (positive +, negative -); WT, wild-type eye color.

**Table S13. Small cage trial data 1:3 ratio cage B-3.**

| Generation | Total population | Larvae CFP <sup>+</sup> (%) | Larvae CFP <sup>-</sup> (%) | Pupae and adults CFP <sup>+</sup> (%) |              |              |              |            |            | Pupae and adults (%) |              |      |        | Adults contributing to the next generation <sup>1</sup> |        |                  |    |         |       |
|------------|------------------|-----------------------------|-----------------------------|---------------------------------------|--------------|--------------|--------------|------------|------------|----------------------|--------------|------|--------|---------------------------------------------------------|--------|------------------|----|---------|-------|
|            |                  |                             |                             | WT                                    |              | cd           |              | Tear eye   |            | WT                   |              | cd   |        | CFP <sup>+</sup>                                        |        | CFP <sup>-</sup> |    | Unknown | Total |
|            |                  |                             |                             | Male                                  | Female       | Male         | Female       | Male       | Female     | Male                 | Female       | Male | Female | Male                                                    | Female | WT               | cd |         |       |
| G0         | 300              | 37<br>12.4%                 | 261<br>87.6%                | 37<br>12.4%                           |              |              |              |            |            | 111<br>37.2%         | 150<br>50.3% |      |        | 27                                                      |        | 186              |    | 9       | 222   |
| G1         | 2901             | 24<br>4.7%                  | 484<br>95.3%                | 16<br>3.1%                            | 8<br>1.6%    |              |              |            |            | 228<br>44.9%         | 256<br>50.4% |      |        | 12                                                      |        | 212              |    | 4       | 228   |
| G2         | 3968             | 50<br>8.5%                  | 541<br>91.5%                | 16<br>2.9%                            | 22<br>3.9%   | 3<br>0.5%    | 7<br>1.3%    |            |            | 262<br>47.0%         | 247<br>44.3% |      |        | 17                                                      |        | 153              |    | 58      | 228   |
| G3         | 5477             | 80<br>18.1%                 | 363<br>81.9%                | 37<br>8.4%                            | 33<br>7.4%   | 4<br>0.9%    | 6<br>1.4%    |            |            | 177<br>40.0%         | 186<br>42.0% |      |        | 23                                                      |        | 166              |    | 31      | 220   |
| G4         | 3029             | 126<br>21.7%                | 455<br>78.3%                | 18<br>5.0%                            | 27<br>7.6%   | 2<br>0.6%    | 2<br>0.6%    | 1<br>0.3%  |            | 127<br>35.6%         | 180<br>50.4% |      |        | 20                                                      |        | 129              |    | 15      | 164   |
| G5         | 3602             | 66<br>12.0%                 | 482<br>88.0%                | 20<br>4.0%                            | 31<br>6.2%   | 4<br>0.8%    | 3<br>0.6%    |            | 3<br>0.6%  | 216<br>42.9%         | 227<br>45.0% |      |        | 75                                                      |        | 139              |    | 85      | 299   |
| G6         | 4809             | 1708<br>36.3%               | 3001<br>63.7%               | 61<br>13.9%                           | 58<br>13.2%  | 23<br>5.2%   | 24<br>5.5%   | 5<br>1.1%  | 4<br>0.9%  | 150<br>34.2%         | 114<br>26.0% |      |        | 57                                                      |        | 126              |    | 70      | 253   |
| G7         | 3520             | 2161<br>61.4%               | 1359<br>38.6%               | 109<br>20.2%                          | 103<br>19.1% | 39<br>7.2%   | 26<br>4.8%   | 17<br>3.1% | 16<br>3.0% | 109<br>20.2%         | 121<br>22.4% |      |        | 141                                                     |        | 35               |    | 26      | 202   |
| G8         | 3477             | 532<br>93.5%                | 37<br>6.5%                  | 87<br>15.3%                           | 110<br>19.3% | 165<br>29.0% | 159<br>27.9% | 4<br>0.7%  | 7<br>1.2%  | 18<br>3.2%           | 19<br>3.3%   |      |        | 154                                                     |        | 16               |    | 48      | 218   |
| G9         | 3027             | 610<br>99.2%                | 5<br>0.8%                   | 49<br>8.0%                            | 46<br>7.5%   | 229<br>37.2% | 265<br>43.1% | 13<br>2.1% | 8<br>1.3%  | 1<br>0.2%            | 4<br>0.7%    |      |        | 225                                                     |        |                  |    | 15      | 240   |
| G10        | 2663             | 637<br>100%                 |                             | 1<br>0.2%                             |              | 339<br>53.2% | 297<br>46.6% |            |            |                      |              |      |        | 204                                                     |        |                  |    | 15      | 219   |
| G11        | 3399             | 561<br>100%                 |                             |                                       |              | 265<br>47.2% | 296<br>52.8% |            |            |                      |              |      |        | 214                                                     |        |                  |    | 18      | 232   |
| TOTAL      | 40172            | 6592                        | 6988                        |                                       |              |              |              |            |            |                      |              |      |        | 1169                                                    |        | 1162             |    | 394     | 2725  |

1. Adults contributing to the next generation: total number of emerged males and females that survived when oviposition egg cups provided. Abbreviations: cd, cardinal (pale red-eye, positive +, negative-); CFP, cyan fluorescent protein (positive +, negative -); WT, wild-type eye color.



**Table S14. Small cage trial data 1:9 ratio cage C-1.**

| Generation | Total population | Larvae CFP <sup>+</sup> (%) | Larvae CFP <sup>-</sup> (%) | Pupae and adults CFP <sup>+</sup> (%) |              |              |              |           |           | Pupae and adults (%) |              |      |        | Adults contributing to the next generation <sup>1</sup> |        |                  |    |         |       |
|------------|------------------|-----------------------------|-----------------------------|---------------------------------------|--------------|--------------|--------------|-----------|-----------|----------------------|--------------|------|--------|---------------------------------------------------------|--------|------------------|----|---------|-------|
|            |                  |                             |                             | WT                                    |              | cd           |              | Tear eye  |           | WT                   |              | cd   |        | CFP <sup>+</sup>                                        |        | CFP <sup>-</sup> |    | Unknown | Total |
|            |                  |                             |                             | Male                                  | Female       | Male         | Female       | Male      | Female    | Male                 | Female       | Male | Female | Male                                                    | Female | WT               | cd |         |       |
| G0         | 300              | 15<br>5.0%                  | 285<br>95.0%                | 15<br>5.0%                            |              |              |              |           |           | 135<br>45.0%         | 150<br>50.0% |      |        | 13                                                      |        | 259              |    | 6       | 278   |
| G1         | 5574             | 370<br>6.6%                 | 5204<br>93.4%               | 32<br>6.1%                            | 15<br>2.8%   |              |              |           |           | 266<br>50.4%         | 215<br>40.7% |      |        | 22                                                      |        | 235              |    |         | 257   |
| G2         | 4999             | 769<br>15.4%                | 4230<br>84.6%               | 36<br>6.3%                            | 50<br>8.7%   |              |              |           | 2         | 248<br>43.1%         | 239<br>41.6% |      |        | 39                                                      |        | 153              |    | 75      | 267   |
| G3         | 5426             | 1761<br>32.5%               | 3665<br>67.5%               | 61<br>13.1%                           | 59<br>12.7%  |              | 11<br>2.4%   | 3<br>0.6% | 5<br>1.1% | 168<br>36.2%         | 157<br>33.8% |      |        | 49                                                      |        | 141              |    | 23      | 213   |
| G4         | 4273             | 335<br>55.6%                | 267<br>44.4%                | 138<br>26.4%                          | 109<br>20.9% | 15<br>2.9%   | 21<br>4.0%   | 6<br>1.1% | 3<br>0.6% | 118<br>22.6%         | 112<br>21.5% |      |        | 133                                                     |        | 83               |    | 28      | 244   |
| G5         | 4513             | 442<br>81.0%                | 104<br>19.0%                | 126<br>24.9%                          | 127<br>25.1% | 71<br>14.0%  | 80<br>15.8%  | 1<br>0.2% | 6<br>1.2% | 39<br>7.7%           | 56<br>11.1%  |      |        | 164                                                     |        | 37               |    | 10      | 211   |
| G6         | 3012             | 548<br>98.6%                | 8<br>1.4%                   | 106<br>20.0%                          | 88<br>16.6%  | 162<br>30.6% | 161<br>30.4% | 4<br>0.8% | 3<br>0.6% | 3<br>0.6%            | 3<br>0.6%    |      |        | 253                                                     |        | 2                |    | 20      | 275   |
| G7         | 6148             | 561<br>100%                 |                             | 6<br>1.1%                             | 11<br>2.1%   | 254<br>47.8% | 259<br>48.8% |           | 1<br>0.2% |                      |              |      |        | 201                                                     |        | 2                |    | 20      | 223   |
| G8         | 5490             | 552<br>100%                 |                             | 2<br>0.4%                             | 3<br>0.5%    | 274<br>49.6% | 273<br>49.5% |           |           |                      |              |      |        | 148                                                     |        |                  |    | 52      | 200   |
| G9         | 3956             | 568<br>100%                 |                             |                                       |              | 285<br>50.2% | 283<br>49.8% |           |           |                      |              |      |        | 157                                                     |        |                  |    | 79      | 236   |
| G10        | 2336             | 585<br>100%                 |                             |                                       |              | 301<br>51.5% | 284<br>48.5% |           |           |                      |              |      |        | 202                                                     |        |                  |    | 21      | 223   |
| G11        | 3710             | 502<br>100%                 |                             |                                       |              | 249<br>49.6% | 253<br>50.4% |           |           |                      |              |      |        | 190                                                     |        | 19               |    |         | 209   |
| TOTAL      | 49737            | 7008                        | 13763                       |                                       |              |              |              |           |           |                      |              |      |        | 1571                                                    |        | 931              |    | 334     | 2836  |

1. Adults contributing to the next generation: total number of emerged males and females that survived when oviposition egg cups provided. Abbreviations: cd, cardinal (pale red-eye, positive +, negative-); CFP, cyan fluorescent protein (positive +, negative -); WT, wild-type eye color.

**Table S15. Small cage trial data 1:9 ratio cage C-2.**

| Generation   | Total population | Larvae CFP <sup>+</sup> (%) | Larvae CFP <sup>-</sup> (%) | Pupae and adults CFP <sup>+</sup> (%) |              |              |              |            |            | Pupae and adults (%) |              |              |        | Adults contributing to the next generation <sup>1</sup> |             |                  |            |         |            |             |
|--------------|------------------|-----------------------------|-----------------------------|---------------------------------------|--------------|--------------|--------------|------------|------------|----------------------|--------------|--------------|--------|---------------------------------------------------------|-------------|------------------|------------|---------|------------|-------------|
|              |                  |                             |                             | WT                                    |              | cd           |              | Tear eye   |            | WT                   |              | cd           |        | CFP <sup>+</sup>                                        |             | CFP <sup>-</sup> |            | Unknown | Total      |             |
|              |                  |                             |                             | Male                                  | Female       | Male         | Female       | Male       | Female     | Male                 | Female       | Male         | Female | Male                                                    | Female      | WT               | cd         |         |            | WT          |
| G0           | 300              | 15<br>5.0%                  | 285<br>95.0%                | 15<br>5.0%                            |              |              |              |            |            |                      | 135<br>45.0% | 150<br>50.0% |        |                                                         | 15          |                  | 258        |         | 2          | 275         |
| G1           | 3992             | 462<br>11.6%                | 3530<br>88.4%               | 32<br>5.9%                            | 33<br>6.1%   |              |              |            |            |                      | 263<br>48.9% | 210<br>39.0% |        |                                                         | 38          |                  | 255        |         | 1          | 294         |
| G2           | 4636             | 1303<br>28.1%               | 3333<br>71.9%               | 63<br>12.1%                           | 66<br>12.7%  | 4<br>0.8%    | 3<br>0.6%    |            |            |                      | 184<br>35.5% | 199<br>38.3% |        |                                                         | 51          |                  | 178        |         | 39         | 268         |
| G3           | 4835             | 214<br>36.2%                | 377<br>63.8%                | 98<br>17.5%                           | 94<br>16.8%  | 2<br>0.4%    | 5<br>0.9%    | 1<br>0.2%  | 3<br>0.5%  |                      | 183<br>32.7% | 173<br>30.9% |        |                                                         | 107         |                  | 118        |         | 17         | 242         |
| G4           | 5215             | 432<br>72.6%                | 163<br>27.4%                | 110<br>22.6%                          | 138<br>28.4% | 44<br>9.1%   | 49<br>10.1%  | 4<br>0.8%  | 8<br>1.6%  |                      | 78<br>16.0%  | 55<br>11.3%  |        |                                                         | 125         |                  | 81         |         | 37         | 243         |
| G5           | 4421             | 510<br>87.6%                | 72<br>12.4%                 | 93<br>18.6%                           | 98<br>19.6%  | 101<br>20.2% | 128<br>25.5% | 14<br>2.8% | 11<br>2.2% |                      | 30<br>6.0%   | 26<br>5.2%   |        |                                                         | 108         |                  | 22         |         | 22         | 152         |
| G6           | 3407             | 549<br>98.0%                | 11<br>2.0%                  | 54<br>10.6%                           | 54<br>10.6%  | 173<br>33.9% | 196<br>38.4% | 14<br>2.7% | 8<br>1.6%  |                      | 5<br>1.0%    | 6<br>1.2%    |        |                                                         | 186         |                  | 3          |         | 31         | 220         |
| G7           | 5511             | 591<br>99.5%                | 3<br>0.5%                   | 13<br>2.3%                            | 9<br>1.6%    | 286<br>49.7% | 251<br>43.6% | 9<br>1.6%  | 5<br>0.9%  |                      | 2<br>0.3%    | 1<br>0.2%    |        |                                                         | 205         |                  |            |         | 30         | 235         |
| G8           | 4310             | 551<br>100%                 |                             | 3<br>0.5%                             | 3<br>0.5%    | 260<br>47.2% | 285<br>51.7% |            |            |                      |              |              |        |                                                         | 153         |                  |            |         | 51         | 204         |
| G9           | 2533             | 563<br>100%                 |                             | 7<br>1.2%                             | 13<br>2.3%   | 263<br>46.7% | 279<br>49.6% |            | 1<br>0.2%  |                      |              |              |        |                                                         | 161         |                  |            |         | 87         | 248         |
| G10          | 3048             | 543<br>99.1%                | 5<br>0.9%                   | 4<br>0.7%                             | 2<br>0.4%    | 261<br>47.6% | 276<br>50.4% |            |            |                      |              |              |        |                                                         | 2<br>0.36%  | 3<br>0.55%       | 196        |         | 15         | 211         |
| G11          | 2742             | 552<br>100%                 |                             | 3<br>0.5%                             | 2<br>0.4%    | 260<br>47.1% | 287<br>52.0% |            |            |                      |              |              |        |                                                         | 184         |                  |            |         | 18         | 202         |
| <b>TOTAL</b> | <b>44950</b>     | <b>6285</b>                 | <b>7779</b>                 |                                       |              |              |              |            |            |                      |              |              |        |                                                         | <b>1529</b> |                  | <b>915</b> |         | <b>350</b> | <b>2794</b> |

1. Adults contributing to the next generation: total number of emerged males and females that survived when oviposition egg cups provided. Abbreviations: cd, cardinal (pale red-eye, positive +, negative-); CFP, cyan fluorescent protein (positive +, negative -); WT, wild-type eye color.

**Table S16. Small cage trial data 1:9 ratio cage C-3.**

| Generation | Total population | CFP+ (Larval) (%) | CFP- (Larval) (%) | CFP+ (Pupal and adult) |              |              |              |            |            | CFP- (pupal and adult) |              |      |        | Adults that contributed to the next generation* |    |       |    |         |       |
|------------|------------------|-------------------|-------------------|------------------------|--------------|--------------|--------------|------------|------------|------------------------|--------------|------|--------|-------------------------------------------------|----|-------|----|---------|-------|
|            |                  |                   |                   | WT                     |              | cd           |              | Tear eye   |            | WT                     |              | cd   |        | CFP +                                           |    | CFP - |    | Unknown | Total |
|            |                  |                   |                   | Male                   | Female       | Male         | Female       | Male       | Female     | Male                   | Female       | Male | Female | WT                                              | cd | WT    | cd |         |       |
| G0         | 300              | 15<br>5.0%        | 285<br>95.0%      | 15<br>5.0%             |              |              |              |            |            | 135<br>45.0%           | 150<br>50.0% |      |        | 14                                              |    | 231   |    | 10      | 255   |
| G1         | 3629             | 121<br>3.3%       | 3508<br>96.7%     | 3<br>0.6%              | 8<br>1.5%    |              |              |            |            | 246<br>45.6%           | 283<br>52.4% |      |        | 14                                              |    | 255   |    |         | 269   |
| G2         | 4235             | 633<br>14.9%      | 3602<br>85.1%     | 25<br>4.4%             | 28<br>5.0%   | 4<br>0.7%    | 6<br>1.1%    | 1<br>0.2%  |            | 266<br>47.2%           | 233<br>41.4% |      |        | 26                                              |    | 191   |    | 45      | 262   |
| G3         | 5429             | 1099<br>20.2%     | 4330<br>79.8%     | 61<br>11.7%            | 46<br>8.8%   |              |              |            |            | 211<br>40.5%           | 203<br>39.0% |      |        | 40                                              |    | 147   |    | 45      | 232   |
| G4         | 2517             | 178<br>31.2%      | 393<br>68.8%      | 62<br>12.9%            | 58<br>12.1%  | 5<br>1.0%    | 12<br>2.5%   | 1<br>0.2%  | 6<br>1.2%  | 155<br>32.2%           | 182<br>37.8% |      |        | 57                                              |    | 123   |    | 39      | 219   |
| G5         | 3255             | 335<br>54.2%      | 283<br>45.8%      | 94<br>19.6%            | 122<br>25.4% | 23<br>4.8%   | 15<br>3.1%   | 4<br>0.8%  | 7<br>1.5%  | 110<br>22.9%           | 105<br>21.9% |      |        | 104                                             |    | 89    |    | 22      | 215   |
| G6         | 3259             | 441<br>76.8%      | 133<br>23.2%      | 112<br>20.6%           | 109<br>20.0% | 99<br>18.2%  | 82<br>15.0%  | 6<br>1.1%  | 10<br>1.8% | 72<br>13.2%            | 55<br>10.1%  |      |        | 169                                             |    | 59    |    | 57      | 285   |
| G7         | 5836             | 483<br>94.0%      | 31<br>6.0%        | 64<br>14.2%            | 83<br>18.4%  | 121<br>26.8% | 130<br>28.8% | 12<br>2.7% | 15<br>3.3% | 16<br>3.5%             | 11<br>2.4%   |      |        | 182                                             |    | 15    |    | 17      | 214   |
| G8         | 4348             | 507<br>96.2%      | 20<br>3.8%        | 33<br>6.3%             | 26<br>4.9%   | 207<br>39.3% | 224<br>42.5% | 8<br>1.5%  | 9<br>1.7%  | 7<br>1.3%              | 13<br>2.5%   |      |        | 165                                             |    | 7     |    | 39      | 211   |
| G9         | 3855             | 643<br>100.0%     |                   | 29<br>4.5%             | 25<br>3.9%   | 277<br>43.1% | 286<br>44.5% | 11<br>1.7% | 15<br>2.3% |                        |              |      |        | 133                                             |    |       |    | 70      | 203   |
| G10        | 1668             | 518<br>100.0%     |                   |                        |              | 276<br>53.3% | 242<br>46.7% |            |            |                        |              |      |        | 197                                             |    |       |    | 7       | 204   |
| G11        | 2979             | 550<br>100.0%     |                   |                        |              | 250<br>45.5% | 300<br>54.5% |            |            |                        |              |      |        | 162                                             |    |       |    | 58      | 220   |
| TOTAL      | 41310            | 5523              | 12585             |                        |              |              |              |            |            |                        |              |      |        | 1263                                            |    | 1117  |    | 409     | 2789  |

1. Adults contributing to the next generation: total number of emerged males and females that survived when oviposition egg cups provided. Abbreviations: cd, cardinal (pale red-eye, positive +, negative-); CFP, cyan fluorescent protein (positive +, negative -); WT, wild-type eye color.

| <b>Table S17. Sequence analysis of exceptional phenotype individuals (CFP/cd<sup>1</sup>) from cage trials.</b> |                                                                                           |
|-----------------------------------------------------------------------------------------------------------------|-------------------------------------------------------------------------------------------|
| <b>C/G/n/gen<sup>1</sup></b>                                                                                    | <b>Sequence 5'-3'<sup>2</sup></b>                                                         |
| Wild-type                                                                                                       | ACCCGAGTGGAAACGGTACGGC <b>GGTTAGCGACGATGCCAAGGCGG</b> CCGCCATAGCGGATGGCGAGAAGGCGCTGGGC    |
| B2/G11/1/he                                                                                                     | ACCCGAGTGGAAACGGTACGGC <b>GGTTAGCGACGAT</b> -----GCCATAGCGGATGGCGAGAAGGCGCTGGGC           |
| B2/G11/1/he                                                                                                     | ACCCGAGTGGAAACGGTACGGC <b>GGTTAGCG</b> -----G <b>CCGCC</b> ATAGCGGATGGCGAGAAGGCGCTGGGC    |
| C2/G10/3/ho                                                                                                     | ACCCGAGTGGAAACGGTACGGC <b>GGTTAGCGACGAT</b> -----GCCATAGCGGATGGCGAGAAGGCGCTGGGC           |
| C2/G10/1/ho                                                                                                     | ACCCGAGTGGAAACGGTACGGC <b>GGTTAGCGA</b> ----- <b>CGG</b> CCGCCATAGCGGATGGCGAGAAGGCGCTGGGC |
| 1. Cage/Generation/number of mosquitoes/heterozygous (he) or homozygous (ho).                                   |                                                                                           |
| 2. Blue letters are the guide RNA target site and orange are the PAM site. Dashes are deletions.                |                                                                                           |

**Table S18. Frequency of alternative alleles (single nucleotide polymorphisms [SNPs]) in the AgNosCd-1 guide RNA target site in colonized and wild populations of *Anopheles gambiae*.<sup>1</sup>**

| Region (impact) <sup>2</sup> | SNP Coordinate <sup>3</sup> | Ref <sup>4</sup> | Alt <sup>4</sup> | MR4 <i>An. gambiae</i> (N=68) | MR4 <i>coluzzii</i> (N=113) | MR4 G3 (N=20) | <i>An. gambiae</i> VGL (N=238) | <i>An. gambiae</i> Ag1000G (N=664) | <i>An. coluzzii</i> VGL (N=54) | <i>An. coluzzii</i> Ag1000G (N=293) | <i>An. gambiae</i> overall (N=902) | <i>An. coluzzii</i> overall (N=347) |
|------------------------------|-----------------------------|------------------|------------------|-------------------------------|-----------------------------|---------------|--------------------------------|------------------------------------|--------------------------------|-------------------------------------|------------------------------------|-------------------------------------|
| PAM (highest)                | 2R:38748879                 | C                | T                | -                             | -                           | -             | 0.0042                         | 0.0030                             | -                              | -                                   | 0.0033                             | -                                   |
|                              | 2R:38748880                 | C                | A/T              | -                             | -                           | -             | -                              | 0.0008                             | -                              | -                                   | 0.0006                             | -                                   |
| PAM (none)                   | 2R:38748881                 | G                | A                | -                             | -                           | -             | -                              | 0.030                              | 0.0185                         | 0.0358                              | 0.0022                             | 0.0331                              |
| Seed region (high)           | 2R:38748882                 | C                | T                | -                             | -                           | -             | -                              | 0.0023                             | -                              | -                                   | 0.0017                             | -                                   |
|                              | 2R:38748883                 | C                | A/T              | -                             | -                           | 0.025         | 0.0042                         | 0.0008                             | -                              | -                                   | 0.0017                             | -                                   |
|                              | 2R:38748884                 | T                | .                | -                             | -                           | -             | -                              | -                                  | -                              | -                                   | -                                  | -                                   |
|                              | 2R:38748885                 | T                | C                | -                             | -                           | -             | -                              | -                                  | 0.0093                         | -                                   | -                                  | 0.0014                              |
|                              | 2R:38748886                 | G                | .                | -                             | -                           | -             | -                              | -                                  | -                              | -                                   | -                                  | -                                   |
| Non-seed protospacer (low)   | 2R:38748887                 | G                | T                | -                             | -                           | -             | -                              | 0.0166                             | -                              | 0.0017                              | 0.0122                             | 0.0014                              |
|                              | 2R:38748888                 | C                | .                | -                             | -                           | -             | -                              | -                                  | -                              | -                                   | -                                  | -                                   |
|                              | 2R:38748889                 | A                | T                | -                             | -                           | -             | 0.0189                         | 0.0181                             | 0.0093                         | -                                   | 0.0183                             | 0.0014                              |
|                              | 2R:38748890                 | T                | .                | -                             | -                           | -             | -                              | -                                  | -                              | -                                   | -                                  | -                                   |
|                              | 2R:38748891                 | C                | .                | -                             | -                           | -             | -                              | -                                  | -                              | -                                   | -                                  | -                                   |
|                              | 2R:38748892                 | G                | .                | -                             | -                           | -             | -                              | -                                  | -                              | -                                   | -                                  | -                                   |
|                              | 2R:38748893                 | T                | C                | -                             | -                           | -             | -                              | 0.0015                             | -                              | -                                   | 0.0011                             | -                                   |
|                              | 2R:38748894                 | C                | .                | -                             | -                           | -             | -                              | -                                  | -                              | -                                   | -                                  | -                                   |
|                              | 2R:38748895                 | G                | T                | 0.0074                        | -                           | -             | -                              | -                                  | -                              | -                                   | -                                  | -                                   |
|                              | 2R:38748896                 | C                | .                | -                             | -                           | -             | -                              | -                                  | -                              | -                                   | -                                  | -                                   |
|                              | 2R:38748897                 | T                | .                | -                             | -                           | -             | -                              | -                                  | -                              | -                                   | -                                  | -                                   |
|                              | 2R:38748898                 | A                | T                | 0.27721                       | 0.0973                      | -             | 0.2815                         | 0.4367                             | 0.2685                         | 0.3379                              | 0.3958                             | 0.3271                              |
|                              | 2R:38748899                 | A                | .                | -                             | -                           | -             | -                              | -                                  | -                              | -                                   | -                                  | -                                   |
|                              | 2R:38748900                 | C                | .                | -                             | -                           | -             | -                              | -                                  | -                              | -                                   | -                                  | -                                   |
| 2R:38748901                  | C                           | T                | -                | -                             | -                           | 0.0588        | 0.0173                         | -                                  | 0.0051                         | 0.0588                              | 0.0283                             |                                     |

1. Frequencies are based on specimens from colonies supplied by the Malaria Research and Reference Reagent Resource Center (MR4; <https://www.beiresources.org/MR4Home.aspx>), the UC Davis Vector Genetics Lab (VGL) collection and publicly-available data from the *Anopheles gambiae* 1000 Genomes Consortium (Ag1000G). Overall consolidated frequencies from VGL and Ag1000G are shown in the sister species *An. coluzzii*. N= number of mosquitoes in each sample. Sites within the PAM are highlighted by orange shading.

2. Target site classification based on Drury et al.<sup>11</sup>.

3. Guide RNA target site is listed in antisense (top to bottom) as it appears in the genome assembly (VectorBase; <https://www.vectorbase.org/>)<sup>1</sup>.

4. Nucleotides in the reference genome (<https://www.vectorbase.org/>)<sup>1</sup> and alternate (Alt) SNPs found in colonized and wild mosquito populations.

**Figure S1. Mutations in *Agcd* result in modulations of ommochrome pathway metabolites.** A) Ommochrome pathway<sup>12,13</sup>. Differences in metabolite accumulation in mosquito extracts are indicated by =, indicating no change, or < or >, indicating a significant change at some developmental stage (larva, pupa, or one or two day-old adults) in metabolite concentration. The gene drive knockout of the *Agcd* gene is indicated by the dashed red line. B-F) HPLC-MS/MS quantification of tryptophan metabolites in WT and gene drive (*AgNosCd-1*) mosquitoes. Quantification was performed on fourth instar larvae, pupae, 1-day adults and 2-day adults. Metabolites are quantified with standard curves and internal standards, TRP-d3 for TRP, 4-ClKYN for KYN and 3-HK, and KYNA-d5 for XA and KYNA. Mean concentrations in nanomoles (nM, Y-axes) of three replicates shown for tryptophan (B), kynurenine (C), kynurenic acid (D), 3-hydroxykynurenine (E), and xanthurenic acid (F). Students T-test performed between WT and *AgNosCd-1* for each developmental stage. Differences considered significant when \**P*<.05. Error bars represent the standard deviation. Abbreviations: TDO, tryptophan-2,3-dioxygenase; KAT, kynurenine aminotransferase; KMO, kynurenine 3-monooxygenase; HKT, 3-hydroxykynurenine transaminase.

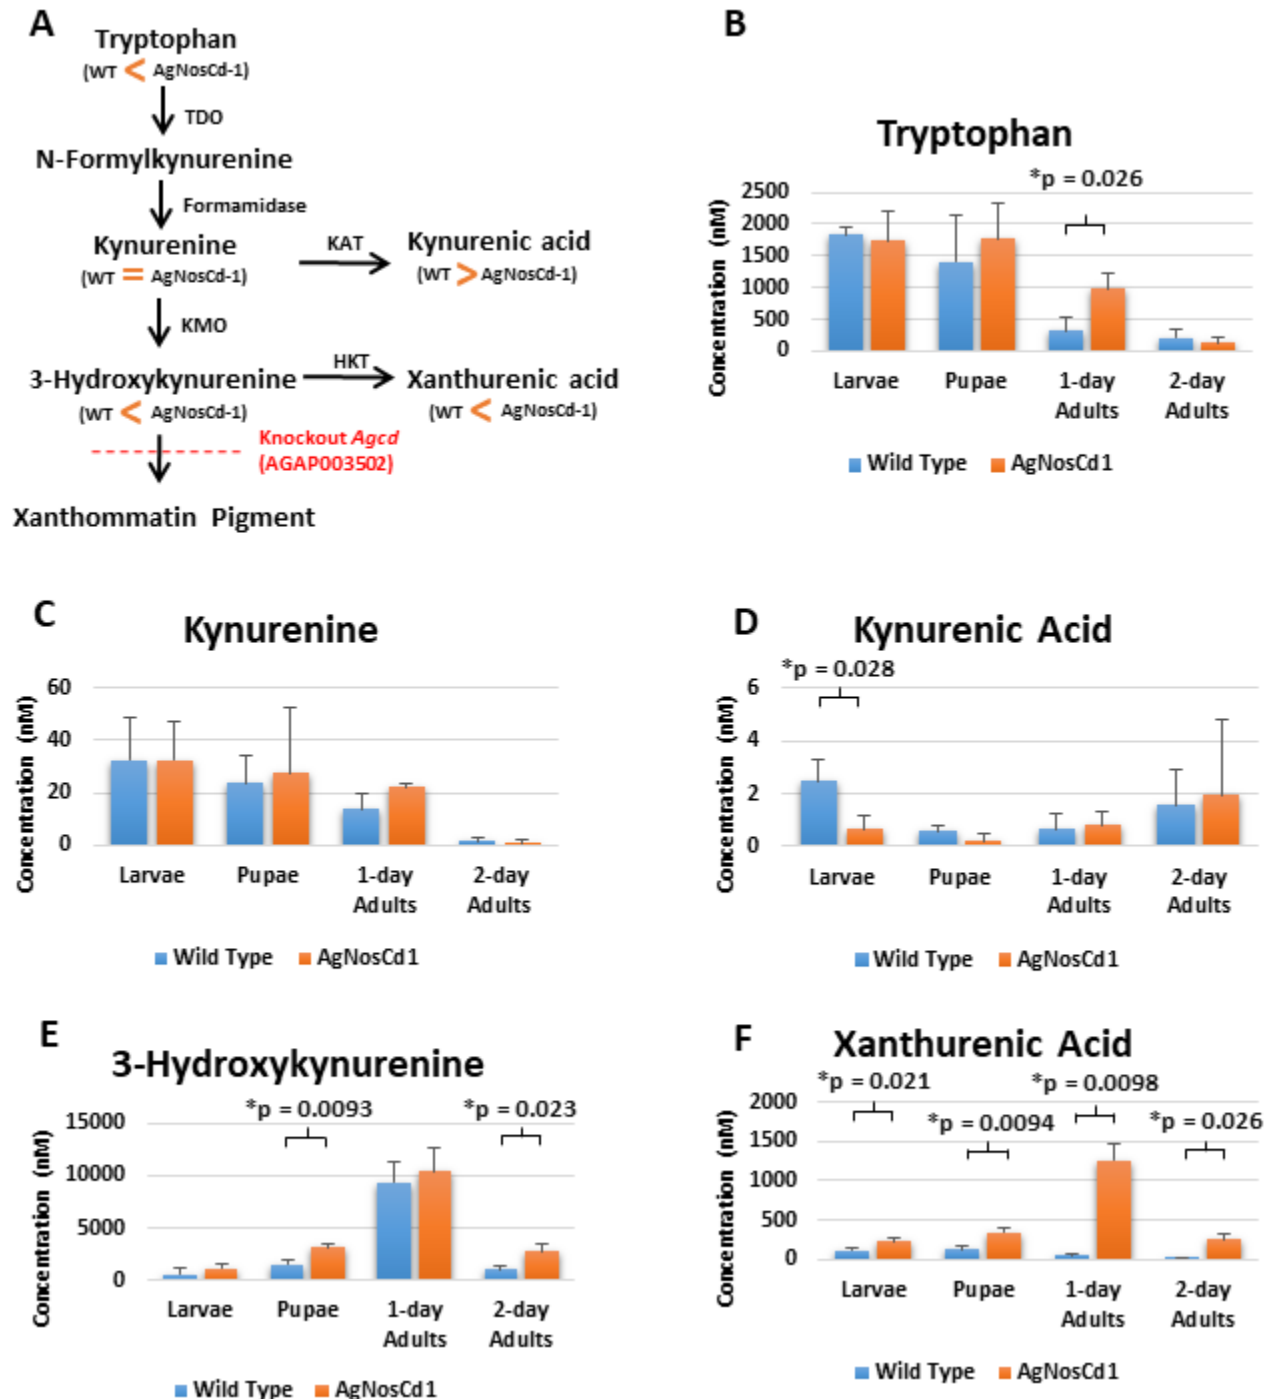

**Figure S2. Molecular validation of precise insertion of the pCO-37 plasmid into the *Agcd* locus.** A) Sequencing of the 5'- and 3'-end junction amplification fragments of the homology arms and construct amplified from a female heterozygous for the cassette (*AgNosCd1-OX*) and a female homozygous for the cassette (*AgNosCd1-IX*) showed a match to the reference Cas9-mediated cleavage sequence and precise integration at the *Agcd* locus. Positions of the Cd1 homology arms (grey boxes), guide RNA target sequence (blue box, PAM in yellow) and portions of the construct cargo (purple and green boxes) are shown. B) Single mosquito extractions containing individuals homozygous (*IX*) or heterozygous (*OX*) for *AgNosCd-1*, or wild type (*WT*) show amplicons with sizes diagnostic for the presence (1,682, 1,249, 2,409 and 2,238 base pairs in length) or absence (1,323 bp) of the gene drive construct using the oligonucleotide primers listed below each panel (Table S1). Individuals containing one copy of *AgNosCd-1* had only the 1,323 bp product using primers (card F2/card-seq R1) that span the target sequence because the large size (~10 kilobases in length) of the integrated *AgNosCd-1* prohibits amplification. The DNA ladder (M) used in each gel was 1 kb Plus (ThermoFisher Scientific) and the 1,500 bp standard is indicated.

**A**

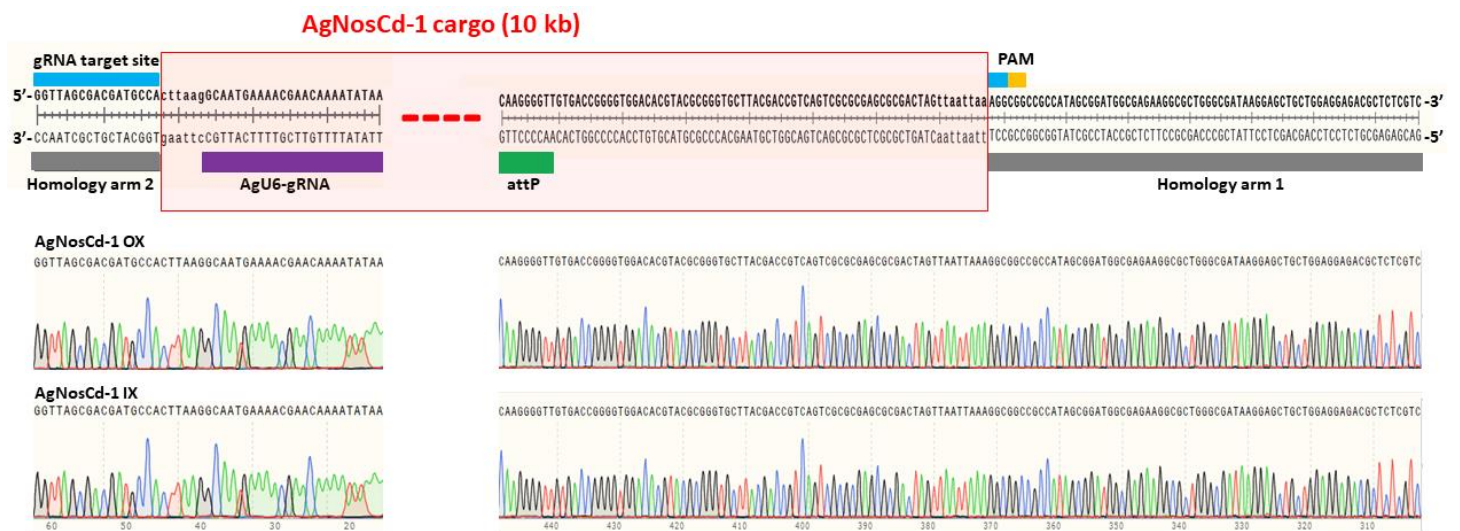

**B**

**Junction of homology arm 1 and *AgNosCd-1* cargo**

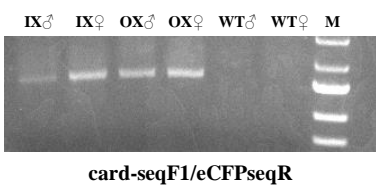

**Junction of homology arm 2 and *AgNosCd-1* cargo**

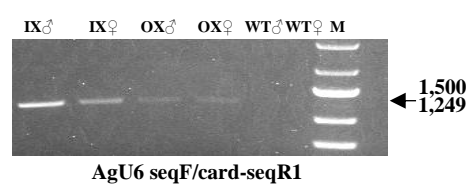

**Junction of region beyond homology arm 1 and *AgNosCd-1* cargo**

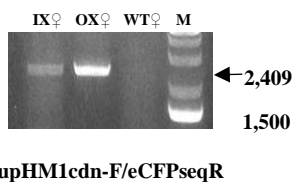

**Junction of region beyond homology arm 2 and *AgNosCd-1* cargo**

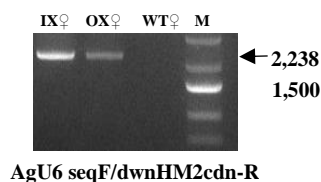

**Left and right regions of homology arms**

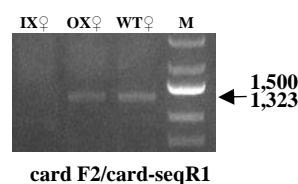

**Figure S3. Mating scheme to test male and female drive properties.** The scheme shows the mating events of male (left panel) and female (right panel) lineages. Forty males (left panel) and females (right panel) hemizygous for *AgNosCd-1* were outcrossed (OX) separately with 40 opposite sex WT *An. gambiae* G3 (male OX [outcross] indicated with blue boxes and female OX are indicated with red boxes). Male and female progeny of these parents that had expected phenotypes of WT eyes and the CFP<sup>+</sup> marker were repeatedly outcrossed to WT individuals for four generations in order to determine role of maternal effects and/or targeted Cas9 in somatic cells when comparing successive male and/or female contributions of the drive system to offspring. Abbreviations: F1-4, first, second, third and fourth generations, respectively, following parental, P, matings.

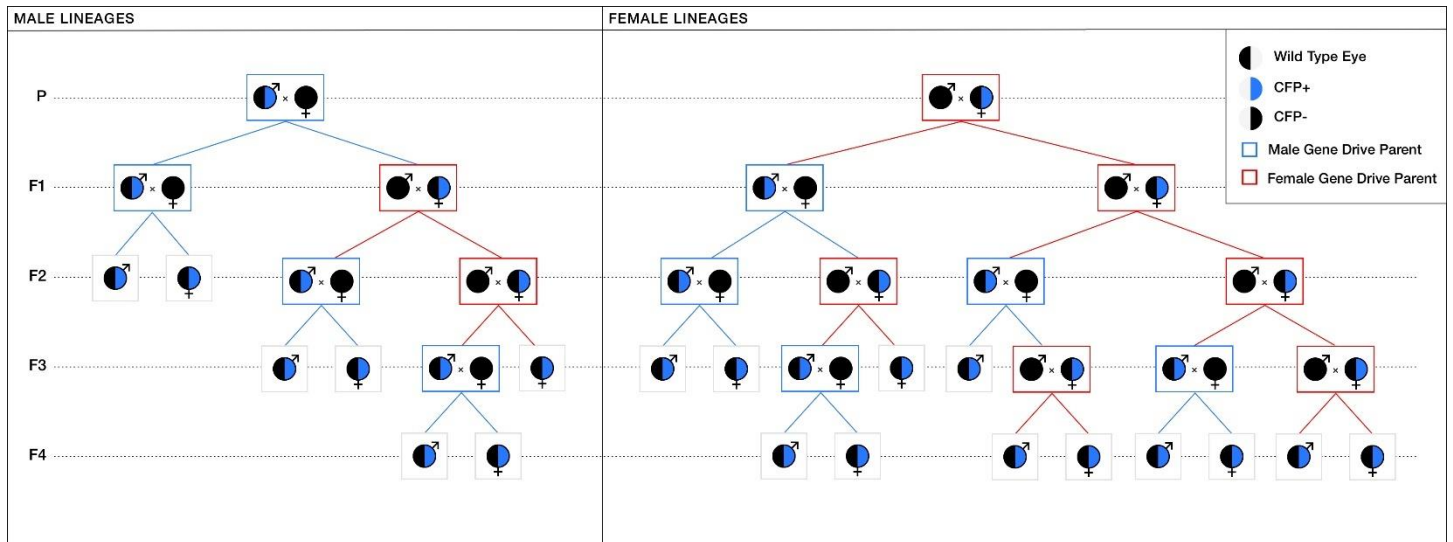



**Figure S4. Phenotype and molecular analysis of mosaic individuals (‘tear phenotype’).** (A) Tear phenotype in *AgNosCd1* pupae ( $CFP^+$ ). Bright-field image (right) shows the tear phenotype in the background of a homozygous *cardinal* mutant (red eye) background. Fluorescent image (left) shows  $CFP^+$  ommatidia in mosaic eye. Gene amplification and NGS analysis of *Agcd* insertion sites in pooled samples of wild-type (B) and tear (C) mosquitoes. The percentage of reads (Y-axis, note that the scale differs between B and C) with insertions (green line) and deletions (blue line) mapped across the sequences of the amplicons (X-axis). The target region blocked in orange designates the gRNA target sequence, with PAM sequence immediately adjacent to the left border. (D) Quantitative details of indels found in both sample cohorts.

A

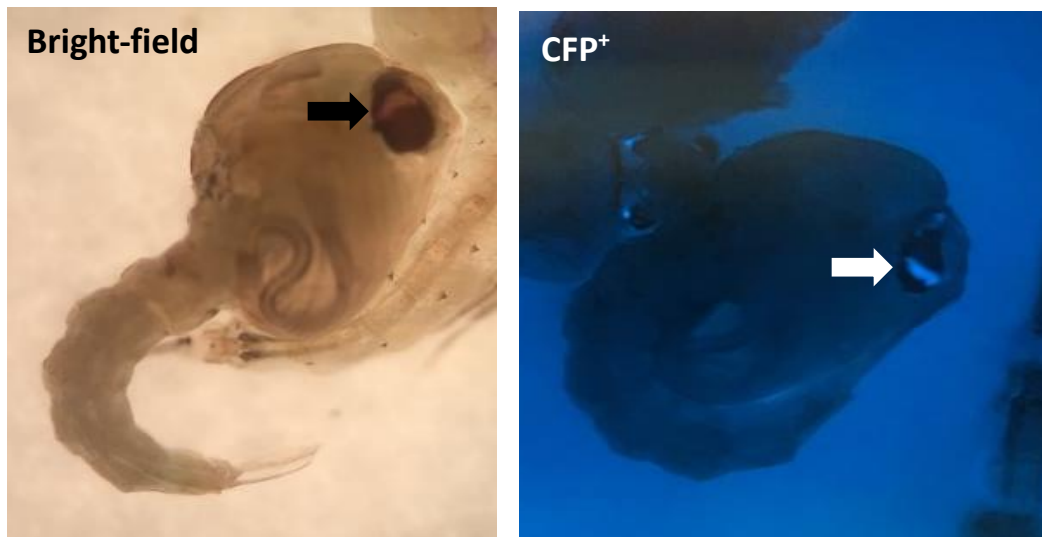

B

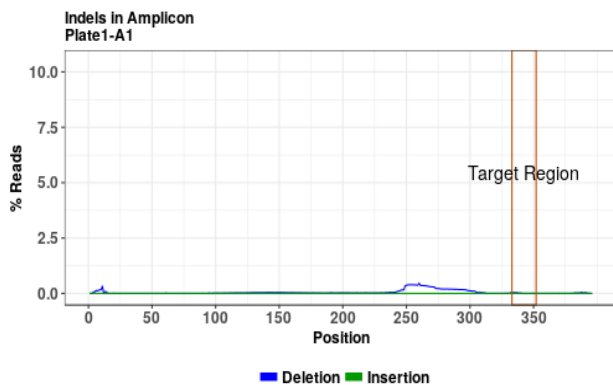

C

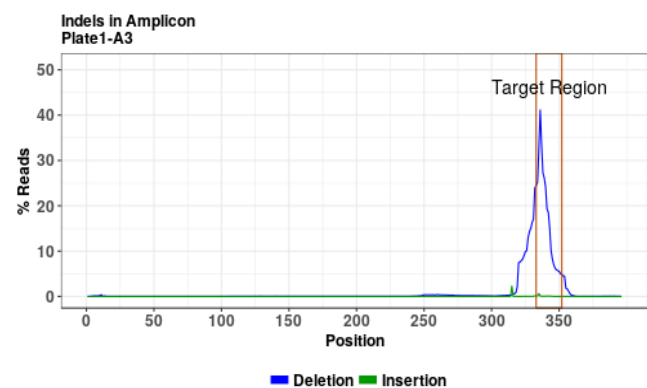

D

| Sample (# individuals)      | Total Reads | Indel reads near cut site (%)* | Indel Size Range |
|-----------------------------|-------------|--------------------------------|------------------|
| WT (15)                     | 112,443     | 3 (0.0027)                     | -8, -5           |
| <i>AgNosCd1</i> “Tear” (20) | 109,903     | 46,005 (41.86)                 | -19, +17         |

\* Refers to any indel present within three base pairs of the Cas9 cleavage site, which is 3bp downstream from the PAM.

**Figure S5. Small cage trial schematic.** Triplicate cages (A1-3, B1-3 and C1-3) were established with 150 wild-type females (black) and different ratios (1:1, 1:3 and 1:9) of AgNosCd-1 (blue) and wild-type (black) males, respectively, for a total population size of ~300 mosquitoes per cage. Adults were blood-fed, eggs collected and larvae hatched. Larvae were allotted as follows: 300 selected randomly to populate the next generation cages and 600 selected randomly and scored for eye phenotypes (CFP fluorescence and cardinal) and sex ratio. The remaining larvae were counted and the number added to the number removed to get a population size. Drive efficiency and generation of non-homologous end joining alleles were monitored by the accumulation of the eye phenotype.

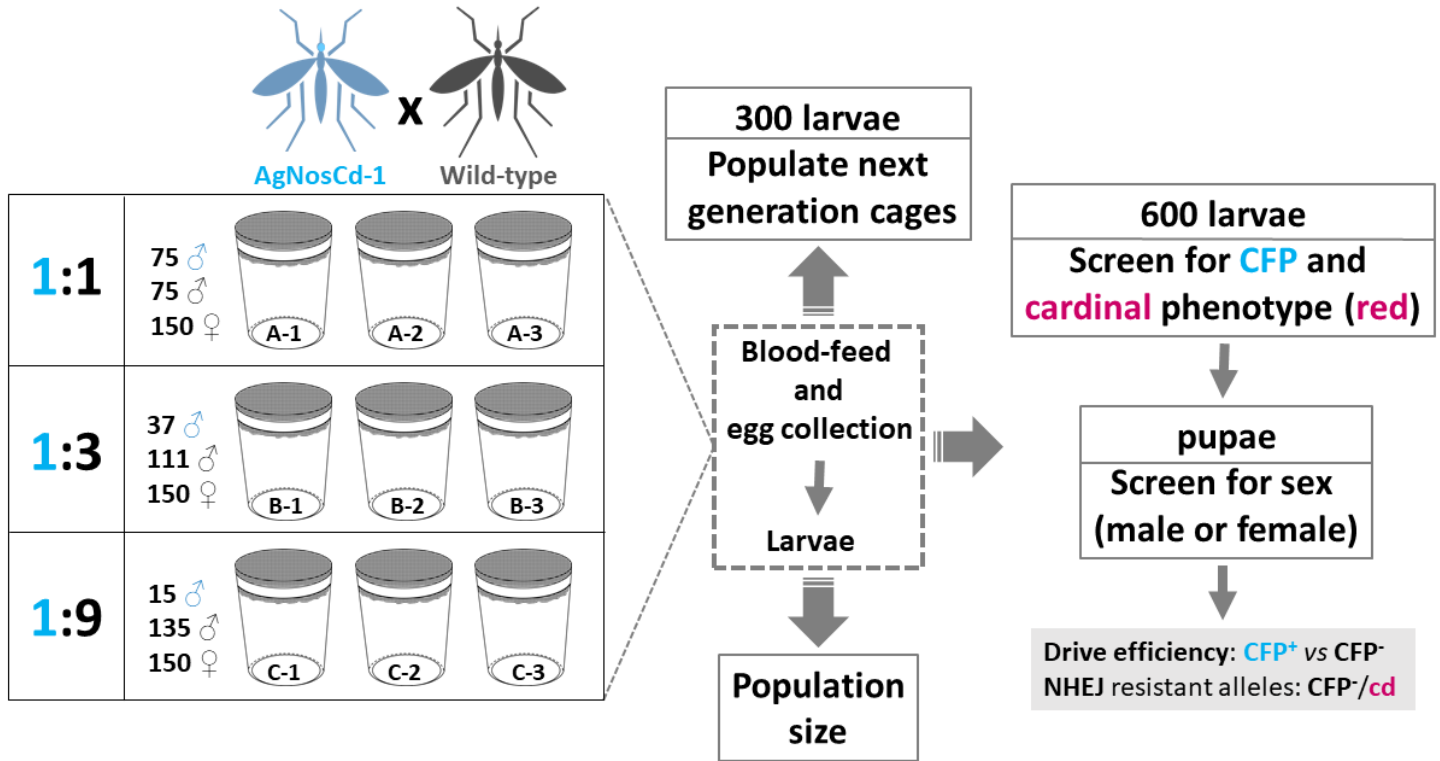

**Figure S6. Genomic off-target nucleotide sequence predictions and cleavage assay *in vitro* for the gRNA targeting site in *Agcd*.** A) The locus, chromosome location, predicted cut -site and sequence of the on-target *cardinal* target site and three predicted off site-targets are displayed. The PAM sequences for the targets are underlined, while nucleotide differences between the gRNA and the predicted off-target sequences are in red bold letters. B) Cas9 and gRNA-mediated cleavage *in vitro* of off-target and control target sites. Plasmids (Table S2) cleaved with *Nco*I were incubated in cleavage reactions with Cas9 and the gRNA. Shown are a negative (-ve) control = pCO-68, positive (+ve) control = pCO-57, off-1 = pCO-66, off-3 = pCO-67. Versions of off-target 2 with known SNPs are off-2-1 = pCO-72, off-2-2 (pCO-73) and off-2-3 (pCO-74).

**A**

| Name                                  | Sequence <sup>1</sup>                              | Chromosome | Cut site <sup>2</sup> |
|---------------------------------------|----------------------------------------------------|------------|-----------------------|
| Wild-type, on-target positive control | GGTTAGCGACGATGCCAAGG <u>CGG</u>                    | 2R         | 38,748,885            |
| No PAM, on-target negative control    | GGTTAGCGACGATGCCAAGG <b>CCC</b>                    | synthetic  | Not present in genome |
| Off-target 1 variant                  | GGTTA <b>ACA</b> ACGAA <b>AA</b> CCAAGG <b>TGG</b> | 2L         | 3,130,338             |
| Off-target 2-1 variant                | GGTTAGCC <b>AGGCG</b> GCCAAGG <b>TGG</b>           | 2R         | 21,710,305            |
| Off-target 2-2 variant                | GGTTAGCC <b>AGGCA</b> GCCAAGG <b>TGG</b>           | 2R         | 21,710,305            |
| Off-target 2-3 variant                | GGTTAGCC <b>AGGCG</b> GCCAAG <b>ATGG</b>           | 2R         | 21,710,305            |
| Off-target 3 variant                  | GGTTAGCGA <b>AGATG</b> GCAT <b>TTGTGG</b>          | 2R         | 40,155,032            |

1. 5'-3'target sequence, PAM (underlined), nucleotide variants from the wild-type target sequence are shown in bold red.  
2. Coordinates based on PEST strain (VectorBase)<sup>1</sup>.

**B**

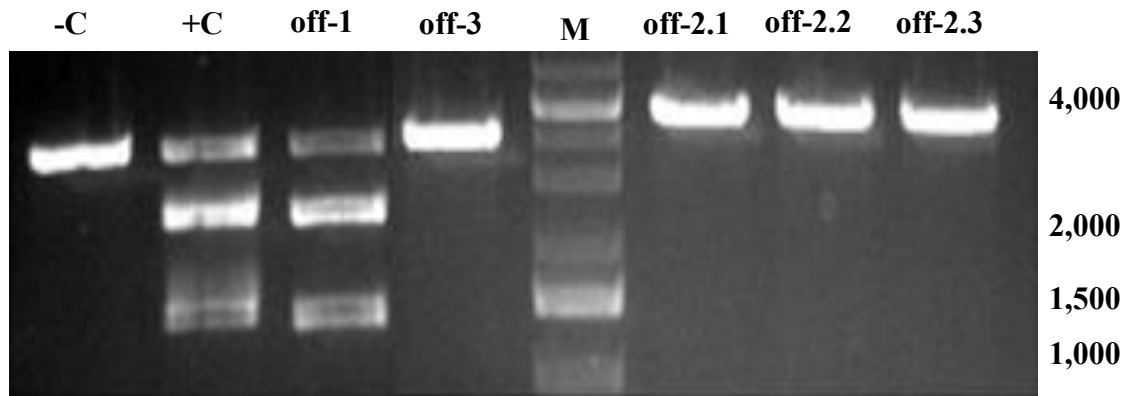



GGGTAAGCGATATGCTGAACTTGTGCGAGCCTGAACTTGTATCCTCCATTTTGGAGCCGGATACAGACGTGGAGGTTCTGGANTCGAGGAC  
TGCCCTGTCTCCGAACTGCTAATACCTTTCATCGTCGTTCTCTGAAGTGTGNTTCTTTTTGGTTGNNGGNACCTGGCGCGGCAACGCTA  
CTGGTCTCNTTTTCTANACTCGANAGTTGGAACCTCTCNTGAGCTNNNNNNNNNNNNNNNNNN

>off1-2-292\_B04.ab1

NNNNNNNNNNNTTGNNGGCACTGTTTNTGTGAGTCATAAAAAATACACCATTAAACTGCTGTGGTGCAGCCGACTGTGAGACATGTTG  
ATCGCGCTCCAGTGACTGAGCTCTAAGCAGACGCGATTCTTTATCGCGTGCCTCATTATGACGTTGAGTATGGCTCGATTTGAATCCT  
TCGTCGTAGGCTGCCGACTGCGTGAGTGATGTAGACCTTGTGCCGGCACAGTGCCTGTCTCGGCTGCTGTATGGATCACATCCGGCCCT  
GCAATGACGCCCGGGTGCATTTCATGGGCAATTTCCAGTGGCAAGCTTGTTCAGGTATATCGAAGTTTGTTCACAACCTCCGCGCTC  
CTCTTCATCTTCAAAAAAGT**CCACCTTGGTTTCGTTGTTAACC**ATCATCAAATCATAACCAGATCCTTCTCCATCAGATGGGTTGAAA  
TCAGATGTGCCAGCGATCTTGACTTTTCGCGGCGGTTGCGGCAAAAGGTTTACAGGTACAATCTCGTGTTCGTTTCGAAATTTTCGAGACTG  
TACAATGCCTGTTTCAGGGATATCATCCACTTGTGATAGAGAATCTCATTCTGGTCTGAAATTTTCGCGCTCTGCATCGTTACGATGTT  
TTGTAGCTCCTCGATTACATCCTCGATCGTTGCGTTGGTATCGTCTTCGCCATTCCCATTCAGTTTCGTGCATAGGAACGGTGTCTCTTT  
GGGTAAGCGATATGCTGAACTTGTGCGAGCCTGAACTTGTATCCTCCATTTTGGAGCCGGATACAGACGTGGANGTTCTGGAGTTCGAGGAC  
TGCCCTGTCTCCGAACTGCTAATACCTTTCATCGTCGTTCTCTGAAGTGTGTTTTCGTTTGGTTGNNGGTACCTGGCGCGGCAACGCT  
ACTGGNCTCTTTTCTANACTCGAAGAGTTGGAACCTCNCGTGAGCTTNNNNNNNNNNNNNNNNNAA

>off1-3-292\_C04.ab1

NNNNNNNNNNNTGCGGCACTGTTTNTGTGAGTCATAAAAAATACACCATTAAACTGCTGTGGTGCAGCCGACTGTGAGACATGTTG  
ATCGCGCTCCAGTGACTGAGCTCTAAGCAGACGCGATTCTTTATCGCGTGCCTCATTATGACGTTGAGTATGGCTCGATTTGAATCCT  
TCGTCGTAGGCTGCCGACTGCGTGAGTGATGTAGACCTTGTGCCGGCACAGTGCCTGTCTCGGCTGCTGTATGGATCACATCCGGCCCT  
GCAATGACGCCCGGGTGCATTTCATGGGCAATTTCCAGTGGCAAGCTTGTTCAGGTATATCGAAGTTTGTTCACAACCTCCGCGCTC  
CTCTTCATCTTCAAAAAAGT**CCACCTTGGTTTCGTTGTTAACC**ATCATCAAATCATAACCAGATCCTTCTCCATCAGATGGGTTGAAA  
TCAGATGTGCCAGCGATCTTGACTTTTCGCGGCGGTTGCGGCAAAAGGTTTACAGGTACAATCTCGTGTTCGTTTCGAAATTTTCGAGACTG  
TACAATGCCTGTTTCAGGGATATCATCCACTTGTGATAGAGAATCTCATTCTGGTCTGAAATTTTCGCGCTCTGCATCGTTACGATGTT  
TTGTAGCTCCTCGATTACATCCTCGATCGTTGCGTTGGTATCGTCTTCGCCATTCCCATTCAGTTTCGTGCATAGGAACGGTGTCTCTTT  
GGGTAAGCGATATGCTGAACTTGTGCGAGCCTGAACTTGTATCCTCCATTTTGGAGCCGGATACAGACGTGGAGGTTCTGGAGTTCGAGGAC  
TGNCTGTCTCCGAACTGCTAATACCTTTCATCGTCGTTCTCTGAAGTGTGTTTTCGTTTGGTTGNNTGGTACCTGGCGCGGCAACGCT  
ACTGGNCTCTTTTCTAGACTCNANAGTTGGAACCTCTCGTGAGCTNNNNNNNNNNNNNNNNNAA

>off1-4-292\_D04.ab1

CNNNNNNNNNNNTGCGGCACTGTTTNTGTGAGTCATAAAAAATACACCATTAAACTGCTGTGGTGCAGCCGACTGTGAGACATGTTGAT  
CGCGCTCCAGTGACTGAGCTCTAAGCAGACGCGATTCTTTATCGCGTGCCTCATTATGACGTTGAGTATGGCTCGATTTGAATCCTTC  
GTCGTAGGCTGCCGACTGCGTGAGTGATGTAGACCTTGTGCCGGCACAGTGCCTGTCTCGGCTGCTGTATGGATCACATCCGGCCCTGC  
AATGACGCCCGGGTGCATTTCATGGGCAATTTCCAGTGGCAAGCTTGTTCAGGTATATCGAAGTTTGTTCACAACCTCCGCGCTCCT  
CTTCATCTTCAAAAAAGT**CCACCTTGGTTTCGTTGTTAACC**ATCATCAAATCATAACCAGATCCTTCTCCATCAGATGGGTTGAAATC  
AGATGTGCCAGCGATCTTGACTTTTCGCGGCGGTTGCGGCAAAAGGTTTACAGGTACAATCTCGTGTTCGTTTCGAAATTTTCGAGACTGTA  
CAATGCCTGTTTCAGGGATATCATCCACTTGTGATAGAGAATCTCATTCTGGTCTGAAATTTTCGCGCTCTGCATCGTTACGATGTTTT  
GTAGCTCCTCGATTACATCCTCGATCGTTGCGTTGGTATCGTCTTCGCCATTCCCATTCAGTTTCGTGCATAGGAACGGTGTCTCTTTGG  
GTAAGCGATATGCTGAACTTGTGCGAGCCTGAACTTGTATCCTCCATTTTGGAGCCGGATACAGACGTGGAGGTTCTGGAGTTCGAGGACTG  
CCCTGTCTCCGAACTGCTAATACCTTTCATCGTCGTTCTCTGAAGTGTGTTTTCGTTTGGTTGNNTGGTACCTGGCGCGGCAACGCTAC  
TGGTCTCTTTTCTANACTCGAAGAGTTGGAACCTCTCGTGAGCTNNNNNNNCNNNNNNNNNN

>off1-5-292\_E04.ab1

NNNNNNNNNNNTTGNNGGCACTGTTTNTGTGAGTCATAAAAAATACACCATTAAACTGCTGTGGTGCAGCCGACTGTGAGACATGTTGATC  
GCGCTCCAGTGACTGAGCTCTAAGCAGACGCGATTCTTTATCGCGTGCCTCATTATGACGTTGAGTATGGCTCGATTTGAATCCTTCG  
TCGTAGGCTGCCGACTGCGTGAGTGATGTAGACCTTGTGCCGGCACAGTGCCTGTCTCGGCTGCTGTATGGATCACATCCGGCCCTGCA  
ATGACGCCCGGGTGCATTTCATGGGCAATTTCCAGTGGCAAGCTTGTTCAGGTATATCGAAGTTTGTTCACAACCTCCGCGCTCCTC  
TTCATCTTCAAAAAAGT**CCACCTTGGTTTCGTTGTTAACC**ATCATCAAATCATAACCAGATCCTTCTCCATCAGATGGGTTGAAATCA  
GATGTGCCAGCGATCTTGACTTTTCGCGGCGGTTGCGGCAAAAGGTTTACAGGTACAATCTCGTGTTCGTTTCGAAATTTTCGAGACTGTAC  
AATGCCTGTTTCAGGGATATCATCCACTTGTGATAGAGAATCTCATTCTGGTCTGAAATTTTCGCGCTCTGCATCGTTACGATGTTTTG  
TAGCTCCTCGATTACATCCTCGATCGTTGCGTTGGTATCGTCTTCGCCATTCCCATTCAGTTTCGTGCATAGGAACGGTGTCTCTTTGGG  
TAAGCGATATGCTGAACTTGTGCGAGCCTGAACTTGTATCCTCCATTTTGGAGCCGGATACAGACGTGGAGGTTCTGGAGTTCGAGGACTGC  
CCTGTCTCCGAACTGCTAATACCTTTCATCGTCGTTCTCTGAAGTGTGTTTTCGTTTGGTTGNNTGGTACCTGGCGCGGCAACGCTACT  
GGNCTCTTTTCTANACTCGAAGANTTGAACCTCTCGTGAGCTNNNNNNNNCANNNNNNNN

>off1-6-292\_F04.ab1

NNNNNNNNNNNNNNNTGCGGCACTGTTTCNTGTGTCAGTCATAAAAAATACACCATTAAACTGCTGTGGTGCAGCCGACTGTGAGACATGTTGATCGCGCTCCAGTGACTGAGCTCTAAGCAGACGCGATTCTTTATCGCGTGCCTCATTATGACGTTGAGTATGGCTCGATTTGAATCCTTCGTCGTAGGCTGCCGACTGCGTGAGTGATGTAGACCTTGTGCCGGCACAGTGCCTGTCTCGGCTGCTGTATGGATCACATCCGGCCC TGCAATGACGCCCCGGGTGCGATTTCATGGGCAATTTCCAGTGGCAAGCTTGTTCAGGTATATCGAAGTTTGTTCACAACCTCCCGCGT CCTCTTCATCTTCAAAAAAGT**CCACCTTGGTTTCGTTGTTAACC**ATCATCAAATCATAACCAGATCCTTCTCCATCAGATGGGTTTCGAA ATCAGATGTGCCAGCGATCTTGACTTTTCGCGGGCGGTTGCGGCAAAAGGTTTACAGGTACAATCTCGTGTTCGTTTCGAAATTTTCGAGACT GTACAATGCCTGTTTCAGGGATATCATCCACTTGTTCAGTATAGAGAATCTCATTCTGGTCTGAAATTTTCGCGCTCTGCATCGTTTCACGATGT TTTGTAGCTCCTCGATTACATCCTCGATCGTTGCGTTGGTATCGTCTTCGCCATTCCCATTTCAGTTCGTGCATAGGAACGGTGTCTCT TGGGTAAGCGATATGCTGAACTTGTGCGAGCCTGAACTTGATCCTCCATTTTTCAGCCGGATACAGACGTGGAGGTTCTGGAGTCGAGGA CTGCCCTGTCTCCGAACTGCTAATAACCTTCATCGTCTGTTCTCTGAAGTGTGTTTCGTTTTGGGTTGAGNNNNNACCTGGCGCGGCAACG CTACTGGTCTCTTTTCTAGACTCGAAGAGTTGNAACTCTCGTGAGCTNNNNNNNNCNCNNNNNNNNNNNN

>off1-7-292\_G04.ab1

NNNNNNNNNNNNNNNTGCGGCACTGTTTCNTGTGTCAGTCATAAAAAATACACCATTAAACTGCTGTGGTGCAGCCGACTGTGAGACATGTTG ATCGCGCTCCAGTGACTGAGCTCTAAGCAGACGCGATTCTTTATCGCGTGCCTCATTATGACGTTGAGTATGGCTCGATTTGAATCCT TCGTCGTAGGCTGCCGACTGCGTGAGTGATGTAGACCTTGTGCCGGCACAGTGCCTGTCTCGGCTGCTGTATGGATCACATCCGGCCCT GCAATGACGCCCCGGGTGCGATTTCATGGGCAATTTCCAGTGGCAAGCTTGTTCAGGTATATCGAAGTTTGTTCACAACCTCCCGCGTC CTCTTCATCTTCAAAAAAGT**CCACCTTGGTTTCGTTGTTAACC**ATCATCAAATCATAACCAGATCCTTCTCCATCAGATGGGTTTCGAAA TCAGATGTGCCAGCGATCTTGACTTTTCGCGGGCGGTTGCGGCAAAAGGTTTACAGGTACAATCTCGTGTTCGTTTCGAAATTTTCGAGACTG TACAATGCCTGTTTCAGGGATATCATCCACTTGTTCAGTATAGAGAATCTCATTCTGGTCTGAAATTTTCGCGCTCTGCATCGTTTCACGATGTT TTGTAGCTCCTCGATTACATCCTCGATCGTTGCGTTGGTATCGTCTTCGCCATTCCCATTTCAGTTCGTGCATAGGAACGGTGTCTCTCT GGGTAAGCGATATGCTGAACTTGTGCGAGCCTGAACTTGATCCTCCATTTTTCAGCCGGATACAGACGTGGAGGTTCTGGAGTCGAGGAC TGCCCTGTCTCCGAACTGCTAATAACCTTCATCGTCTGTTCTCTGAAGTGTGTTTCGTTTTNGGTTGAGGTGGTACCTGGCGCGGCAACG CTACTGGNCTCTTTTCTAGACTCGAAGAGTTGGAACCTCTCNTGAGCTNNNNNNNNCNCNNNNNNNNNNNA

>off1-8-292\_H04.ab1

NNNNNNNNNNNNNNNGCNGGCACTGTTTCNTGTGTCAGTCATAAAAAATACACCATTAAACTGCTGTGGTGCAGCCGACTGTGAGACATGTTG ATCGCGCTCCAGTGACTGAGCTCTAAGCAGACGCGATTCTTTATCGCGTGCCTCATTATGACGTTGAGTATGGCTCGATTTGAATCCT TCGTCGTAGGCTGCCGACTGCGTGAGTGATGTAGACCTTGTGCCGGCACAGTGCCTGTCTCGGCTGCTGTATGGATCACATCCGGCCCT GCAATGACGCCCCGGGTGCGATTTCATGGGCAATTTCCAGTGGCAAGCTTGTTCAGGTATATCGAAGTTTGTTCACAACCTCCCGCGTC CTCTTCATCTTCAAAAAAGT**CCACCTTGGTTTCGTTGTTAACC**ATCATCAAATCATAACCAGATCCTTCTCCATCAGATGGGTTTCGAAA TCAGATGTGCCAGCGATCTTGACTTTTCGCGGGCGGTTGCGGCAAAAGGTTTACAGGTACAATCTCGTGTTCGTTTCGAAATTTTCGAGACTG TACAATGCCTGTTTCAGGGATATCATCCACTTGTTCAGTATAGAGAATCTCATTCTGGTCTGAAATTTTCGCGCTCTGCATCGTTTCACGATGTT TTGTAGCTCCTCGATTACATCCTCGATCGTTGCGTTGGTATCGTCTTCGCCATTCCCATTTCAGTTCGTGCATAGGAACGGTGTCTCTCT GGGTAAGCGATATGCTGAACTTGTGCGAGCCTGAACTTGATCCTCCATTTTTCAGCCGGATACAGACGTGGAGGTTCTGGAGTCGAGGAC TGCCCTGTCTCCGAACTGCTAATAACCTTCATCGTCTGTTCTCTGAAGTGTGTTTCGTTTTGGTTGAGGTGGTACCTGGCGCNGNNGCCT ACTGGNCTCTTTTCTAGACTCNANAGTTGGAACCTCTNNNNNGAGNTNNNNNNNNNNNNNNNNNNNN

>off1-9-292\_A05.ab1

NNNNNNNNNNNNNTGNGGCACTGTTTCNTGTGTCAGTCATAAAAAATACACCATTAAACTGCTGTGGTGCAGCCGACTGTGAGACATGTTGA TCGCGCTCCAGTGACTGAGCTCTAAGCAGACGCGATTCTTTATCGCGTGCCTCATTATGACGTTGAGTATGGCTCGATTTGAATCCTT CGTCGTAGGCTGCCGACTGCGTGAGTGATGTAGACCTTGTGCCGGCACAGTGCCTGTCTCGGCTGCTGTATGGATCACATCCGGCCCTG CAATGACGCCCCGGGTGCGATTTCATGGGCAATTTCCAGTGGCAAGCTTGTTCAGGTATATCGAAGTTTGTTCACAACCTCCCGCGTCC TCTTCATCTTCAAAAAAGT**CCACCTTGGTTTCGTTGTTAACC**ATCATCAAATCATAACCAGATCCTTCTCCATCAGATGGGTTTCGAAAT CAGATGTGCCAGCGATCTTGACTTTTCGCGGGCGGTTGCGGCAAAAGGTTTACAGGTACAATCTCGTGTTCGTTTCGAAATTTTCGAGACTGT ACAATGCCTGTTTCAGGGATATCATCCACTTGTTCAGTATAGAGAATCTCATTCTGGTCTGAAATTTTCGCGCTCTGCATCGTTTCACGATGTTT TGTAGCTCCTCGATTACATCCTCGATCGTTGCGTTGGTATCGTCTTCGCCATTCCCATTTCAGTTCGTGCATAGGAACGGTGTCTCTCTG GGTAAAGCGATATGCTGAACTTGTGCGAGCCTGAACTTGATCCTCCATTTTTCAGCCGGATACAGACGTGGAGGTTCTGGAGTCGAGGACT GCCCTGTCTCCGAACTGCTAATAACCTTCATCGTCTGTTCTCTGAAGTGTGTTTCGTTTTGGTTGAGGTGGTACCTGGCGCGGCAACGCT ACTGGTCTCTTTTCTAGACTCGAAGAGTTGGAACCTCTCGTGAGNTNNNNNNNNCNCNNNNNNNNNNAN

>off1-10-292\_B05.ab1

NNNNNNNNNNNNNNNTGNNGGCACTGTTTCNTGTGTCAGTCATAAAAAATACACCATTAAACTGCTGTGGTGCAGCCGACTGTGAGACATGT TGATCGCGCTCCAGTGACTGAGCTCTAAGCAGACGCGATTCTTTATCGCGTGCCTCATTATGACGTTGAGTATGGCTCGATTTGAATC CTTCGTCGTAGGCTGCCGACTGCGTGAGTGATGTAGACCTTGTGCCGGCACAGTGCCTGTCTCGGCTGCTGTATGGATCACATCCGGCC CTGCAATGACGCCCCGGGTGCGATTTCATGGGCAATTTCCAGTGGCAAGCTTGTTCAGGTATATCGAAGTTTGTTCACAACCTCCCGCG

TCCTCTTCATCTTCAAAAAAGT**CCACCTTGGTTTCGTTGTTAACC**ATCATCAAATCATAAACCAGATCCTTCTCCATCAGATGGGTTCGA  
AATCAGATGTGCCAGCGATCTTGACTTTTCGCGGCGGTTGCGGCAAAAGGTTTACAGGTACAATCTCGTGTTCGTTTCGAAATTTTCGAGAC  
TGTACAATGCCTGTTTCAGGGATATCATCCACTTGTGATAGAGAATCTCATTCTGGTCTGAAATTTTCGCGCTCTGCATCGTTACAGATG  
TTTTGTAGCTCCTCGATTACATCCTCGATCGTTGCGTTGGTATCGTCTTCGCCATTCCATTTCAGTTTCGTGCATAGGAACGGTGCTCTC  
TTGGGTAAGCGATATGCTGAACTTGTGCGAGCCTGAACTTGCATCCTCCATTTTTCGAGCCGGATACAGACGTGGANGTTCTGGAGTCGAGG  
ACTGCCCTGTCTCCGAACTGCTAATACCTTTCATCGTCTGTTCTCTGAAGTGTGTTTCGTTTGGTTGNNGGTACCTGGCGCGGCAACG  
CTACTGGNCTCTTTTCTANACTCGAAGAGTTGGAACCTCTCGTGAGNTNNNNNNNNNNNGNNNNNN

>off1-11-292\_C05.ab1

CNNNNNNNNNNNTGNNGGCACTGTTTCNTGTGTCAGTCATAAAAAATACACCATTAAACTGCTGTGGTGCAGCCGACTGTGAGACATGTTG  
ATCGCGCTCCAGTGACTGAGCTCTAAGCAGACGCGATTCTTTATCGCGTGCCTCATTATGACGTTGAGTATGGCTCGATTTGAATCCT  
TCGTCTGATAGGCTGCCGACTGCGTGAGTGATGTAGACCTTGTGCCGGCACAGTGCCTGTCTCGGCTGCTGTATGGATCACATCCGGCCCT  
GCAATGACGCCCGGGTGCATTTCATGGGCAATTTCCAGTGGCAAGCTTGTGTCAGGTATATCGAAGTTTGTTCACAACCTCCCGCGTC  
CTCTTCATCTTCAAAAAAGT**CCACCTTGGTTTCGTTGTTAACC**ATCATCAAATCATAAACCAGATCCTTCTCCATCAGATGGGTTTCGAA  
TCAGATGTGCCAGCGATCTTGACTTTTCGCGGCGGTTGCGGCAAAAGGTTTACAGGTACAATCTCGTGTTCGTTTCGAAATTTTCGAGACTG  
TACAATGCCTGTTTCAGGGATATCATCCACTTGTGATAGAGAATCTCATTCTGGTCTGAAATTTTCGCGCTCTGCATCGTTACAGATGTT  
TTGTAGCTCCTCGATTACATCCTCGATCGTTGCGTTGGTATCGTCTTCGCCATTCCATTTCAGTTTCGTGCATAGGAACGGTGCTCTCTT  
GGGTAAGCGATATGCTGAACTTGTGCGAGCCTGAACTTGCATCCTCCATTTTTCGAGCCGGATACAGACGTGGAGGTTCTGGAGTCGAGGAC  
TGCCCTGTCTCCGAACTGCTAATACCTTTCATCGTCTGTTCTCTGAAGTGTGTTTCGTTTGGTTGANGTGGTACCTGGCGCGGCAACGC  
TACTGGTCTCTTTTCTANACTCGAAGAGTTGGAACCTCTCGTGAGNTNNNNNNNNNCCANNNNN

>off1-12-292\_D05.ab1

NNNNNNNNNNNTGNNGGCACTGTTTCNTGTGTCAGTCATAAAAAATACACCATTAAACTGCTGTGGTGCAGCCGACTGTGAGACATGTT  
GATCGCGCTCCAGTGACTGAGCTCTAAGCAGACGCGATTCTTTATCGCGTGCCTCATTATGACGTTGAGTATGGCTCGATTTGAATCC  
TTCGTCTGATAGGCTGCCGACTGCGTGAGTGATGTAGACCTTGTGCCGGCACAGTGCCTGTCTCGGCTGCTGTATGGATCACATCCGGCCC  
TGCAATGACGCCCGGGTGCATTTCATGGGCAATTTCCAGTGGCAAGCTTGTGTCAGGTATATCGAAGTTTGTTCACAACCTCCCGCGT  
CCTCTTCATCTTCAAAAAAGT**CCACCTTGGTTTCGTTGTTAACC**ATCATCAAATCATAAACCAGATCCTTCTCCATCAGATGGGTTTCGAA  
ATCAGATGTGCCAGCGATCTTGACTTTTCGCGGCGGTTGCGGCAAAAGGTTTACAGGTACAATCTCGTGTTCGTTTCGAAATTTTCGAGACT  
GTACAATGCCTGTTTCAGGGATATCATCCACTTGTGATAGAGAATCTCATTCTGGTCTGAAATTTTCGCGCTCTGCATCGTTACAGATGT  
TTTTGTAGCTCCTCGATTACATCCTCGATCGTTGCGTTGGTATCGTCTTCGCCATTCCATTTCAGTTTCGTGCATAGGAACGGTGCTCTCT  
TGGGTAAGCGATATGCTGAACTTGTGCGAGCCTGAACTTGCATCCTCCATTTTTCGAGCCGGATACAGACGTGGAGGTTCTGGANTCGAGGA  
CTGCCCTGTCTCCGAACTGCTAATACCTTTCATCGTCTGTTCTCTGAAGTGTGTTTCGTTTGGTTGANNNGNACCTGGNGCGGCAACGC  
TACTGGTCTCTTTTCTAGACTCGAANAGTTGGAACCTCTCGTGAGCTTANNNNNNNNNNNNN

>off1-13-292\_E05.ab1

NNNNNNNNNNNGNNNTGCCGGCACTGTTTCNTGTGTCAGTCATAAAAAATACACCATTAAACTGCTGTGGTGCAGCCGACTGTGAGACATG  
TTGATCGCGCTCCAGTGACTGAGCTCTAAGCAGACGCGATTCTTTATCGCGTGCCTCATTATGACGTTGAGTATGGCTCGATTTGAAT  
CCTTCGTCTGATAGGCTGCCGACTGCGTGAGTGATGTAGACCTTGTGCCGGCACAGTGCCTGTCTCGGCTGCTGTATGGATCACATCCGGC  
CCTGCAATGACGCCCGGGTGCATTTCATGGGCAATTTCCAGTGGCAAGCTTGTGTCAGGTATATCGAAGTTTGTTCACAACCTCCCGC  
GTCCTCTTCATCTTCAAAAAAGT**CCACCTTGGTTTCGTTGTTAACC**ATCATCAAATCATAAACCAGATCCTTCTCCATCAGATGGGTTTCG  
AAATCAGATGTGCCAGCGATCTTGACTTTTCGCGGCGGTTGCGGCAAAAGGTTTACAGGTACAATCTCGTGTTCGTTTCGAAATTTTCGAGA  
CTGTACAATGCCTGTTTCAGGGATATCATCCACTTGTGATAGAGAATCTCATTCTGGTCTGAAATTTTCGCGCTCTGCATCGTTACAGAT  
GTTTTGTAGCTCCTCGATTACATCCTCGATCGTTGCGTTGGTATCGTCTTCGCCATTCCATTTCAGTTTCGTGCATAGGAACGGTGCTCT  
CTTGGGTAAGCGATATGCTGAACTTGTGCGAGCCTGAACTTGCATCCTCCATTTTTCGAGCCGGATACAGACGTGGAGGTTCTGGAGTCGAG  
GACTGCCCTGTCTCCGAACTGCTAATACCTTTCATCGTCTGTTCTCTGAAGTGTGTTTCGTTTGGTTGAGNNGGTACCTGGCGCGGCAA  
CGCTACTGGNCTCTTTTCTAGACTCGAAGAGTTGGAACCTCTCGTGAGCTTANNNNNNNNNNNNTNNNNN

>off1-14-292\_F05.ab1

NNNNNNNNNNNTGCNGGCACTGTTTCNTGTGTCAGTCATAAAAAATACACCATTAAACTGCTGTGGTGCAGCCGACTGTGAGACATGTTGA  
TCGCGCTCCAGTGACTGAGCTCTAAGCAGACGCGATTCTTTATCGCGTGCCTCATTATGACGTTGAGTATGGCTCGATTTGAATCCTT  
CGTCTGATAGGCTGCCGACTGCGTGAGTGATGTAGACCTTGTGCCGGCACAGTGCCTGTCTCGGCTGCTGTATGGATCACATCCGGCCCTG  
CAATGACGCCCGGGTGCATTTCATGGGCAATTTCCAGTGGCAAGCTTGTGTCAGGTATATCGAAGTTTGTTCACAACCTCCCGCGTCC  
TCTTCATCTTCAAAAAAGT**CCACCTTGGTTTCGTTGTTAACC**ATCATCAAATCATAAACCAGATCCTTCTCCATCAGATGGGTTTCGAAAT  
CAGATGTGCCAGCGATCTTGACTTTTCGCGGCGGTTGCGGCAAAAGGTTTACAGGTACAATCTCGTGTTCGTTTCGAAATTTTCGAGACTGT  
ACAATGCCTGTTTCAGGGATATCATCCACTTGTGATAGAGAATCTCATTCTGGTCTGAAATTTTCGCGCTCTGCATCGTTACAGATGTTT  
TGTAGCTCCTCGATTACATCCTCGATCGTTGCGTTGGTATCGTCTTCGCCATTCCATTTCAGTTTCGTGCATAGGAACGGTGCTCTCTTG

GGTAAGCGATATGCTGAACTTGTGCGAGCCTGAACTTGATCCTCCATTTTTGAGCCGGATACAGACGTGGANGTTCTGGAGTCGAGGACT  
GCCCTGTCTCCGAACTGCTAATAACCTTCATCGTCGTTCTCTGAAGTGTTGTTTTCGTTTTGGTTGNGNNGNACCTGGCGCGGCAACGCTA  
CTGGTCTCTTTTTCTANACTCGAAGANTTGAANTCTCGTGAGCTNNNNNNNNNNNNNNNNNNNNNNNA

>off1-15-292\_G05.ab1

NNNNNNNNNNNNNTTGCNGGCACTGTTTCNTGTGTCAGTCATAAAAAATACACCATTAAACTGCTGTGGTGCAGCCGACTGTGAGACATGTTGA  
TCGCGCTCCAGTGACTGAGCTCTAAGCAGACGCGATTCTTTATCGCGTGCGTCCATTATGACGTTGAGTATGGCTCGATTTGAATCCTT  
CGTCGTAGGCTGCCGACTGCGTGAGTGATGTAGACCTTGTGCCGGCACAGTGCCTGTCTCGGCTGCTGTATGGATCACATCCGGCCCTG  
CAATGACGCCCCGGGTGCGATTTCATGGGCAATTTCCAGTGGCAAGCTTGTTCAGGTATATCGAAGTTTTGTTTTCACAACTCCCGCGTCC  
TCTTCATCTTCAAAAAAGT**CCACCTTGGTTTCGTTGTTAACC**ATCATCAAATCATAACCAGATCCTTCTCCATCAGATGGGTTTCGAAAT  
CAGATGTGCCAGCGATCTTGACTTTTCGCGGGCGGTTGCGGCAAAAAGGTTTACAGGTACAATCTCGTGTTCGTTTCGAAATTTTCGAGACTGT  
ACAATGCCTGTTTCAGGGATATCATCCACTTGTTCAGTATAGAGAATCTCATTCTGGTCTGAAATTTTCGCGCTCTGCATCGTTTCAGATGTTT  
TGTAAGCTCCTCGATTACATCCTCGATCGTTGCGTTGGTATCGTCTTCGCCATTCCCATTTCAGTTCGTGCATAGGAACGGTGTCTCTTG  
GGTAAGCGATATGCTGAACTTGTGCGAGCCTGAACTTGATCCTCCATTTTTGAGCCGGATACAGACGTGGANGTTCTGGAGTCGAGGACT  
GCCCTGTCTCCGAACTGCTAATAACCTTCATCGTCGTTCTCTGAAGTGTTGTTTTCGTTTTGGTTGAGNNGTACCTGGCGCGGCAACGCTA  
CTGGTCTCTTTTTCTANACTCGAAGAGTTGGAACCTCTCGTGAGCTNNNNNNNNCCNNNNNNNNAN

>off1-16-292\_H05.ab1

NNNNNNNNNNNNNTTNNNGCACTGTTTCNTGTGTCAGTCATAAAAAATACACCATTAAACTGCTGTGGTGCAGCCGACTGTGAGACATGTT  
GATCGCGCTCCAGTGACTGAGCTCTAAGCAGACGCGATTCTTTATCGCGTGCGTCCATTATGACGTTGAGTATGGCTCGATTTGAATCC  
TTCGTGTCAGGCTGCCGACTGCGTGAGTGATGTAGACCTTGTGCCGGCACAGTGCCTGTCTCGGCTGCTGTATGGATCACATCCGGCCC  
TGCAATGACGCCCCGGGTGCGATTTCATGGGCAATTTCCAGTGGCAAGCTTGTTCAGGTATATCGAAGTTTTGTTTTCACAACTCCCGCGT  
CCTCTTCATCTTCAAAAAAGT**CCACCTTGGTTTCGTTGTTAACC**ATCATCAAATCATAACCAGATCCTTCTCCATCAGATGGGTTTCGAA  
ATCAGATGTGCCAGCGATCTTGACTTTTCGCGGGCGGTTGCGGCAAAAAGGTTTACAGGTACAATCTCGTGTTCGTTTCGAAATTTTCGAGACT  
GTACAATGCCTGTTTCAGGGATATCATCCACTTGTTCAGTATAGAGAATCTCATTCTGGTCTGAAATTTTCGCGCTCTGCATCGTTTCAGATGT  
TTTGTAGCTCCTCGATTACATCCTCGATCGTTGCGTTGGTATCGTCTTCGCCATTCCCATTTCAGTTCGTGCATAGGAACGGTGTCTCTT  
TGGGTAAGCGATATGCTGAACTTGTGCGAGCCTGAACTTGATCCTCCATTTTTGAGCCGGATACAGACGTGGAGGTTCTGGAGTCGAGGA  
CTGCCCTGTCTCCGAACTGCTAATAACCTTCATCGTCGTTCTCTGAAGTGTTGTTTTCGTTTTGGTTGAGGTGGTACCTGGCGCGGCAACG  
CTACTGGNCTCTTTTTCTAGACTCGAAGAGTTGGAACCTCTCGTGAGCTNNNNNNNNNNNNNNNNNNNNNN

>off1-17-292\_A06.ab1

CNNNNNNNNNNNNNNCGGCACTGTTTCNTGTGTCAGTCATAAAAAATACACCATTAAACTGCTGTGGTGCAGCCGACTGTGAGACATGTTG  
ATCGCGCTCCAGTGACTGAGCTCTAAGCAGACGCGATTCTTTATCGCGTGCGTCCATTATGACGTTGAGTATGGCTCGATTTGAATCCT  
TCGTGTCAGGCTGCCGACTGCGTGAGTGATGTAGACCTTGTGCCGGCACAGTGCCTGTCTCGGCTGCTGTATGGATCACATCCGGCCCT  
GCAATGACGCCCCGGGTGCGATTTCATGGGCAATTTCCAGTGGCAAGCTTGTTCAGGTATATCGAAGTTTTGTTTTCACAACTCCCGCGTC  
CTCTTCATCTTCAAAAAAGT**CCACCTTGGTTTCGTTGTTAACC**ATCATCAAATCATAACCAGATCCTTCTCCATCAGATGGGTTTCGAA  
TCAGATGTGCCAGCGATCTTGACTTTTCGCGGGCGGTTGCGGCAAAAAGGTTTACAGGTACAATCTCGTGTTCGTTTCGAAATTTTCGAGACTG  
TACAATGCCTGTTTCAGGGATATCATCCACTTGTTCAGTATAGAGAATCTCATTCTGGTCTGAAATTTTCGCGCTCTGCATCGTTTCAGATGTT  
TTGTAGCTCCTCGATTACATCCTCGATCGTTGCGTTGGTATCGTCTTCGCCATTCCCATTTCAGTTCGTGCATAGGAACGGTGTCTCTCT  
GGGTAAGCGATATGCTGAACTTGTGCGAGCCTGAACTTGATCCTCCATTTTTGAGCCGGATACAGACGTGGAGGTTCTGGAGTCGAGGAC  
TGCCCTGTCTCCGAACTGCTAATAACCTTCATCGTCGTTCTCTGAAGTGTTGTTTTCGTTTTGGTTGAGGTGGTACCTGGCGCGGCAACG  
TACTGGTCTCTTTTTCTAGACTCGAAGAGTTGGAACCTCTCGTGAGCTNNNNNNNNNNNNNNNNNNNNNN

>off1-18-292\_B06.ab1

NNNNNNNNNNNNNTTGCNGGCACTGTTTCNTGTGTCAGTCATAAAAAATACACCATTAAACTGCTGTGGTGCAGCCGACTGTGAGACATGTTG  
ATCGCGCTCCAGTGACTGAGCTCTAAGCAGACGCGATTCTTTATCGCGTGCGTCCATTATGACGTTGAGTATGGCTCGATTTGAATCCT  
TCGTGTCAGGCTGCCGACTGCGTGAGTGATGTAGACCTTGTGCCGGCACAGTGCCTGTCTCGGCTGCTGTATGGATCACATCCGGCCCT  
GCAATGACGCCCCGGGTGCGATTTCATGGGCAATTTCCAGTGGCAAGCTTGTTCAGGTATATCGAAGTTTTGTTTTCACAACTCCCGCGTC  
CTCTTCATCTTCAAAAAAGT**CCACCTTGGTTTCGTTGTTAACC**ATCATCAAATCATAACCAGATCCTTCTCCATCAGATGGGTTTCGAA  
TCAGATGTGCCAGCGATCTTGACTTTTCGCGGGCGGTTGCGGCAAAAAGGTTTACAGGTACAATCTCGTGTTCGTTTCGAAATTTTCGAGACTG  
TACAATGCCTGTTTCAGGGATATCATCCACTTGTTCAGTATAGAGAATCTCATTCTGGTCTGAAATTTTCGCGCTCTGCATCGTTTCAGATGTT  
TTGTAGCTCCTCGATTACATCCTCGATCGTTGCGTTGGTATCGTCTTCGCCATTCCCATTTCAGTTCGTGCATAGGAACGGTGTCTCTCT  
GGGTAAGCGATATGCTGAACTTGTGCGAGCCTGAACTTGATCCTCCATTTTTGAGCCGGATACAGACGTGGAGGTTCTGGANTCGAGGAC  
TGCCCTGTCTCCGAACTGCTAATAACCTTCATCGTCGTTCTCTGAAGTGTTGTTTTCGTTTTGGNTGAGNNGTACCTGGCGCGGCAACG  
TACTGGTCTCTTTTTCTAGACTCGAAGAGTTGGAACCTCTCGTGAGCTNNNNNNNNNNNNNNNNNNNNNN



>off1-19-292\_C06.ab1

NNNNNNNNNNNNNNNGCNGGCACTGTTTCNTGTCTAGTCATAAAAAATACACCATTAAACTGCTGTGGTGCAGCCGACTGTGAGACATGTTGA  
TCGCGCTCCAGTGACTGAGCTCTAAGCAGACGCGATTCTTTATCGCGTGCCTCATTATGACGTTGAGTATGGCTCGATTTGAATCCTT  
CGTCGTAGGCTGCCGACTGCGTGAGTGATGTAGACCTTGTGCCGGCACAGTGCCTGTCTCGGCTGCTGTATGGATCACATCCGGCCCTG  
CAATGACGCCCCGGGTGCGATTTCATGGGCAATTTCCAGTGGCAAGCTTGTTCAGGTATATCGAAGTTTGTTCACAACCTCCCGCGTCC  
TCTTCATCTTCAAAAAAGT**CCACCTTGGTTTCGTTGTTAACC**ATCATCAAATCATAACCAGATCCTTCTCCATCAGATGGGTTTCGAAAT  
CAGATGTGCCAGCGATCTTGACTTTTCGCGGGCGGTTGCGGCAAAAGGTTTACAGGTACAATCTCGTGTTCGTTTCGAAATTTTCGAGACTGT  
ACAATGCCTGTTTCAGGGATATCATCCACTTGTTCAGTATAGAGAATCTCATTCTGGTCTGAAATTTTCGCGCTCTGCATCGTTTCACGATGTTT  
TGTAAGCTCCTCGATTACATCCTCGATCGTTGCGTTGGTATCGTCTTCGCCATTCCCATTTCAGTTCGTGCATAGGAACGGTGTCTCTTG  
GGTAAGCGATATGCTGAACTTGTGCGAGCCTGAACTTGATCCTCCATTTTTCAGCCGGATACAGACGTGGAGGTTCTGGAGTCGAGGACT  
GCCCTGTCTCCGAACTGCTAATACCTTCATCGTCTGTTCTCTGAAGTGTGTTTCGTTTTGGTTGAGNNGNACCTGGCGCGGCAACGCTA  
CTGGNCTCTTTTCTAGACTCGAAGAGTTGGAACCTNNTCGTGAGTNNNNNNNNNNNNNNNNNNNNNN

>off1-20-292\_D06.ab1

NNNNNNNNNNNNNTGNNGGCACTGTTTCNTGTCTAGTCATAAAAAATACACCATTAAACTGCTGTGGTGCAGCCGACTGTGAGACATGTTGA  
TCGCGCTCCAGTGACTGAGCTCTAAGCAGACGCGATTCTTTATCGCGTGCCTCATTATGACGTTGAGTATGGCTCGATTTGAATCCTT  
CGTCGTAGGCTGCCGACTGCGTGAGTGATGTAGACCTTGTGCCGGCACAGTGCCTGTCTCGGCTGCTGTATGGATCACATCCGGCCCTG  
CAATGACGCCCCGGGTGCGATTTCATGGGCAATTTCCAGTGGCAAGCTTGTTCAGGTATATCGAAGTTTGTTCACAACCTCCCGCGTCC  
TCTTCATCTTCAAAAAAGT**CCACCTTGGTTTCGTTGTTAACC**ATCATCAAATCATAACCAGATCCTTCTCCATCAGATGGGTTTCGAAAT  
CAGATGTGCCAGCGATCTTGACTTTTCGCGGGCGGTTGCGGCAAAAGGTTTACAGGTACAATCTCGTGTTCGTTTCGAAATTTTCGAGACTGT  
ACAATGCCTGTTTCAGGGATATCATCCACTTGTTCAGTATAGAGAATCTCATTCTGGTCTGAAATTTTCGCGCTCTGCATCGTTTCACGATGTTT  
TGTAAGCTCCTCGATTACATCCTCGATCGTTGCGTTGGTATCGTCTTCGCCATTCCCATTTCAGTTCGTGCATAGGAACGGTGTCTCTTG  
GGTAAGCGATATGCTGAACTTGTGCGAGCCTGAACTTGATCCTCCATTTTTCAGCCGGATACAGACGTGGANGTTCTGGAGTCGAGGACT  
GCCCTGTCTCCGAACTGCTAATACCTTCATCGTCTGTTCTCTGAAGTGTGTTTCGTTTTGGTTGNNTGGTACCTGGCGCGGCAACGCTA  
CTGGNCTCTTTTCTAGACTCGAAGANTTGAACCTCTCGTGAGCTTANNNNNNCNNNNNNNN

>off1-21-292\_E06.ab1

NNNNNNNNNNNNNTNNGGCACTGTTTCNTGTCTAGTCATAAAAAATACACCATTAAACTGCTGTGGTGCAGCCGACTGTGAGACATGTTGA  
TCGCGCTCCAGTGACTGAGCTCTAAGCAGACGCGATTCTTTATCGCGTGCCTCATTATGACGTTGAGTATGGCTCGATTTGAATCCTT  
CGTCGTAGGCTGCCGACTGCGTGAGTGATGTAGACCTTGTGCCGGCACAGTGCCTGTCTCGGCTGCTGTATGGATCACATCCGGCCCTG  
CAATGACGCCCCGGGTGCGATTTCATGGGCAATTTCCAGTGGCAAGCTTGTTCAGGTATATCGAAGTTTGTTCACAACCTCCCGCGTCC  
TCTTCATCTTCAAAAAAGT**CCACCTTGGTTTCGTTGTTAACC**ATCATCAAATCATAACCAGATCCTTCTCCATCAGATGGGTTTCGAAAT  
CAGATGTGCCAGCGATCTTGACTTTTCGCGGGCGGTTGCGGCAAAAGGTTTACAGGTACAATCTCGTGTTCGTTTCGAAATTTTCGAGACTGT  
ACAATGCCTGTTTCAGGGATATCATCCACTTGTTCAGTATAGAGAATCTCATTCTGGTCTGAAATTTTCGCGCTCTGCATCGTTTCACGATGTTT  
TGTAAGCTCCTCGATTACATCCTCGATCGTTGCGTTGGTATCGTCTTCGCCATTCCCATTTCAGTTCGTGCATAGGAACGGTGTCTCTTG  
GGTAAGCGATATGCTGAACTTGTGCGAGCCTGAACTTGATCCTCCATTTTTCAGCCGGATACAGACGTGGANGTTCTGGAGTCGAGGACT  
GCCCTGTCTCCGAACTGCTAATACCTTCATCGTCTGTTCTCTGAAGTGTGTTTCGTTTTGGTTGNNTGGTACCTGGCGCGGCAACGCTA  
CTGGTCTCTTTTCTAGACTCGAAGANTTGAACCTCTCGTGAGCTTANNNNNNCNNNNNNNN

>off1-22-292\_F06.ab1

NNNNNNNNNNNNNNNGGCACTGTTTCNTGTCTAGTCATAAAAAATACACCATTAAACTGCTGTGGTGCAGCCGACTGTGAGACATGTTGAT  
CGCGCTCCAGTGACTGAGCTCTAAGCAGACGCGATTCTTTATCGCGTGCCTCATTATGACGTTGAGTATGGCTCGATTTGAATCCTTC  
GTCGTAGGCTGCCGACTGCGTGAGTGATGTAGACCTTGTGCCGGCACAGTGCCTGTCTCGGCTGCTGTATGGATCACATCCGGCCCTGC  
AATGACGCCCCGGGTGCGATTTCATGGGCAATTTCCAGTGGCAAGCTTGTTCAGGTATATCGAAGTTTGTTCACAACCTCCCGCGTCC  
CTTCATCTTCAAAAAAGT**CCACCTTGGTTTCGTTGTTAACC**ATCATCAAATCATAACCAGATCCTTCTCCATCAGATGGGTTTCGAAATC  
AGATGTGCCAGCGATCTTGACTTTTCGCGGGCGGTTGCGGCAAAAGGTTTACAGGTACAATCTCGTGTTCGTTTCGAAATTTTCGAGACTGTA  
CAATGCCTGTTTCAGGGATATCATCCACTTGTTCAGTATAGAGAATCTCATTCTGGTCTGAAATTTTCGCGCTCTGCATCGTTTCACGATGTTT  
GTAGCTCCTCGATTACATCCTCGATCGTTGCGTTGGTATCGTCTTCGCCATTCCCATTTCAGTTCGTGCATAGGAACGGTGTCTCTTG  
GTAAGCGATATGCTGAACTTGTGCGAGCCTGAACTTGATCCTCCATTTTTCAGCCGGATACAGACGTGGANGTTCTGGAGTCGAGGACTG  
CCCTGTCTCCGAACTGCTANACCTTCATCGTCTGTTCTCTGAAGTGTGTTTCGTTTTGGTTGANTGGTACCTGGCGCGGCAACGCTACT  
GGNTCTCTTTTCTAGACTCGAAGAGTTGGAACCTCTCGTGAGCTNNNNNNNCNNNNNNNN

>off1-23-292\_G06.ab1

NNNNNNNNNNNNNNNTNNGGCACTGTTTCNTGTCTAGTCATAAAAAATACACCATTAAACTGCTGTGGTGCAGCCGACTGTGAGACATG  
TTGATCGCGCTCCAGTGACTGAGCTCTAAGCAGACGCGATTCTTTATCGCGTGCCTCATTATGACGTTGAGTATGGCTCGATTTGAAT  
CCTTCGTAGGCTGCCGACTGCGTGAGTGATGTAGACCTTGTGCCGGCACAGTGCCTGTCTCGGCTGCTGTATGGATCACATCCGGC  
CCTGCAATGACGCCCCGGGTGCGATTTCATGGGCAATTTCCAGTGGCAAGCTTGTTCAGGTATATCGAAGTTTGTTCACAACCTCCCGC  
GTCCTCTTCATCTTCAAAAAAGT**CCACCTTGGTTTCGTTGTTAACC**ATCATCAAATCATAACCAGATCCTTCTCCATCAGATGGGTTTCG



TTGGGAGTGTGTGTGTGTGTGTGTTGCGACAGGACACCGGCGGGTTGCCACGTGTGGTTGGTGCGCATCGGCAAACAGTCGGGCATCTAGGGCT  
CCTTGGCAGCGAAACAGTTTAAACAAAACACATGCACACACTGTCAGACCTTTGCAGAGTAAACATTACAGCGTGTGGTACCATTGGCAC  
AACCATAGCCCCGCTGGACAGGCGTTTGCACACTGCAATTANAAAATTATCCACAGCACAAATGAGAGCCGGGGTAAATATTTGTGTCTTG  
CGTTTTGTGCTGGGATANAGAACGGGCTCCCGGTCCCTCATGCCNTATCCCGTTCCANCCAGAAGGGTTGGCAGCTGAACCAACCACAG  
CACTTCTTTGGGGACGCGTGAGTGTGTGTGTGTGTGTGCACAACCNANNCCGNNNNAGCNNNGAGTGTGTGCACAACCNAAACCCNCCNN  
ANCCNNGGAN

Genomic DNA was extracted from a single female individual for each of samples 1-20 and from a single male individual for each of samples 21-25

>off2-1-294\_A07.ab1

NNNNNNNNNNNNCANNNGCGNGGATGGCTCGGAAGAGCAAGCAAAAACGAAGCACGGCACAACAGTTTGGTGTGTTGCGCGCTGTTTCAGCG  
TAATTTAAACACTGCTTGCCACCGTTGTGCAGGGGGGGGGTGGGGACCCTGCCCGCTTCCCGCGCTGGTCCAATGGAAACGGTGTGCA  
AATTTGAGACAAGAGTACCAAGAGCGGACCACGTTCCCTGGCCACTGTCAGCGTTGAAGTCTTTTGTACAGCCACCGTCGCAAATGGTT  
AGCCAGGCGGCCAAGATGGTATGAAATTAATATTCATTAATCTGAATTCCACACCCGTGTGTTTGTGTGTGTGTGTCGATTTCGTGGGC  
TCCGGAAAGTCACGAACACAGCGACAGGACACCGGCGGGTTGCCACGTGTGGTTGGTGCGCATCGGCAGACAGTCGGGCAGCTAGGGCT  
CCTTGGCAGCGAAACAGTTTAAACAAAACACATGCACACACGGTCAGACCTTTGCAGAGTAAAGCATTACAGCGTGTGGTACCATTGGCAC  
AACCATAGCCCCGCTGGACAGGCGTTTGCACACTGCAATTAGAAAATTATCCACAGCACAAATGAGAGCCGGGGTAAATATTTGTGTCTTG  
CGTTTTGTGCTGGGATAGAGAACGGGCTCCCGGTCCCTCATGCCCGTATCCCGTTCCGCCAGAAGGGTTGGCAGCTGAACCAACCACAG  
CACTTCTTTGGGGACGCGTGAGTGTGTGTGTGTGTGNNCACAACCGAANCCGNCNNNNNNNCNGGA

>off2-2-294\_B07.ab1

NNNNNNNNNNNNCANNNGCGNNGANGGCTCGGAAGAAGCAAGCAAAAACGAAGCACGGCACAACAGTTTGGTGTGTTGCGCGCTGTTTCAGC  
GTAATTTAAACACTGCTTGCCACCGTTGTGCAGGGGGGGGGTGGGGACCCTGGCCGCTTCCCGCGCTGGTCCAATGGAAACGGTGTGCA  
AAATTTGAGACAAGAGTACCAAGAGCGGACCACGTTCCCTGGCCACTGTCAGCGTTGAAGTCTTTTGTACAGCCACCGTCGCAAATGGT  
TAGCCAGGCGGCCAAGATGGTATGAAATTAATATTCATTAATCTGAATTCCACACCCGTGTGTTTGTGTGTGTGTGTCGATTTCGTGGG  
CTCCGGAAAGTCACGAACACAGCGACAGGACACCGGCGGGTTGCCACGTGTGGTTGGTGCGCATCGGCAGACAGTCGGGCAGCTAGGGC  
TCCTTGGCAGCGAAACAGTTTAAACAAAACACATGCACACACGGTCAGACCTTTGCAGAGTAAAGCATTACAGCGTGTGGTACCATTGGCA  
CAACCATAGCCCCGCTGGACAGGCGTTTGCACACTGCAATTAGAAAATTATCCACAGCACAAATGAGAGCCGGGGTAAATATTTGTGTCTT  
GCGTTTTGTGCTGGGATAGAGAACGGGCTCCCGGTCCCTCATGCCCGTATCCCGTTCCGCCAGAAGGGTTGGCAGCTGAACCAACCACA  
GCACTTCTTTGGGGACGCGTGAGTGTGTGTGTGTGTGNNNNCANNNGAANCCGCCNNNNCCNGGA

>off2-3-296\_C08.ab1

NNNNNNNNNNNNCANNAGANTGCTGTGGTTGGTTTCAGCTGCCAACCTTCTGGGCGAACGGGATACGGGCATGAGGGACCGGGAGCCC  
GTTCTCTATCCCAGCACAAAACGCAAGACACAAATATTTACCCCGGCTCTCATTTGTGCTGTGGATAATTTTCTAATTGCAGTGCAAAC  
GCCTGTCCGGCGGGCCTATGGTTGTGCCATTGGTACCACACGGTGTAAATGCTTACTCTGCAAAGGTCTGACCGTGTGTGCATGTGTTT  
TGTTAAACTGTTTCGCTGCCAAGGAGCCCTAGCTGCCCGACTGTCTGCCGATGCGCACCAACCACACGTGGCAACCCACCGGTGTCTTG  
TCGCTGTGTTTCGTGACTTTCCGGAGCCCACGAATCAACACACACAAAACACACACACACACACACACACACACACACACACACACACA  
AACACACGGGTGTGGAATTCATATTTAATGAATATTAATTTTCATACCACTTGGCTGCCTGGCTAACCATTTCGACGGTGGCTGTACA  
AAAGACTTCAACGCTGACAGTGGCCAAGAACGTACTCCGCTCTTGGTGACTCTTGTCTCAAATTTGCACACCGTTTCCATTGNACCGCG  
CGGTAAGCGGCCAGGGCNCACAACCCCCCCCCCTGCACAANGGTGGCAAGCAGTGTTTAATTACNCTGAACAGCGCGCAAACACCAAA  
CTGTTTTGCCGTGCTTCNTTTTTGCTTGCTTCTTTNNGAGCCATTCCACCGCCGAGGCANCAACGTGACGTGTTTCNCGNGGNNNNCCCC  
NAANN

>off2-4-296\_D08.ab1

NNNNNNNNNNNNNNNNNANTGCTGTGGTTGGTTTCAGCTGCCAACCTTCTGGGCGAACGGGATACGGGCATGAGGGACCGGGAGCCCC  
TTCTCTATCCCAGCACAAAACGCAAGACACAAATATTTACCCCGGCTCTCATTTGTGCTGTGGATAATTTTCTAATTGCAGTGCAAACG  
CCTGTCCGGCGGGCCTATGGTTGTGCCATTGGTACCACACGGTGTAAATGCTTACTCTGCAAAGGTCTGACCGTGTGTGCATGTGTTTT  
GTTAAACTGTTTCGCTGCCAAGGAGCCCTAGCTGCCCGACTGTCTGCCGATGCGCACCAACCACACGTGGCAACCCACCGGTGTCTCTGT  
CGCTGTGTTTCGTGACTTTCCGGAGCCCACGAATCAACACACACAAAACACACACACACACACACACACACACACACACACACACAA  
ACACACGGGTGTGGAATTCANATTTAATGAATATTAATTTTCATACCACTTGGCTGCCTGGCTAACCATTTCGNACGGTGGCTGNACAA  
AANACTTCAACGCTGACAGTGGCCAAGAACGTANTCCGCTCTTGGTGACTCTTGTCTCAAATTTGCACACCGTTTCCATTGNACCGCGC  
GGTAAGCGGNCAGGGCCACAACCCCCCCCCCTGCACAANGGTGGCAAGCAGTGTTTNATTACNNNNAACAGCGCGCAAACACCAAA  
TGTTTTGCCGTGCTTCNTTTTTGNTTGNNTCTTTNNGAGCCATTCCACCGNNNAGGCAACAACGTGACGTGTTCTCGGGNGGNNNNNN  
NAAAAA

>off2-5-296\_E08.ab1

NNNNNNNNNNNNNNNNNNANTGCTGTGGTTGGTTTCAGCTGCCAACCCCTTCTGGGCGAACGGGATACGGGCATGAGGGACCGGGAGCCCG  
TTCTCTATCCCAGCACAAAACGCAAGACACAAATATTTACCCCGGCTCTCATTTGTGCTGTGGATAATTTTCTAATTGCAGTGCAAACG  
CCTGTCCGGCGGGGCTATGGTTGTGCCATTGGTACCACACGGTGTAAATGCTTACTCTGCAAAGGTCTGACCGTGTGTGCATGTGTTTT  
GTTAAACTGTTTTCGCTGCCAAGGAGCCCTAGCTGCCCCGACTGTCTGCCGATGCGCACCAACCACACGTGGCAACCCACCGGTGTCTGT  
CGCTGTGTTTCGTGACTTTCCGGAGCCACGAATCAACACACACAAAACACACACACACACACACACACACACACACACACACACAA  
ACACACGGGTGTGGAATTCANATTTAATGAATATTAATTTTCATA**CCACCTTGGCTGCCTGGCTAACC**ATTTGCGACGGTGGCTGTACAA  
AANACTTCAACGCTGACAGTGGCCAAGAACGTANTCCGCTCTTGGTGACTCTTGTCTCAAATTTGCACACCGTTTCCATTGGACCGCGC  
GGTAAGCGGCCAGGGCCCACAACCCCCCCCCCTGCACAACGGTGGAAAGCAGTGTTTTTANTTACNCTGAACAGCGCGCAAACACCAAAC  
TGTTTTGCCGTGCTTCNTTTTTTGTGCTTCTTTCCGAGCCATTCCACCGCANNAGGCAGCAACGTGACGTGTTCTCGGGNGNNNNCCNN  
CNAN

>off2-6-294\_F07.ab1

NNNNNNNNNNNNNGGCGNGGNGGCTCGGAAGAAGCAAGCAAAAACGAAGCACGGCACAACAGTTTTGGTGTGTTGCGCGGTGTTGAGCGT  
AATTA AAAACACTGCTTGCCACTGTTGTGCAGGGGGGAGAATTGTGGACCATGCCCGCTTCCCGCGCTGGTCCAATGGAAACGGTGTGCAA  
ATTTGAGACAAGAGTCACCAAGAGCGGACCAGTTCCCTGGCCACTGTCAGCGTTGAAGTCTTTTGTACAGCCACCGTCGCAAAT**GGTTA**  
**GCCAGGCGCCAAGATGG**TATGAAATTAATATTCATTAATCTGAATTCACACCCCGTGTGTTTGTGTGTGTGTGTCGATTTCGTGGGCT  
CCGGAAAGTCACGAACACAGCGACAGGACACCGGCGGGTTGCCACGTGTGGTTGGTGC GCATCGGCAGACAGTCCGGCAGCTAGGGCTC  
CTTGGCAGCGAAACAGTTTAAACAAAACACATGCACACACGGTCAGACCTTTGCAGAGTAAGCATTACAGCGTGTGGTACCATTGGCACA  
ACCATAGCCCCGCTGGACAGGCGTTTGCACCTGCAATTAGAAAATTATCCACAGCACAAATGAGAGCCGGGGTAAATATTTGTGTCTTGC  
GTTTTGTGCTGGGATAGAGAACGGGCTCCCGTCCCTCATGCCCGTATCCCGTTCGCCAGAAGGGTTGGCAGCTGAACCAACCACAGC  
ACTTCTTTGGGGACGCGTGAGTGTGTGTGTGTGTGTGCACAACNNANNNNNNNAANNNNNGGNNN

>off2-7-294\_G07.ab1

NNNNNNNNNNNNNGGCGNGGNGNCTCGGAAGAAGCAAGCAAAAACGAAGCACGGCACAACAGTTTTGGTGTGTTGCGCGCTGTTACGCG  
TAATTA AAAACACTGCTTGCCACCGTTGTGCAGGGGGGGGGTGGGGACCCCTGGCCGCTTCCCGCGCTGGTCCAATGGAAACGGTGTGCA  
AATTTGAGACAAGAGTCACCAAGAGCGGACCAGTTCCCTGGCCACTGTCAGCGTTGAAGTCTTTTGTACAGCCACCGTCGCAAAT**GGTT**  
**AGCCAGGCGCCAAGATGG**TATGAAATTAATATTCATTAATCTGAATTCACACCCCGTGTGTTTGTGTGTGTGTGTCGATTTCGTGGGC  
TCCGGAAAGTCACGAACACAGCGACAGGACACCGGCGGGTTGCCACGTGTGGTTGGTGC GCATCGGCAGACAGTCCGGCAGCTAGGGCT  
CCTTGGCAGCGAAACAGTTTAAACAAAACACATGCACACACGGTCAGACCTTTGCAGAGTAAGCATTACAGCGTGTGGTACCATTGGCAC  
AACCATAGCCCCGCTGGACAGGCGTTTGCACCTGCAATTAGAAAATTATCCACAGCACAAATGAGAGCCGGGGTAAATATTTGTGTCTTG  
CGTTTTGTGCTGGGATAGAGAACGGGCTCCCGTCCCTCATGCCCGTATCCCGTTCGCCAGAAGGGTTGGCAGCTGAACCAACCACAG  
CACTTCTTTGGGGACGCGTGAGTGTGTGTGTGTGTGTGCACAANNANNNCNNNNNNNNCCNGGA

>off2-8-294\_R\_A01.ab1

NNNNNNNNNNNNNNNNNNNGGNTGGCTCGGAAGAAGCAAGCAAAAACGAAGCACGGCAAAAACAGTTTTGGTGTGTTGCGCGCTGTTACAG  
GTAATTA AAAACACTGCTTGCCACCGTTGTGCAGGGGGGGGGTGGGGGCCCTGGCCGCTTACCGCGCGGTCCAATGGAAACGGTGTGCA  
AAATTTGAAACAAGAGTCACCAAGAGCGGACTACGTTCCCTGGCCACTGTCAGCGTTGAAGTCTTTTGTACAGCCACCGTCGCAAAT**GGT**  
**TAGCCAGGCAGCCAAGTGG**TATGAAATTAATATTCATTAATCTGAATTCACACCCCGTGTGTTTGTGTGTGTGTGTGTGTGTGTGTG  
TTTTGTGTGTGTGTGTGTTTGTGTGTGTTGATTCCGGGGGCCCGGAAAGTCACAAACACAGCGACAGGACNCCGGGGGGTTGCCACGT  
GTGGTTGGTGC GCATCGNCAGACAGTCCGGCAGCTAGGNCTCCTTGGCAGCNA AACANTTTAAACAAAACACATGCACACACGGTCANAC  
CTTTGCAGAGAAANCATTACACCGTGTGGNANNNNNGGCACAACCATAGGCCCCCGCNGGACAGGCGTTTGCACCTGCAATTAGAAAATTA  
TCCACAGCACAAATGAGAGCCGGGGNAAATATTTGTGTCTNNGTTTTTGTGCTGNGATAGAGAACGGGCTCCCGTCCCTCATGCCCGT  
ATCCCGTTCGCCAGAAGNTTGGGCAGCTGAACCAACCACAGCANTTCTTTGGGGGACGTGTGTGTGTGNNCACAANCNANCNCCGCN  
NNNNNNNNNGNGN

>off2-9-296\_G08.ab1

NNNNNNNNNNNNNNNAGANTGCTGTGGTTGGTTTCAGCTGCCAACCCCTTCTGGGCGAACGGGATACGGGCATGAGGGACCGGGAGCCCGT  
TCTCTATCCCAGCACAAAACGCAAGACACAAATATTTACCCCGGCTCTCATTTGTGCTGTGGATAATTTTCTAATTGCAGTGCAAACGC  
CTGTCCGGCGGGGCTATGGTTGTGCCATTGGTACCACACGGTGTAAATGCTTACTCTGCAAAGGTCTGACCGTGTGTGCATGTGTTTTG  
TTAAACTGTTTTCGCTGCCAAGGAGCCCTAGCTGCCCCGACTGTCTGCCGATGCGCACCAACCACACGTGGCAACCCACCGGTGTCTGT  
GCTGTGTTTCGTGACTTTCCGGAGCCACGAATCAACACACACAAAACACACACACACACACACACACACACACACACACACACAAA  
CACNCGGTGTGGAATTCANATTTAATGAATATTAATTTTCATA**CCACCTTGGCTGCCTGGCTAACC**ATTTGCGACGGTGGNTGNACAAA  
ANACTTCAACGCTGACAGTGGCCAAGAACGTANTCCGCTCTTGGTGACTCTTGTCTCAAATTTGCACACCGTTTCCANTGNACCGCGCG  
GTAAGCGGCCAGGGCCCACAACCCCCCCCCCTGCACAAGGGGGGCAAGCAGTGTTTTTAATTACGCTNAACAGCGCGCAAACACCAAAC

GT TTTGCCGTGCTTCNNTTNNNNNTTGCTTCTTTCCGAGCCATTCCACCNCNAGGCANCAACGTGACGTGTTCTNNGGGNGNCNNNNAA  
AAAAAA

>off2-10-296\_H08.ab1

NNNNNNNNNNNNCNNNNNNNNANTGCTGTGGTTGGTTTCAGCTGCCAACCCCTTCTGGGCGAACGGGATACGGGCATGAGGGACCGGGAGCC  
CGTTCTCTATCCCAGCACAAAACGCAAGACACAAATATTTACCCCGGCTCTCATTGTGTGTGGATAATTTTCTAATTGCAGTGCAAA  
CGCCTGTCCGGCGGGGCTATGGTTGTGCCATTGGTACCACACGGTGTAAATGCTTACTCTGCAAAGGTCTGACCGTGTGTGCATGTGTT  
TTGTTAAACTGTTTTCGCTGCCAAGGAGCCCTAGCTGCCCGACTGTCTGCCGATGCGCACCAACCACACGTGGCAACCCACCGGTGTCCT  
GTCGCTGTGTTTCGTGACTTTCCGGAGCCACGAATCAACACACACAAAACACACACACACACACACACACACACACACACACACAC  
AAACACACGGGTGTGGAATTCANATTTAATGAATATTAATTTTCATA**CCACCTTGGCTGCCTGGCTAACC**ATTTGCGACGGTGGCTGTAC  
AAAAGACTTCAACGCTGACAGTGGCCAAGAACGTANTCCGCTCTTGGTGACTCTTGTCTCAAATTTGCACACCGTTTCCATTGNACCGC  
GCGGTAAGCGGNCAGGGCCCACAACCCCCCCCCCTGCACAACGGTGGCAAGCAGTGTTTTAATTACGCTNAACAGCGCGCANACACCAA  
AGTGT TTTGCCGTGCTTCTTTTTTGNNTTGCTTCTTNCAGCCATTCCACCGCCNAGGCANCAACGTGACNTGTTNTCGGGNGGCNCCC  
CNNNAAN

>off2-11-294\_C08.ab1

NNNNNNNNNNCNNNGCGNNGNNGNCTCGGAAGAGCAAGCAAAAACGAAGCACGGCACAACAGTTTGGTGTGTCGCGCTGTTTCAGCGTA  
ATTA AACACTGCTTGCCACCGTTGTGCAGGGGGGGGGTGGGGACCATGCCCGCTTCCGCGCTGGTCCAATGGAAACGGTGTGCAAA  
TTTGAGACAAGAGTCACCAAGAGCGGACCACGTTCCCTGGCCACTGTGAGCGTTGAAGTCTTTTGTACAGCCACCGTCGCAAAT**GGTTAG**  
**CCAGGCGCCAAGATGG**TATGAAATTAATATTATTAAATCTGAATTCACACCCCGTGTGTTTGTGTGTGTGTGTCGATTTCGTGGGCTC  
CGGAAAGTCACGAACACAGCGACAGGACACCGGCGGGTTGCCACGTGTGGTTGGTGCGCATCGGCAGACAGTCGGGCAGCTAGGGCTCC  
TTGGCAGCGAAACAGTTTAAACAAAACACATGCACACACGGTCAGACCTTTCAGAGTAAGCATTACAGCGTGTGGTACCATTGGCACAA  
CCATAGCCCCGCTGGACAGGCGTTTGCAGTGAATTAGAAAATTATCCACAGCACAAATGAGAGCCGGGGTAAATATTTGTGTCTTGCG  
TTTTGTGTGGGATAGAGAACGGGCTCCCGGTCCCTCATGCCCGTATCCCGTTCCGCCAGAAGGGTTGGCAGCTGAACCAACCACAGCA  
CTTCTTTGGGGACGCGTGTGTGTGTGTGTGNNNNCAACCNANNCCNNNNNAGCNNNNGA

>off2-12-296\_B09.ab1

NNNNNNNNNNNNCCNNNNANTGCTGTGGTTGGTTTCAGCTGCCAACCCCTTCTGGGCGAACGGGATACGGGCATGAGGGACCGGGAGCCCG  
TTCTCTATCCCAGCACAAAACGCAAGACACAAATATTTACCCCGGCTCTCATTGTGTGTGGATAATTTTCTAATTGCAGTGCAAACG  
CCTGTCCGGCGGGGCTATGGTTGTGCCATTGGTACCACACGGTGTAAATGCTTACTCTGCAAAGGTCTGACCGTGTGTGCATGTGTTTT  
GTTAAACTGTTTTCGCTGCCAAGGAGCCCTAGCTGCCCGACTGTCTGCCGATGCGCACCAACCACACGTGGCAACCCACCGGTGTCCTGT  
CGCTGTGTTTCGTGACTTTCCGGAGCCACGAATCAACACACACAAAACACACACACACACACACACACACACACACACACACACAA  
ACACACGGGTGTGGAATTCATATTTAATGAATATTAATTTTCATA**CCACCTTGGCTGCCTGGCTAACC**ATTTGCGACGGTGGCTGTACAA  
AAGACTTCAACGCTGACAGTGGCCAAGAACGTANTCCGCTCTTGGTGACTCTTGTCTCAAATTTGCACACCGTTTCCATTGNACCGCGC  
GGTAAGCGGNCAGGGCNCACAACCCCCCCCCCTGCACAACGGTGGCAAGCAGTGTTTTAATTACNCTGAACAGCGCGCANACACCAAAC  
TGTTTTGCCGTGCTTCNTTTTTGCTNGCTTCTTTNCAGCCATTCCNCCGCCNAGGCANCAACGTGACGTGTTCTCGGGNGGNCCNNN  
NNNN

>off2-13-296\_C09.ab1

NNNNNNNNNNNNNNNNNNANTGCTGTGGTTGGTTTCAGCTGCCAACCCCTTCTGGGCGAACGGGATACGGGCATGAGGGACCGGGAGCCCG  
TTCTCTATCCCAGCACAAAACGCAAGACACAAATATTTACCCCGGCTCTCATTGTGTGTGGATAATTTTCTAATTGCAGTGCAAACG  
CCTGTCCGGCGGGGCTATGGTTGTGCCATTGGTACCACACGGTGTAAATGCTTACTCTGCAAAGGTCTGACCGTGTGTGCATGTGTTTT  
GTTAAACTGTTTTCGCTGCCAAGGAGCCCTAGCTGCCCGACTGTCTGCCGATGCGCACCAACCACACGTGGCAACCCACCGGTGTCCTGT  
CGCTGTGTTTCGTGACTTTCCGGAGCCACGAATCAACACACACAAAACACACACACACACACACACACACACACACACACACACAA  
ACACACGGGTGTGGAATTCANATTTAATGAATATTAATTTTCATA**CCACCTTGGCTGCCTGGCTAACC**ATTTGCGACGGTGGGTGTACAA  
AANACTTCAACGCTGACAGTGGCCAAGAACGTACTCCGCTCTTGGTGACTCTTGTCTCAAATTTGCACACCGTTTCCATTGNACCGCGC  
GGTAAGCGGNCAGGGCCCACAACCCCCCCCCCTGCACAAGGGGGCAANNNGTGTTTTTATTACGCTNAACAGCGCGCAAACACCAAAC  
TGTTTTGCCGNGCTTCNNTTNNNCTTGNNTCTTTNNGAGCCANTCCACCGCANNAGNNANCAACGTGACNTGTTCTCGGGGGNNCCNNN  
AAAAAA

>off2-14-294\_F08.ab1

NNNNNNNNNNNNCNNNGCGGTGGATGGCTCGGAAGAAGCAAGCAAAAACGAAGCACGGCACAACAGTTTGGTGTGTCGCGCTGTTTCAG  
CGTAATTA AACACTGCTTGCCACCGTTGTGCAGGGGGGGGGTGGGGACCN TGCCGCTTCCGCGCTGGTCCAATGGAAACGGTGTG  
CAAATTTGAGACAAGAGTCACCAAGAGCGGACCACGTTCCCTGGCCACTGTGAGCGTTGAAGTCTTTTGTACAGCCACCGTCGCAAAT**GG**  
**TTAGCCAGGCGGCAAGATGG**TATGAAATTAATATTATTAAATCTGAATTCACACCCCGTGTGTTTGTGTGTGTGTGTCGATTTCGTGG  
GCTCCGGAAAGTCACGAACACAGCGACAGGACACCGGCGGGTTGCCACGTGTGGTTGGTGCGCATCGGCAGACAGTCGGGCAGCTAGGG

CTCCTTGGCAGCGAAACAGTTTAAACAAAACACATGCACACACGGTCAGACCTTTGCAGAGTAAGCATTACAGCGTGTGGTACCATTGGC  
ACAACCATAGCCCCGCTGGACAGGCGTTTGCCTGCAATTAGAAAATTATCCACAGCACAAATGAGAGCCGGGGTAAATATTTGTGTCT  
TGCGTTTTGTGCTGGGATAGAGAACGGGCTCCCGGTCCCTCATGCCCGTATCCCGTTTCGCCAGAAGGGTTGGCAGCTGAACCAACCAC  
AGCACTTCTTTGGGGACGCGTGAGTGTGTGTGTGTGTGTGCACAACCNAACNGNNNNNAACNNCGGGA

>off2-15-294\_G08.ab1

NNNNNNNNNNNNCNGGCGGNGGATGGCTCGGAAGAAGCAAGCAAAAACGAAGCACGGCACAACAGTTTGGTGTTTGCGCGCTGTTTCAGC  
GTAATTTAAACACTGCTTGCCACCGTTTGTGCAGGGGGGGGGTGGGGACCNTGGCCGCTTCCCGCGCTGGTCCAATGGAAACGGTGTGC  
AAATTTGAGACAAGAGTCACCAAGAGCGGACCACGTTTCTGGCCACTGTCAGCGTTGAAGTCTTTTGTACAGCCACCGTCGCAAATGGT  
TAGCCAGGCGGCCAAGATGGTATGAAATTAATATTCATTAAATCTGAATTCACACCCCGTGTGTTTGTGTGTGTGTGTCGATTTCGTGGG  
CTCCGGAAAGTCACGAACACAGCGACAGGACACCGGCGGGTTGCCACGTGTGGTTGGTGCATCGGCAGACAGTCGGGCAGCTAGGGC  
TCCTTGGCAGCGAAACAGTTTAAACAAAACACATGCACACACGGTCAGACCTTTGCAGAGTAAGCATTACAGCGTGTGGTACCATTGGCA  
CAACCATAGCCCCGCTGGACAGGCGTTTGCCTGCAATTAGAAAATTATCCACAGCACAAATGAGAGCCGGGGTAAATATTTGTGTCTT  
GCGTTTTGTGCTGGGATAGAGAACGGGCTCCCGGTCCCTCATGCCCGTATCCCGTTTCGCCAGAAGGGTTGGCAGCTGAACCAACCACA  
GCACTTCTTTGGGGACGCGTGAGTGTGTGTGTGTGTGTGCACNACCGAANCCNNNNNAANCCNNGGA

>off2-16-294\_H08.ab1

NNNNNNNNNNCNCNGCGGNGGATGGCTCGGAAGAAGCAAGCAAAAACGAAGCACGGCACAACAGTTTGGTGTTTGCGCGCTGTTTCAGC  
GTAATTTAAACACTGCTTGCCACCGTTTGTGCAGGGGGGGGGTGGGGACCNTGGCCGCTTCCCGCGCTGGTCCAATGGAAACGGTGTGC  
AAATTTGAGACAAGAGTCACCAAGAGCGGACCACGTTTCTGGCCACTGTCAGCGTTGAAGTCTTTTGTACAGCCACCGTCGCAAATGGT  
TAGCCAGGCGGCCAAGATGGTATGAAATTAATATTCATTAAATCTGAATTCACACCCCGTGTGTTTGTGTGTGTGTGTCGATTTCGTGGG  
CTCCGGAAAGTCACGAACACAGCGACAGGACACCGGCGGGTTGCCACGTGTGGTTGGTGCATCGGCAGACAGTCGGGCAGCTAGGGC  
TCCTTGGCAGCGAAACAGTTTAAACAAAACACATGCACACACGGTCAGACCTTTGCAGAGTAAGCATTACAGCGTGTGGTACCATTGGCA  
CAACCATAGCCCCGCTGGACAGGCGTTTGCCTGCAATTAGAAAATTATCCACAGCACAAATGAGAGCCGGGGTAAATATTTGTGTCTT  
GCGTTTTGTGCTGGGATAGAGAACGGGCTCCCGGTCCCTCATGCCCGTATCCCGTTTCGCCAGAAGGGTTGGCAGCTGAACCAACCACA  
GCACTTCTTTGGGGACGCGTGAGTGTGTGTGTGTGTGTGTNNNCAACCNANNCNGNCCNNAANCCNNGNN

>off2-17-294\_B09.ab1

NNNNNNNNNNCNCNNGCGGTGGATGGCTCGGAAGAAGCAAGCAAAAACGAAGCACGGCACAACAGTTTGGTGTTTGCGCGCTGTTTCAGC  
GTAATTTAAACACTGCTTGCCACCGTTTGTGCAGGGGGGGGGTGGGGACCNTGGCCGCTTCCCGCGCTGGTCCAATGGAAACGGTGTGC  
AAATTTGAGACAAGAGTCACCAAGAGCGGACCACGTTTCTGGCCACTGTCAGCGTTGAAGTCTTTTGTACAGCCACCGTCGCAAATGGT  
TAGCCAGGCGGCCAAGATGGTATGAAATTAATATTCATTAAATCTGAATTCACACCCCGTGTGTTTGTGTGTGTGTGTCGATTTCGTGGG  
CTCCGGAAAGTCACGAACACAGCGACAGGACACCGGCGGGTTGCCACGTGTGGTTGGTGCATCGGCAGACAGTCGGGCAGCTAGGGC  
TCCTTGGCAGCGAAACAGTTTAAACAAAACACATGCACACACGGTCAGACCTTTGCAGAGTAAGCATTACAGCGTGTGGTACCATTGGCA  
CAACCATAGCCCCGCTGGACAGGCGTTTGCCTGCAATTAGAAAATTATCCACAGCACAAATGAGAGCCGGGGTAAATATTTGTGTCTT  
GCGTTTTGTGCTGGGATAGAGAACGGGCTCCCGGTCCCTCATGCCCGTATCCCGTTTCGCCAGAAGGGTTGGCAGCTGAACCAACCACA  
GCACTTCTTTGGGGACGCGTGAGTGTGTGTGTGTGTGTGTGCACAACCNANNCNNNNNAGCCNNGGA

>off2-18-294\_C09.ab1

NNNNNNNNNNNNNGGCGGNGNNGGCTCGGAAGAGCAAGCAAAAACGAAGCACGGCACAACAGTTTGGTGTTTGCGCGCTGTTTCAGCGT  
AATTTAAACACTGCTTGCCACCGTTTGTGCAGGGGGGGGGTGGGGACCNTGGCCGCTTCCCCGCTGGTCCAATGGAAACGGTGTGCAA  
ATTTGAAACAAGAGTCACCAAGAGCGGACCACGTTTCTGGCCACTGTCAGCGTTGAAGTCTTTTGTACAGCCACCGTCGCAAATGGTTA  
GCCAGGCGGCCAAGATGGTATGAAATTAATATTCATTAAATCTGAATTCACACCCCGTGTGTTTGTGTGTGTGTGTCGATTTCGTGGGCT  
CCGGAAAGTCACGAACACAGCGACAGGACACCGGCGGGTTGCCACGTGTGGTTGGTGCATCGGCAGACAGTCGGGCAGCTAGGGCTC  
CTTGGCAGCGAAACAGTTTAAACAAAACACATGCACACACGGTCAGACCTTTGCAGAGTAAGCATTACAGCGTGTGGTACCATTGGCACA  
ACCATAGCCCCGCTGGACAGGCGTTTGCCTGCAATTAGAAAATTATCCACAGCACAAATGAGAGCCGGGGTAAATATTTGTGTCTTGC  
GTTTTGTGCTGGGATAGAGAACGGGCTCCCGGTCCCTCATGCCCGTATCCCGTTTCGCCAGAAGGGTTGGCAGCTGAACCAACCACAGC  
ACTTCTTTGGGGACGCGTGAGTGTGTGTGTGTGTGTGTGCACAACCGAANCCNNAANCCNNGGA

>off2-19-294\_D09.ab1

NNNNNNNNNNCNCNGCGGNGGNGGCTCGGAAGAGCAAGCAAAAACGAAGCACGGCACAACAGTTTGGTGTTTGCGCGCTGTTTCAGCGTA  
ATTTAAACACTGCTTGCCACCGTTTGTGCAGGGGGGGGGTGGGGACCNTGGCCGCTTCCCGCGCTGGTCCAATGGAAACGGTGTGCAA  
TTTGTGAGACAAGAGTCACCAAGAGCGGACCACGTTTCTGGCCACTGTCAGCGTTGAAGTCTTTTGTACAGCCACCGTCGCAAATGGTTAG  
CCAGGCGGCCAAGATGGTATGAAATTAATATTCATTAAATCTGAATTCACACCCCGTGTGTTTGTGTGTGTGTGTCGATTTCGTGGGCTC  
CGGAAAGTCACGAACACAGCGACAGGACACCGGCGGGTTGCCACGTGTGGTTGGTGCATCGGCAGACAGTCGGGCAGCTAGGGCTCC  
TTGGCAGCGAAACAGTTTAAACAAAACACATGCACACACGGTCAGACCTTTGCAGAGTAAGCATTACAGCGTGTGGTACCATTGGCACA

CCATAGCCCCGCTGGACAGGCGTTTGCCTGCAATTAGAAAATTATCCACAGCACAAATGAGAGCCGGGGTAAATATTTGTGTCTTGCG  
TTTTGTGTGGGATAGAGAACGGGCTCCCGGTCCCTCATGCCCCTATCCCCTCGCCAGAAGGGTTGGCAGCTGAACCAACCACAGCA  
CTTCTTTGGGGACGCGTGAGTGTGTGTGTGTGTGTGCACAANNCNANNCCNNAANNCCNGGA

>off2-20-294\_E09.ab1

NNNNNNNNNNNNCNGGCGGNGGANGGCTCGGAAGAAGCAAGCAAAAACGAAGCACGGCACAACAGTTTGGTGTGGCGCGCTGTTTCAGC  
GTAATTAACAACTGCTTGCCACCGTTGTGCAGGGGGGGGGTGGGGACCCTGCCCGCTTCCCGCGCTGGTCCAATGGAAACGGTGTGC  
AAATTTGAGACAAGAGTCACCAAGAGCGGACCACGTTTCTGGCCACTGTCAGCGTTGAAGTCTTTTGTACAGCCACCGTCGCAAATGGT  
TAGCCAGGCGGCCAAGATGGTATGAAATTAATATTCATTAATCTGAATTCACACCCCGTGTGTTTGTGTGTGTGTGTGCGATTTCGTGGG  
CTCCGGAAAGTCACGAACACAGCGACAGGACACCGGCGGGTTGCCACGTGTGGTTGGTGCATCGGCAGACAGTCGGGCAGCTAGGGC  
TCCTTGGCAGCGAAACAGTTTAAACAAAACACATGCACACACGGTCAGACCTTTGCAGAGTAAGCATTACAGCGTGTGGTACCATTGGCA  
CAACCATAGCCCCGCTGGACAGGCGTTTGCCTGCAATTAGAAAATTATCCACAGCACAAATGAGAGCCGGGGTAAATATTTGTGTCTT  
GCGTTTTGTGTGGGATAGAGAACGGGCTCCCGGTCCCTCATGCCCCTATCCCCTCGCCAGAAGGGTTGGCAGCTGAACCAACCACA  
GCACTTCTTTGGGGACGCGTGAGTGTGTGTGTGTGTGTGTGCACAANNNNANNCCNCCNNNNNCCGGGA

>off2-21-296\_D09.ab1

NNNNNNNNNNNNNANANTGCTGTGGTTGGTTCAGCTGCCAACCCCTTCTGGGCGAACGGGATACGGGCATGAGGGACCGGGAGCCCCGT  
CTCTATCCCAGCACAAAACGCAAGACACAAATATTTACCCCGGCTCTCATTTGTGTGTGGATAATTTTCTAATTGCAGTGCAAACGCC  
TGTCGGCGGGGGCTATGGTTGTGCCATTGGTACCACACGGTGTAAATGCTTACTCTGCAAAGGTCTGACCGTGTGTGCATGTGTTTTGT  
TAAACTGTTTTCGCTGCCAAGGAGCCCTAGCTGCCCGACTGTCTGCCGATGCGCACCAACCACACGTGGCAACCCACCGGTGTCTGTG  
CTGTGTTTCGTGACTTTCCGGAGCCACGAATCAACACACACAAAACACACACACACACACACACACACACACACACACACACAAAC  
ACACGGGTGTGGAATTCATATTTAATGAATATTAATTTTATACCCACTTGGCTGCCTGGCTAACCATTGCGACGGTGGCTGTACAAA  
GACTTCAACGCTGACAGTGGCCAAGAACGTANTCCGCTCTTGGTACTCTTGTCTCAAATTTGCACACCGTTTCCATTGNACCGCGCG  
TAAGCGGCCAGGGCCACAACCCCCCCCCCTGCACAACGGTGGCAAGCAGTGTTTAATTACGCTGAACAGCGCGCACACACCAAACTG  
TTTTGCCGNGCTTCGTTTTTGTCTTCTTTNNGAGCCATTCCNCCGCAGAGGCANCAACGTGACGTGNTCTCGGGNNGNNNNNNNN  
AANA

>off2-22-296\_E09.ab1

NNNNNNNNNNNNNNNGANTGCTGTGGTTGGTTCAGCTGCCAACCCCTTCTGGGCGAACGGGATACGGGCATGAGGGACCGGGAGCCCC  
TTCTCTATCCCAGCACAAAACGCAAGACACAAATATTTACCCCGGCTCTCATTTGTGTGTGGATAATTTTCTAATTGCAGTGCAAACG  
CCTGTCCGGCGGGGGCTATGGTTGTGCCATTGGTACCACACGGTGTAAATGCTTACTCTGCAAAGGTCTGACCGTGTGTGCATGTGTTTT  
GTTAAACTGTTTTCGCTGCCAAGGAGCCCTAGCTGCCCGACTGTCTGCCGATGCGCACCAACCACACGTGGCAACCCACCGGTGTCTGT  
CGCTGTGTTTCGTGACTTTCCGGAGCCACGAATCAACACACACAAAACACACACACACACACACACACACACACACACACACACAA  
ACACACGGGTGTGGAATTCATATTTAATGAATATTAATTTTATACCCACTTGGCTGCCTGGCTAACCATTGCGACGGTGGNTGTACAA  
AAGACTTCAACGCTGACAGTGGCCAAGAACGTANTCCGCTCTTGGTACTCTTGTCTCAAATTTGCACACCGTTTCCATTGNACCGCGC  
GGTAAGCGGNCAGGGCCACAACCCCCCCCCCTGCACAANGGTGGCAAGCAGTGTTTAATTACNCTGAACAGCGCGCANACACCAAAAC  
TGTTTTGCCGNGCTTCNTTTTTTGTCTTCTTTNNGAGCCATTCCACCGCCGAGGCANAACGTGACGNGTTCTCGGGTGNNNNNNNNA  
NAN

>off2-23-294\_H09.ab1

NNNNNNNNNNNNCNGGCGGNGGATGGCTCGGAAGAGCAAGCAAAAACGAAGCACGGCAAAAACAGTTTGGTGTGGCGCGCTGTTTCAGCG  
TAATTAACAACTGCTTGCCACCGTTGTGCAGGGGGGGGGTGGGGACCCTGGCCGCTTCCCGCGCTGGTCCAATGGAAACGGTGTGCA  
AATTTGAGACAAGAGTCACCAAGAGCGGACCACGTTTCTGGCCACTGTCAGCGTTGAAGTCTTTTGTACAGCCACCGTCGCAAATGGT  
AGCCAGGCGGCCAAGATGGTATGAAATTAATATTCATTAATCTGAATTCACACCCCGTGTGTTTGTGTGTGTGTGCGATTTCGTGGGC  
TCCGGAAAGTCACGAACACAGCGACAGGACACCGGCGGGTTGCCACGTGTGGTTGGTGCATCGGCAGACAGTCGGGCAGCTAGGGCT  
CCTTGGCAGCGAAACAGTTTAAACAAAACACATGCACACACGGTCAGACCTTTGCAGAGTAAGCATTACAGCGTGTGGTACCATTGGCAC  
AACCATAGCCCCGCTGGACAGGCGTTTGCCTGCAATTAGAAAATTATCCACAGCACAAATGAGAGCCGGGGTAAATATTTGTGTCTTG  
CGTTTTGTGTGGGATAGAGAACGGGCTCCCGGTCCCTCATGCCCCTATCCCCTCGCCAGAAGGGTTGGCAGCTGAACCAACCACAG  
CACTTCTTTGGGGACGCGTGAGTGTGTGTGTGTGTGTGTGCACAACCGAANCCNANNNGANCCNNGN

>off2-24-296\_F09.ab1

NNNNNNNNNNNNCTNCCGCTCNNNNNAAGTGTGTGGTTGGTTCAGCTGCCAACCCCTTCTGGGCGAACGGGATACGGGCATGAGGGACC  
GGGAGCCCCGTTCTCTATCCCAGCACAAAACGCAAGACACAAATATTTACCCCGGCTCTCATTTGTGTGTGGATAATTTTCTAATTGCA  
GTGCAAACGCCTGTCCAGCGGGGCTATGGTTGTGCCAATGGTACCACACGCTGTAAATGCTTACTCTGCAAAGGTCTGACCGTGTGTGCA  
TGTGTTTTGTTAACTGTTTTCGCTGCCAAGGAGCCCTAGCTGCCCGACTGTCTGCCGATGCGCACCAACCACACGTGGCAACCCGCCGG  
TGTCTGTGCTGTGTTTCGTGACTTTCCGGAGCCACGAATCGACACACACACACAAAACACACGGGTGTGGAATTCAGATTTAATGAAT

ATTAATTTTCATACCATCTTGGCCGCTGGCTAACCATTTGCGACGGTGGCTGTACAAAAGACTTCAACGCTGACAGTGCCAGGAACGT  
GGTCCGCTCTTGGTGACTCTTGTCTCAAATTTGCACACCGTTTCCATTGGACCAGCGCGGGAAGCGGGCATGGTCCACAATTCTCCCC  
TGCACAACAGTGGCAAGCAGTGTTTTAATTACGCTCAACACCGCGCAAACACCAAACCTGTTGTGCCGTGCTTCGTTTTTTGCTTGCTTCT  
TTCCGAGCCATTCCACCGCCGAGACAGCAACGTGACGTGTTCTNNNNNNNNNNCNCNNANNNN

>off2-25-296\_G09.ab1

NNNNNNNNNNNNNNNNNNNNNGCTGTGGTTGGTTTACGCTGCCAACCCCTTCTGGGCGAACGGGATACGGGCATGAGGGACCGGGAGCCC  
GTTCTCTATCCCAGCACAAAACGCAAGACACAAATATTTACCCCGGCTCTCATTTGTGCTGTGGATAATTTTCTAATTGCAGTGCAAAC  
GCCTGTCCGGCGGGGCTATGGTTGTGCCATTGGTACCACACGGTGTAAATGCTTACTCTGCAAAGGTCTGACCGTGTGTGCATGTGTTT  
TGTTAAACTGTTTCGCTGCCAAGGAGCCCTAGCTGCCCGACTGTCTGCCGATGCGCACCAACCACACGTGGCAACCCACCGGTGTCCTG  
TCGCTGTGTTTCGTGACTTTCCGGAGCCCACGAATCAACACACACAAAACACACACACACACACACACACACACACACACACACACA  
AACACACGGGTGTGGAATTCANATTTAATGAATATTAATTTTCATACCATCTTGGCTGGCTAACCATTTGCGACGGTGGNTGTACA  
AAAGACTTCAACGCTGACAGTGCCCAAGAACGTACTCCGCTCTTGGTGACTCTTGTCTCAAATTTGCACACCGTTTCCATTGGACCGCG  
CGGTAAGCGGCCAGGGCCACAACCCCCCCCCCTGCACAANGGGGGCAAGCAGTGTTTTAAANTACNNNNAACAGCGCGCAAACACCAA  
ACTGTTTTGCCGTGCTTCNTTTTTGNTTGNNTCTTTCCGAGCCNNCCNCCGCCGAGGCANCAACGTGACGTGTTCTCGGGGGGNNC  
NNNA

### Off-target 3:

Sense: 5'-GGTTAGCGAAGATGGCATTGTGG-3', Antisense: 5'-CCACAATGCCATCTTCGCTAACC-3'

### WT genomic DNA extracted from 10 females

>wt1-300\_H09.ab1

NNNNNNNNNNNNNNNNNNNANCCGGCCGCGCCAGCCCGTACTCGGTGCTGTTTCGCCCGCTCGATCACCTCGTCCAGCGTGCTGAACTTCAAGGAT  
GCTCTGCACCGGGCCAAAGATTTCTCGCGCGCAATCTTCATGCCGTCCGGTACGTTTCGAGAAGACGGTCCGGCTCCACGAAGTAGCCCA  
CCGTACCGGCACGCTTGGCACCGGCCTGCAGCTGGGCGCCCTCGGCCTGGGCGGACTCAATGTAGCCGAGAATCTTTTTGAACTGCTCC  
TCGTCCACCTGCGGTCCCTGCTGGACGCCGTCTTGAACGCATTGCCACCTTGCCTGCGCTGGCGGGCCATTTAGCCGCTTCGCCACGAA  
CGCATCGTAGATGCCCTCCTGCACGAACGTGCGGCTACCGGCGCAGCAGTTCTGGCCGTGGTTAGCGAAGATGGCAATTT  
CAACCGCTTCGTCCACTGAAACAACAATCAAACAAGAATGTTATTAGCGCCCACTGCAATGCTTCGCAACGCTTCGGATTCCGCACTTA  
CGATCAGCATCGTTGAAGATCACCAGCGGGCTCTTGGCGCCAGCTCGAGCGAAACCTTCTTCAGGTTGGACGTGGACGCCCGCTCAG  
GATGATGCGGCGCGTCTCGACCGACCCGGTGAACGCCACCTTCCGGATGTCCGGGTGGGCGACGATCGCGGCACCGACCGTCCGCGCCGA  
ACCGGTTTACCACGTTGATCACGCCGTCCGGAAATCCGGCCTCCTTCGACAGCGCCGCCATGTGCAGTGCCTCAGCGGTGTCTGTTTCG  
GCCGGTTTTAGCACCAGCGTGCAGCCGGCCGCAAGGCCGGCGCCCACTTCCAGGTGATCANGATCGGATAGTTCCAGGGGATGAT  
CTGCCCGACGACGCCGACCGGTTTCTTGGCGGATGTACGTGAGANCGNCCNNNNNNNNNNNNNNNNNNNNNNNNNNNNNNNNNNNNNN

### WT genomic DNA extracted from 4 males and 4 females

>wt2-300\_B07.ab1 ()

NNNNNNNNNNNNNNNNNNNNNNNNNNNCCGCCAGCCCGTACTCGGTGCTGTTTCGCCCGCTCGATCACCTCGTCCAGCGTGCTGAACTTCAAGGAT  
GATGCTCTGCACCGGGCCAAAGATTTCTCGCGCGCAATCTTCATGCCGTCCGGTACGTTTCGAGAAGACGGTCCGGCTCCACGAAGTAGC  
CCACCGTACCGGCACGCTTGGCACCGGCCTGCAGCTGGGCGCCCTCGGTCTGGGCGGACTCGATGTAGCCGAGAATCTTTTTGAACTGC  
TCCTCGTCCACCTGCGGTCCCTGCTGGACGCCGTCTTGAACGCATCGCCACCTTGCCTGCGGTGGCGGGCCATTTAGCCGCTTCGCCAC  
GAACGCATCGTAGATGCCCTCCTGCACGAACGTGCGGCTACCGGCGCAGCAGTTCTGGCCGTGGTTAGCGAAGATGGCAATTT  
ATTTCAACCGCTTCGTCCACTGAAACAACAATCAAACAAGAATGTTATTAGCGCCCACTGCAATGCTTCGCAACGCTTCGGATTCCGCA  
CTTACGATCAGCATCGTTGAAGATCACCAGCGGGCTCTTGGCGCCAGCTCGAGCGAAACCTTCTTCAGGTTGGACGTGGACGCCCGC  
TCAGGATGATGCGGCGCGTCTCGACCGACCCGGTGAACGCCACCTTCCGGANGTCCGGGTGGGCGACGATCGCGGCACCGACCGTCCGGC  
CCGAACCGGTTTACCACGTTGATCACGCCGTCCGGAAATCCGGCCTCCTTCGACAGCGCCGCCATGTGCAGTGCCTCAGCGGTGTCTG  
TTCGGCCGGTTTTAGCACCAGCGTGCAGCCGGCCGCAAGGCCGGCGCCCACTTCCAGGTGATCANGATCGGATAGTTCCAGGGGATGAT  
TGATCTGNCCGACGACGCCGACCGGNTTCTTGGCGGATGTACGTGANAACCGGTCGNCGNNNNNGGCCNCCNGNNA

Genomic DNA extracted from a single female individual for each of samples 1-20 and from a single male individual for each of samples 21-25



>off3-1-300\_A04.ab1

NNNNNNNNNNNNNNANNNNCGGCCGCCAGCCCGTACTCGGTGCTGTTGCGCCGCTCGATCACCTCGTCCAGCGTGCTGAACTTCAGGATGCTCTGCACCGGGCCAAAGATTTCTCGCGCGCAATCTTTCATGCCGTGCGGTACGTTTCGAGAAGACGGTTCGGCTCCACGAAGTAGCCACCGTACCGGCACGCTTGCCACCGGCCTGCAGCTGGGCGCCCTCGGTCTGGGCGGACTCGATGTAGCCGAGAATCTTTTTGAACTGCTCCTCGTCCACCTGCGGTCCCTGCTGGACGCCGTCTTGAACGCATCGCCACCTTTCGCTGGCGGGCCATTTTCAGCCGCCTTCGCCACGAACGCATCGTAGATGCCCTCCTGCACGAACGTGCGGCTACCGGCGCAGCAGTTCTGGCCGTGGTTAGCGAAGATGGCATTGTGGGCAATTTCAACCGCTTCGTCCACTGAAACAACAATCAAACAAGAATGTTATTAGCGCCACTGCAATGCTTCGCAACGCTTCGGATTCCGCACCTTACGATCAGCATCGTTGAAGATCACCAGCGGGCTCTTGGCGCCAGCTCGAGCGAAACCTTCTTCAGGTTGGACGTGGACGCCCGCTCAGGATGATGCGGCCCGTCTCGACCGACCGGTGAACGCCACCTTCCGGATGTCCGGGTGGGCGACGATCGCGGCACCGACCGTCCGGCCGAAACCGTTACCACGTTGATCAGCCGTCCGGAAATCCGGCCTCCTTCGACAGCGCCGCCATGTGCAGTGCAGTGCAGCGGTGTCTGTTCCGGTTTCAGCACCAGCGTGCAGCCGGCCGCCANGNCGGCGCCACTTCCNNTCAGCATCANNNTCGGATAGTTCCAGGGATGATCTGCCCGACGACGCCGACCGGTTCTTGGCGATGTACGTGAGAACCGGTCCGTCCNNNNNGCNACNNNAANNA

>off3-2-300\_B04.ab1

NNNNNNNNNNNNNNANNNNNGGCCGCCAGCCCGTACTCGGTGCTGTTGCGCCGCTCGATCACCTCGTCCAGCGTGCTGAACTTCAGGATGCTCTGCACCGGGCCAAAGATTTCTCGCGCGCAATCTTTCATGCCGTGCGGTACGTTTCGAGAAGACGGTTCGGCTCCACGAAGTAGCCACCGTACCGGCACGCTTGCCACCGGCCTGCAGCTGGGCGCCCTCGGCCTGGGCGGACTCAATGTAGCCGAGAATCTTTTTGAACTGCTCCTCGTCCACCTGCGGTCCCTGCTGGACGCCGTCTTGAACGCATTGCCACCTTTCGCTGGCGGGCCATCTCAGCCGCCTTCGCCACGAACGCATCGTAGATGCCCTCCTGCACGAACGTGCGGCTACCGGCGCAGCAGTTCTGTCCGTGGTTAGCGAAGATGGCATTGTGGGCAATTTCAACCGCTTCGTCCACTGAAACAACAATCAAACAAGAATGTTATTAGCGCCACTGCAATGCTTCGCAACGCTTCGGATTCCGCACCTTACGATCAGCATCGTTGAAGATCACCAGCGGGCTCTTGGCGCCAGCTCGAGCGAAACCTTCTTCAGGTTGGACGTGGACGCCCGCTCAGGATGATGCGGCCCGTCTCGACCGACCGGTGAACGCCACCTTCCGGATGTCCGGGTGGGCGACGATCGCGGCACCGACCGTCCGGCCGAAACCGTTACCACGTTGATCAGCCGTCCGGAAATCCGGCCTCCTTCGACAGCGCCGCCATGTGCAGTGCAGTGCAGCGGTGTCTGTTCCGGTTTCAGCACCAGCGTGCAGCCGGCCGCCAAGGNCGGCGCCACTTCCAGGTGAGCATCAGTATCGGATAGTTCCAGGGATGATCTGCCCGACGACGCCGACCGGTTCTTGGCGATGTACGTGAGAACCGGTCCGTCCNNNNNGGNCACNNNTAAAAA

>off3-3-300\_C04.ab1

NNNNNNNNNNNNNNANANNCGGNCGCCAGCCCGTACTCGGTGCTGTTGCGCCGCTCGATCACCTCGTCCAGCGTGCTGAACTTCAGGATGCTCTGCACCGGGCCAAAGATTTCTCGCGCGCAATCTTTCATGCCGTGCGGTACGTTTCGAGAAGACGGTTCGGCTCCACGAAGTAGCCCAACCGTACCGGCACGCTTGCCACCGGCCTGCAGCTGGGCGCCCTCGGCCTGGGCGGACTCAATGTAGCCGAGAATCTTTTTGAACTGCTCCTCGTCCACCTGCGGTCCCTGCTGGACGCCGTCTTGAACGCATTGCCACCTTTCGCTGGCGGGCCATTTTCAGCCGCCTTCGCCACGAACGCATCGTAGATGCCCTCCTGCACGAACGTGCGGCTACCGGCGCAGCAGTTCTGTCCGTGGTTAGCGAAGATGGCATTGTGGGCAATTTCAACCGCTTCGTCCACTGAAACAACAATCAAACAAGAATGTTATTAGCGCCACTGCAATGCTTCGCAACGCTTCGGATTCCGCACCTTACGATCAGCATCGTTGAAGATCACCAGCGGGCTCTTGGCGCCAGCTCGAGCGAAACCTTCTTCAGGTTGGACGTGGACGCCCGCTCAGGATGATGCGGCCCGTCTCGACCGACCGGTGAACGCCACCTTCCGGATGTCCGGGTGGGCGACGATCGCGGCACCGACCGTCCGGCCGAAACCGTTACCACGTTGATCAGCCGTCCGGAAATCCGGCCTCCTTCGACAGCGCCGCCATGTGCAGTGCAGTGCAGCGGTGTCTGTTCCGGTTTCAGCACCAGCGTGCAGCCGGCCGCCAAGGNCGGCGCCACTTCCAGGTGAGCATCANGATCGGATAGTTCCAGGGATGATCTGCCCGACGACGCCGACCGGTTCTTGGCGATGTACGTGAGAACCGGTCCNNNNNNNNNGGNCNCCGTNA

>off3-4-300\_D04.ab1

NNNNNNNNNNNNNNNNNCGGCCGCCAGCCCGTACTCGGTGCTGTTGCGCCGCTCGATCACCTCGTCCAGCGTGCTGAACTTCAGGATGCTCTGCACCGGGCCAAAGATTTCTCGCGCGCAATCTTTCATGCCGTGCGGTACGTTTCGAGAAGACGGTTCGGCTCCACGAAGTAGCCACCGTACCGGCACGCTTGCCACCGGCCTGCAGCTGGGCGCCCTCGGCCTGGGCGGACTCAATGTAGCCGAGAATCTTTTTGAACTGCTCCTCGTCCACCTGCGGTCCCTGCTGGACGCCGTCTTGAACGCATTGCCACCTTTCGCTGGCGGGCCATTTTCAGCCGCCTTCGCCACGAACGCATCGTAGATGCCCTCCTGCACGAACGTGCGGCTACCGGCGCAGCAGTTCTGTCCGTGGTTAGCGAAGATGGCATTGTGGGCAATTTCAACCGCTTCGTCCACTGAAACAACAATCAAACAAGAATGTTATTAGCGCCACTGCAATGCTTCGCAACGCTTCGGATTCCGCACCTTACGATCAGCATCGTTGAAGATCACCAGCGGGCTCTTGGCGCCAGCTCGAGCGAAACCTTCTTCAGGTTGGACGTGGACGCCCGCTCAGGATGATGCGGCCCGTCTCGACCGACCGGTGAACGCCACCTTCCGGATGTCCGGGTGGGCGACGATCGCGGCACCGACCGTCCGGCCGAAACCGTTACCACGTTGATCAGCCGTCCGGAAATCCGGCCTCCTTCGACAGCGCCGCCATGTGCAGTGCAGTGCAGCGGTGTCTGTTCCGGTTTCAGCACCAGCGTGCAGCCGGCCGCCAAGGNCGGCGCCACTTCCNNTCAGCATCANNATCGGATAGTTCCAGGGATGATCTGCCCGACGACGCCGACCGGTTCTTGGCGATGTACGTGAGAACCGGTCCGTCCNNANNGGNCNCCGTANNN

>off3-5-300\_E04.ab1

NNNNNNNNNNNNNNANNNNCGGCCGCCAGCCCGTACTCGGTGCTGTTGCGCCGCTCGATCACCTCGTCCAGCGTGCTGAACTTCAGGATGCTCTGCACCGGGCCAAAGATTTCTCGCGCGCAATCTTTCATGCCGTGCGGTACGTTTCGAGAAGACGGTTCGGCTCCACGAAGTAGCCACCGTACCGGCACGCTTGCCACCGGCCTGCAGCTGGGCGCCCTCGGCCTGGGCGGACTCAATGTAGCCGAGAATCTTTTTGAACTGCTC

CTCGTCCACCTGCGGTCCCTGCTGGACGCCGTCTTGAACGCATTGCCACCTTGGCTGGCGGGCCATCTCAGCCGCCTTCGCCACGA  
ACGCATCGTAGATGCCCTCCTGCACGAACGTGCGGCTACCGGCGCAGCAGTTCTGTCCGTGGTTAGCGAAGATGGCATTGTGGCAATT  
TCAACCGCTTCGTCCACTGAAACAACAATCAAACAAGAATGTTATTAGCGCCCACTGCAATGCTTCGCAACGCTTCGGATTCCGCACTT  
ACGATCAGCATCGTTGAAGATCACCAGCGGGCTCTTGCCGCCAGCTCGAGCGAAACCTTCTTCAGGTTGGACGTGGACGCCCCGCTCA  
GGATGATGCGGCCCGTCTCGACCGACCCGGTGAACGCCACCTTCCGGATGTCCGGGTGGGCGACGATCGCGGCACCGACCGTTCGGCCCG  
AACCCGTTTACCACGTTGATCAGCGCGTCCGGAAATCCGGCCTCCTTCGACAGCGCCGCCATGTGCAGTGCCTCAGCGGTGTCTGTTT  
GGCCGGTTTACGACCAGCGTGCAGCCGGCCGCAAGGCCGGCGCCCACTTCCAGGTGAGCATCAGTATCGGATAGTTCCAGGGGATGA  
TCTGNCCGACGACGCCGANCGGTTCTTGGCGATGTACGTGAGAACCGGTCCGTCNNNNNNNNNNANCCGTNNN

>off3-6-300\_F04.ab1

NNNNNNNNNNNNNNNNNNCGGCCGCCAGCCCGTACTCGGTGCTGTTTCGCCCGCTCGATCACCTCGTCCAGCGTGTGAACCTCAGGAT  
GCTCTGCACCGGGCCAAAGATTTCTCGCGCGCAATCTTCATGCCGTCCGTCACGTTTCGAGAAGACGGTCCGCTCCACGAAGTAGCCCA  
CCGTACCGGCACGCTTGCCACCGGCCTGCAGCTGGGCGCCCTCGGTCTGGGCCGACTCGATGTAGCCGAGAATCTTTTTGAACTGCTCC  
TCGTCCACCTGCGGTCCCTGCTGGACGCCGTCTTGAACGCATCGCCACCTTGGCTGGCGGGCCATTTTCAGCCGCCTTCGCCACGAA  
CGCATCGTAGATGCCCTCCTGCACGAACGTGCGGCTACCGGCGCAGCAGTTCTGGCCGTGGTTAGCGAAGATGGCATTGTGGCAATTT  
CAACCGCTTCGTCCACTGAAACAACAATCAAACAAGAATGTTATTAGCGCCCACTGCAATGCTTCGCAACGCTTCGGATTCCGCACTTA  
CGATCAGCATCGTTGAAGATCACCAGCGGGCTCTTGCCGCCAGCTCGAGCGAAACCTTCTTCAGGTTGGACGTGGACGCCCCGCTCAG  
GATGATGCGGCCCGTCTCGACCGACCCGGTGAACGCCACCTTCCGGATGTCCGGGTGGGCGACGATCGCGGCACCGACCGTTCGGCCCGA  
ACCCGTTTACCACGTTGATCAGCGCGTCCGGAAATCCGGCCTCCTTCGACAGCGCCGCCATGTGCAGTGCCTCAGCGGTGTCTGTTTCG  
GCCGGTTTTCAGCACCAGCGTGCAGCCGGCCGCAAGGCCGGCGCCCACTTCCAGGTGAGCATCANNNTCGGATAGTTCCAGGGGATGATC  
TGCCCGACGACGCCGACCGGTTNCTTGGCGATGTACGTGAGAACCGGTCCGNCNAAANGNNACCNTNNNN

>off3-7-300\_G04.ab1

NNNNNNNNNNNNNNNNNNNGGCCGCCAGCCCGTACTCGGTGCTGTTTCGCCCGCTCGATCACCTCGTCCAGCGTGTGAACCTCAGGATG  
CTCTGCACCGGGCCAAAGATTTCTCGCGCGCAATCTTCATGCCGTCCGTCACGTTTCGAGAAGACGGTCCGCTCCACGAAGTAGCCAC  
CGTACCGGCACGCTTGCCACCGGCCTGCAGCTGGGCGCCCTCGGTCTGGGCCGACTCGATGTAGCCGAGAATCTTTTTGAACTGCTCCT  
CGTCCACCTGCGGTCCCTGCTGGACGCCGTCTTGAACGCATCGCCACCTTGGCTGGCGGGCCATTTTCAGCCGCCTTCGCCACGAA  
GCATCGTAGATGCCCTCCTGCACGAACGTGCGGCTACCGGCGCAGCAGTTCTGGCCGTGGTTAGCGAAGATGGCATTGTGGCAATTT  
AACCGCTTCGTCCACTGAAACAACAATCAAACAAGAATGTTATTAGCGCCCACTGCAATGCTTCGCAACGCTTCGGATTCCGCACTTAC  
GATCAGCATCGTTGAAGATCACCAGCGGGCTCTTGCCGCCAGCTCGAGCGAAACCTTCTTCAGGTTGGACGTGGACGCCCCGCTCAGG  
ATGATGCGGCCCGTCTCGACCGACCCGGTGAACGCCACCTTCCGGANGTTCGGGTGGGCGACGATCGCGGCACCGACCGTTCGGCCCGA  
ACCCGTTTACCACGTTGATCAGCGCGTCCGGAAATCCGGCCTCCTTCGACAGCGCCGCCATGTGCAGTGCCTCAGCGGTGTCTGTTTCG  
GCCGGTTTTCAGCACCAGCGTGCAGCCGGCCGCAAGGCCGGCGCCCACTTCCNNTCAGCATCNGGATCGGATAGTTCCNNGGGGATGATC  
TGCCCGACGACGCCGACCGGTTCTTGGCGATGTACGTGAGAACCGGTCCGTCGNNNACGGGCNNNNGNNNN

>off3-8-300\_H04.ab1

NNNNNNNNNNNNNNNNNNCGGCCGCCAGCCCGTACTCGGTGCTGTTTCGCCCGCTCGATCACCTCGTCCAGCGTGTGAACCTCAGGATG  
CTCTGCACCGGGCCAAAGATTTCTCGCGCGCAATCTTCATGCCGTCCGTCACGTTTCGAGAAGACGGTCCGCTCCACGAAGTAGCCAC  
CGTACCGGCACGCTTGCCACCGGCCTGCAGCTGGGCGCCCTCGGCCTGGGCCGACTCAATGTAGCCGAGAATCTTTTTGAACTGCTCCT  
CGTCCACCTGCGGTCCCTGCTGGACGCCGTCTTGAACGCATCGCCACCTTGGCTGGCGGGCCATTTTCAGCCGCCTTCGCCACGAA  
GCATCGTAGATGCCCTCCTGCACGAACGTGCGGCTACCGGCGCAGCAGTTCTGTCCGTGGTTAGCGAAGATGGCATTGTGGCAATTT  
AACCGCTTCGTCCACTGAAACAACAATCAAACAAGAATGTTATTAGCGCCCACTGCAATGCTTCGCAACGCTTCGGATTCCGCACTTAC  
GATCAGCATCGTTGAAGATCACCAGCGGGCTCTTGCCGCCAGCTCGAGCGAAACCTTCTTCAGGTTGGACGTGGACGCCCCGCTCAGG  
ATGATGCGGCCCGTCTCGACCGACCCGGTGAACGCCACCTTCCGGANGTTCGGGTGGGCGACGATCGCGGCACCGACCGTTCGGCCCGA  
ACCCGTTTACCACGTTGATCAGCGCGTCCGGAAATCCGGCCTCCTTCGACAGCGCCGCCATGTGCAGTGCCTCAGCGGTGTCTGTTTCG  
GCCGGTTTTCAGCACCAGCGTGCAGCCGGCCGCAAGGCCGGCGCCCACTTCCNNTCAGCATCANNATCGGATAGTTCCAGGGGATGATC  
TGCCCGACGACGCCGACCGGTTCTTGGCGATGTACGTGANAACCGGTCCGTCNNNNNNNGGCNACCNNNAAA

>off3-9-300\_A05.ab1

NNNNNNNNNNNNNNNNNNNGNANANNNGCCGCCAGCCCGTACTCGGTGCTGTTTCGCCCGCTCGATCACCTCGTCCAGCGTGTGAACCTCAGGAT  
GCTCTGCACCGGGCCAAAGATTTCTCGCGCGCAATCTTCATGCCGTCCGTCACGTTTCGAGAAGACGGTCCGCTCCACGAAGTAGCCCA  
CCGTACCGGCACGCTTGCCACCGGCCTGCAGCTGGGCGCCCTCGGCCTGGGCCGACTCAATGTAGCCGAGAATCTTTTTGAACTGCTCC  
TCGTCCACCTGCGGTCCCTGCTGGACGCCGTCTTGAACGCATTGCCACCTTGGCTGGCGGGCCATTTTCAGCCGCCTTCGCCACGAA  
CGCATCGTAGATGCCCTCCTGCACGAACGTGCGGCTACCGGCGCAGCAGTTCTGTCCGTGGTTAGCGAAGATGGCATTGTGGCAATTT  
CAACCGCTTCGTCCACTGAAACAACAATCAAACAAGAATGTTATTAGCGCCCACTGCAATGCTTCGCAACGCTTCGGATTCCGCACTTA  
CGATCAGCATCGTTGAAGATCACCAGCGGGCTCTTGCCGCCAGCTCGAGCGAAACCTTCTTCAGGTTGGACGTGGACGCCCCGCTCAG  
GATGATGCGGCCCGTCTCGACCGACCCGGTGAACGCCACCTTCCGGANGTTCGGGTGGGCGACGATCGCGGCACCGACCGTTCGGCCCGA  
ACCCGTTTACCACGTTGATCAGCGCGTCCGGAAATCCGGCCTCCTTCGACAGCGCCGCCATGTGCAGTGCCTCAGCGGTGTCTGTTTCG  
GCCGGTTTTCAGCACCAGCGTGCAGCCGGCCGCAAGGCCGGCGCCCACTTCCNNTCAGCATCANNATCGGATAGTTCCAGGGGATGATC

GCCGGTTTTAGCACCAGCGTGCAGCCGGCCGCAAGGCCGGCGCCCACTTCCNNTCAGCATCANGATCGGATAGTTCCNNGGGATGATC  
TGCCCGACGACGCCGACCGGTTCTTGCGGATGTACGTGAGAACCAGGTCGGTCCNNNANNNGNACCGTANNN

>off3-10-300\_B05.ab1

NNNNNNNNNNNNNNNNNNNGGCCGCCAGCCCGTACTCGGTGCTGTTTCGCCCGCTCGATCACCTCGTCCAGCGTGTGAACTTCAGGAT  
GCTCTGCACCGGGCCAAAGATTTCTCGCGCGCAATCTTCATGCCGTGGTACGTTTCGAGAAGACGGTCCGCTCCACGAAGTAGCCCA  
CCGTACCGGCACGCTTGCCACCGGCCTGCAGCTGGGCGCCCTCGGCCTGGGCCGACTCAATGTAGCCGAGAATCTTTTTGAACTGCTCC  
TCGTCCACCTGCGGTCCCTGCTGGACGCCGTCTGGAACGCATTGCCACCTTGCCTGGCGGGCCATTTAGCCGCTTCGCCACGAA  
CGCATCGTAGATGCCCTCCTGCACGAACGTGCGGCTACCGGCGCAGCAGTTCTGTCCGTGGTTAGCGAAGATGTCATTGTTGAACTGCTCC  
CAACCGCTTCGTCCACTGAAACAACAATCAAACAAGAATGTTATTAGCGCCCACTGCAATGCTTCGCAACGCTTCGGATTCCGCACTTA  
CGATCAGCATCGTTGAAGATCACCAGCGGGCTCTTGCCGCCAGCTCGAGCGAAACCTTCTTCAGGTTGGACGTGGACGCCCCGCTCAG  
GATGATGCGGCCCGTCTCGACCGACCCGGTGAACGCCACCTTCCNNNNNTCCGGGGTGGGCGACGATCGCGGCACCGACCGTCCGCCCCG  
AACCCGTTACCACGTTGATCAGCCGTCCGAAATCCGGCCTCCTTCGACAGCGCCGCCATGTGCAGTGCCTCAGCGGTGTCTGTTTC  
GGCCGGTTTTAGCACCAGCGTGCAGCCGGCCGCAAGGNCGGCGCCCACTTCCAGGTGAGCATCANNATCGGATAGTTCCAGGGGATGA  
TCTGCCCGACGACGCCGACCGGTTCTTGCGGATGTACGTGAGAACCAGGTCGGTCCGNCGNANCGGCNCCGTNNN

>off3-11-300\_C05.ab1

NNNNNNNNNNNNNNNNNCGGCCGCCAGCCCGTACTCGGTGCTGTTTCGCCCGCTCGATCACCTCGTCCAGCGTGTGAACTTCAGGATGC  
TCTGCACCGGGCCAAAGATTTCTCGCGCGCAATCTTCATGCCGTGGTACGTTTCGAGAAGACGGTCCGCTCCACGAAGTAGCCCA  
GTACCGGCACGCTTGCCACCGGCCTGCAGCTGGGCGCCCTCGGCCTGGGCCGACTCAATGTAGCCGAGAATCTTTTTGAACTGCTCCTC  
GTCCACCTGCGGTCCCTGCTGGACGCCGTCTGGAACGCATTGCCACCTTGCCTGGCGGGCCATCTCAGCCGCTTCGCCACGAACG  
CATCGTAGATGCCCTCCTGCACGAACGTGCGGCTACCGGCGCAGCAGTTCTGTCCGTGGTTAGCGAAGATGTCATTGTTGAACTGCTCC  
ACCGCTTCGTCCACTGAAACAACAATCAAACAAGAATGTTATTAGCGCCCACTGCAATGCTTCGCAACGCTTCGGATTCCGCACTTACG  
ATCAGCATCGTTGAAGATCACCAGCGGGCTCTTGCCGCCAGCTCGAGCGAAACCTTCTTCAGGTTGGACGTGGACGCCCCGCTCAGGA  
TGATGCGGCCCGTCTCGACCGACCCGGTGAACGCCACCTTCCGGATGTCCGGGTGGGCGACGATCGCGGCACCGACCGTCCGCCCCAAC  
CCGTTACCACGTTGATCAGCCGTCCGAAATCCGGCCTCCTTCGACAGCGCCGCCATGTGCAGTGCCTCAGCGGTGTCTGTTTCGGC  
CGGTTTTAGCACCAGCGTGCAGCCGGCCGCAAGGCCGGCGCCCACTTCCNNTCAGCATCAGTATCGGATAGTTCCAGGGGATGATCTG  
NCCGACGACGCCGACCGGTTCTTGCGGATGTACGTGAGAACCAGGTCGGTCCGNANNGGGCNCNCGTAN

>off3-12-300\_D05.ab1

GNNNNNNNNNNNNNNNNNCGNCGCCAGCCCGTACTCGGTGCTGTTTCGCCCGCTCGATCACCTCGTCCAGCGTGTGAACTTCAGGAT  
GCTCTGCACCGGGCCAAAGATTTCTCGCGCGCAATCTTCATGCCGTGGTACGTTTCGAGAAGACGGTCCGCTCCACGAAGTAGCCCA  
CCGTACCGGCACGCTTGCCACCGGCCTGCAGCTGGGCGCCCTCGGTCTGGGCCGACTCGATGTAGCCGAGAATCTTTTTGAACTGCTCC  
TCGTCCACCTGCGGTCCCTGCTGGACGCCGTCTGGAACGCATCGCCACCTTGCCTGGCGGGCCATTTAGCCGCTTCGCCACGAA  
CGCATCGTAGATGCCCTCCTGCACGAACGTGCGGCTACCGGCGCAGCAGTTCTGGCCGTGGTTAGCGAAGATGTCATTGTTGAACTGCTCC  
CAACCGCTTCGTCCACTGAAACAACAATCAAACAAGAATGTTATTAGCGCCCACTGCAATGCTTCGCAACGCTTCGGATTCCGCACTTA  
CGATCAGCATCGTTGAAGATCACCAGCGGGCTCTTGCCGCCAGCTCGAGCGAAACCTTCTTCAGGTTGGACGTGGACGCCCCGCTCAG  
GATGATGCGGCCCGTCTCGACCGACCCGGTGAACGCCACCTTCCGGANGTTCGGGGTGGGCGACGATCGCGGCACCGACCGTCCGCCCC  
GAACCCGTTACCACGTTGATCAGCCGTCCGAAATCCGGCCTCCTTCGACAGCGCCGCCATGTGCAGTGCCTCAGCGGTGTCTGTTTCGG  
CGGCCGGTTTTAGCACCAGCGTGCAGCCGGCCGCAAGGCCGGCGCCCACTTCCNNTCAGCATCAGTATCGGATAGTTCCAGGGGATGATCT  
TCTGCCCGACGACGCCGACCGGTTCTTGCGGATGTACGTGAGAACCAGGTCGGTCCGNCGANNNNNGGGCCNCCGTNNN

>off3-13-300\_E05.ab1

NNNNNNNNNNNNNNNNNCGGCCGCCAGCCCGTACTCGGTGCTGTTTCGCCCGCTCGATCACCTCGTCCAGCGTGTGAACTTCAGGATGC  
TCTGCACCGGGCCAAAGATTTCTCGCGCGCAATCTTCATGCCGTGGTACGTTTCGAGAAGACGGTCCGCTCCACGAAGTAGCCCA  
GTACCGGCACGCTTGCCACCGGCCTGCAGCTGGGCGCCCTCGGCCTGGGCCGACTCAATGTAGCCGAGAATCTTTTTGAACTGCTCCTC  
GTCCACCTGCGGTCCCTGCTGGACGCCGTCTGGAACGCATTGCCACCTTGCCTGGCGGGCCATCTCAGCCGCTTCGCCACGAACG  
CATCGTAGATGCCCTCCTGCACGAACGTGCGGCTACCGGCGCAGCAGTTCTGTCCGTGGTTAGCGAAGATGTCATTGTTGAACTGCTCC  
ACCGCTTCGTCCACTGAAACAACAATCAAACAAGAATGTTATTAGCGCCCACTGCAATGCTTCGCAACGCTTCGGATTCCGCACTTACG  
ATCAGCATCGTTGAAGATCACCAGCGGGCTCTTGCCGCCAGCTCGAGCGAAACCTTCTTCAGGTTGGACGTGGACGCCCCGCTCAGGA  
TGATGCGGCCCGTCTCGACCGACCCGGTGAACGCCACCTTCCGGANGTTCGGGGTGGGCGACGATCGCGGCACCGACCGTCCGCCCCGAA  
CCCGTTACCACGTTGATCAGCCGTCCGAAATCCGGCCTCCTTCGACAGCGCCGCCATGTGCAGTGCCTCAGCGGTGTCTGTTTCGG  
CCGGTTTTAGCACCAGCGTGCAGCCGGCCGCAAGGCCGGCGCCCACTTCCNNTCAGCATCAGTATCGGATAGTTCCAGGGGATGATCT  
GCCCGACGACGCCGACCGGTTCTTGCGGATGTACGTGAGAACCAGGTCGGTCCGNCGANNNNNGGGCCNCCGTNNN

>off3-14-300\_F05.ab1

NNNNNNNNNNNNNNNNNNNNANNNCGGCCGCGCCAGCCCGTACTCGGTGCTGTTTCGCCCCGCTCGATCACCTCGTCCAGCGTGCTGAACTTCAGGATG  
CTCTGCACCGGGCCAAAGATTTCTCGCGCGCAATCTTTCATGCCGTTCGGTACGTTTCGAGAAGACGGTTCGGCTCCACGAAGTAGCCAC  
CGTACCGGCACGCTTGCCACCGGCCTGCAGCTGGGCGCCCTCGGTCTGGGCCGACTCGATGTAGCCGAGAATCTTTTTGAACTGCTCCT  
CGTCCACCTGCGGTCCCTGCTGGACGCCGTCTTGAACGCATCGCCACCTTTCGCTGGCGGGCCATTTTCAGCCGCCTTCGCCACGAAC  
GCATCGTAGATGCCCTCCTGCACGAACGTGCGGCTACCGGCGCAGCAGTTCTGGCCGTGGTTAGCGAAGATGGCATTGTGGGCAATTTT  
AACCGCTTCGTCCACTGAAACAACAATCAAACAAGAATGTTATTAGCGCCACTGCAATGCTTCGCAACGCTTCGGATTCCGCACCTTAC  
GATCAGCATCGTTGAAGATCACCAGCGGGCTCTTGGCGCCAGCTCGAGCGAAACCTTCTTCAGGTTGGACGTGGACGCCCGGCTCAGG  
ATGATGCGGCCCGTCTCGACCGACCCGGTGAACGCCACCTTCCGGANGTTCGGGTGGGCGACGATCGCGGCACCGACCGTTCGGCCCGA  
ACCCGTTTACCACGTTGATCAGCCGTCCGGAAATCCGGCCTCCTTCGACAGCGCCGCCATGTGCAGTGCCTCAGCGGTGTCTGTTTCG  
GCCGGTTTTCAGCACCAGCGTGCAGCCGGCCGCCAAGGCCGGCGCCACTTCCAGGTTCAGCATCANNATCGGATAGTTCCNGGGATGATCT  
GCCCGACGACGCCGACCGGTTCTTTCGCGGATGTACGTCANAACCGGTCCGTCGANANNGGCACCGTNNN

>off3-15-300\_G05.ab1

NNNNNNNNNNNNNNNNNNNNANNNNGGCCGCGCCAGCCCGTACTCGNGTGCTGTTTCGCCCCGCTCGATCACCTCGTCCAGCGTGCTGAACTTCAGGA  
TGCTCTGCACCGGGCCAAAGATTTCTCGCGCGCAATCTTTCATGCCGTTCGGTACGTTTCGAGAAGACGGTTCGGCTCCACGAAGTAGCC  
ACCGTACCGGCACGCTTGCCACCGGCCTGCAGCTGGGCGCCCTCGGCCTGGGCCGACTCAATGTAGCCGAGAATCTTTTTGAACTGCTC  
CTCGTCCACCTGCGGTCCCTGCTGGACGCCGTCTTGAACGCATTGCCACCTTTCGCTGGCGGGCCATTTTCAGCCGCCTTCGCCACGA  
ACGCATCGTAGATGCCCTCCTGCACGAACGTGCGGCTACCGGCGCAGCAGTTCTGTCCGTGGTTAGCGAAGATGGCATTGTGGGCAATT  
TCAACCGCTTCGTCCACTGAAACAACAATCAAACAAGAATGTTATTAGCGCCACTGCAATGCTTCGCAACGCTTCGGATTCCGCACCTT  
ACGATCAGCATCGTTGAAGATCACCAGCGGGCTCTTGGCGCCAGCTCGAGCGAAACCTTCTTCAGGTTGGACGTGGACGCCCGGCTCA  
GGATGATGCGGCCCGTCTCGACCGACCCGGTGAACGCCACCTTCCGGANGTTCGGGTGGGCGACGATCGCGGCACCGACCGTTCGGCCCG  
AACCCGTTTACCACGTTGATCAGCCGTCCGGAAATCCGGCCTCCTTCGACAGCGCCGCCATGTGCAGTGCCTCAGCGGTGTCTGTTTC  
GGCCGGTTTTCAGCACCAGCGTGCAGCCGGCCGCCAAGGCCGGCGCCACTTCCAGGTTCAGCATCANGNATCGGATAGTTCCAGGGATGA  
TCTGCCCGACGACGCCGACCGGTTCTTTCGCGGATGTACGTCAGAACCGGTCCGTCGNNNGGCACNNNTAA

>off3-16-300\_H05.ab1

NNNNNNNNNNNNNNNNNNNNANNNNCGGCCGCGCCAGCCCGTACTCGGTGCTGTTTCGCCCCGCTCGATCACCTCGTCCAGCGTGCTGAACTTCAG  
GATGCTCTGCACCGGGCCAAAGATTTCTCGCGCGCAATCTTTCATGCCGTTCGGTACGTTTCGAGAAGACGGTTCGGCTCCACGAAGTAGC  
CCACCGTACCGGCACGCTTGCCACCGGCCTGCAGCTGGGCGCCCTCGGCCTGGGCCGACTCAATGTAGCCGAGAATCTTTTTGAACTGC  
TCCTCGTCCACCTGCGGTCCCTGCTGGACGCCGTCTTGAACGCATTGCCACCTTTCGCTGGCGGGCCATCTCAGCCGCCTTCGCCAC  
GAACGCATCGTAGATGCCCTCCTGCACGAACGTGCGGCTACCGGCGCAGCAGTTCTGTCCGTGGTTAGCGAAGATGGCATTGTGGGCAA  
TTTTAACCGCTTCGTCCACTGAAACAACAATCAAACAAGAATGTTATTAGCGCCACTGCAATGCTTCGCAACGCTTCGGATTCCGCAC  
TTACGATCAGCATCGTTGAAGATCACCAGCGGGCTCTTGGCGCCAGCTCGAGCGAAACCTTCTTCAGGTTGGACGTGGACGCCCGGCT  
CAGGATGATGCGGCCCGTCTCGACCGACCCGGTGAACGCCACCTTCCGGATGTCCGGGTGGGCGACGATCGCGGCACCGACCGTTCGGCC  
CGAACCCGTTTACCACGTTGATCAGCCGTCCGGAAATCCGGCCTCCTTCGACAGCGCCGCCATGTGCAGTGCCTCAGCGGTGTCTGT  
TCGGCCGGTTTTCAGCACCAGCGTGCAGCCGGCCGCCAAGGCCGGCGCCACTTCCAGGTTCAGCATCAGTATCGGATAGTTNCAGGGGAN  
GATCTGCCCGACGACGCCGACCGGTTCTTTCGCGGATGTACGTCANAACCGGTCCGTCGNNANGGNNCCGTNNN

>off3-17-300\_A06.ab1

NNNNNNNNNNNNNNNNNNNNANNNNGGCCGCGCCAGCCCGTACTCGGTGCTGTTTCGCCCCGCTCGATCACCTCGTCCAGCGTGCTGAACTTCAG  
ATGCTCTGCACCGGGCCAAAGATTTCTCGCGCGCAATCTTTCATGCCGTTCGGTACGTTTCGAGAAGACGGTTCGGCTCCACGAAGTAGCC  
CACCGTACCGGCACGCTTGCCACCGGCCTGCAGCTGGGCGCCCTCGGCCTGGGCCGACTCAATGTAGCCGAGAATCTTTTTGAACTGCT  
CCTCGTCCACCTGCGGTCCCTGCTGGACGCCGTCTTGAACGCATTGCCACCTTTCGCTGGCGGGCCATCTCAGCCGCCTTCGCCACG  
AACGCATCGTAGATGCCCTCCTGCACGAACGTGCGGCTACCGGCGCAGCAGTTCTGTCCGTGGTTAGCGAAGATGGCATTGTGGGCAATT  
TCAACCGCTTCGTCCACTGAAACAACAATCAAACAAGAATGTTATTAGCGCCACTGCAATGCTTCGCAACGCTTCGGATTCCGCACCTT  
ACGATCAGCATCGTTGAAGATCACCAGCGGGCTCTTGGCGCCAGCTCGAGCGAAACCTTCTTCAGGTTGGACGTGGACGCCCGGCTCA  
GGATGATGCGGCCCGTCTCGACCGACCCGGTGAACGCCACCTTCCGGANGTTCGGGTGGGCGACGATCGCGGCACCGACCGTTCGGCC  
GAACCCGTTTACCACGTTGATCAGCCGTCCGGAAATCCGGCCTCCTTCGACAGCGCCGCCATGTGCAGTGCCTCAGCGGTGTCTGTT  
CGGCCGGTTTTCAGCACCAGCGTGCAGCCGGCCGCCAAGGCCGGCGCCACTTCCAGGTTCAGCATCAGTATCGGATAGTTCCAGGGGAN  
ATCTGCCCGACGACGCCGACCGGTTCTTTCGCGGATGTACGTCANANCGGTCCGTCGAAANGGNNACCGNNNNN

>off3-18-300\_B06.ab1

NNNNNNNNNNNNNNNNNNNNANNNNCGGCCGCGCCAGCCCGTACTCGGTGCTGTTTCGCCCCGCTCGATCACCTCGTCCAGCGTGCTGAACTTCAGGA  
TGCTCTGCACCGGGCCAAAGATTTCTCGCGCGCAATCTTTCATGCCGTTCGGTACGTTTCGAGAAGACGGTTCGGCTCCACGAAGTAGCC  
ACCGTACCGGCACGCTTGCCACCGGCCTGCAGCTGGGCGCCCTCGGCCTGGGCCGACTCAATGTAGCCGAGAATCTTTTTGAACTGCTC

CTCGTCCACCTGCGGTCCCTGCTGGACGCCGTCTGGAACGCATTGCCACCTTGCCTGGCGGGCCATCTCAGCCGCCTTCGCCACGA  
ACGCATCGTAGATGCCCTCTGCACGAACGTGCGGCTACCGGCGCAGCAGTTCTGTCCGTGGTTAGCGAAGATGGCATTGTGGGCAATT  
TCAACCGCTTCGTCCACTGAAACAACAATCAAACAAGAATGTTATTAGCGCCACTGCAATGCTTCGCAACGCTTCGGATTCCGCACTT  
ACGATCAGCATCGTTGAAGATCACCAGCGGGCTCTTGCCGCCAGCTCGAGCGAAACCTTCTTCAGGTTGGACGTGGACGCCCCGCTCA  
GGATGATGCGGCCCGTCTCGACCGACCCGGTGAACGCCACCTTCCGGATGTCCGGGTGGGCGACGATCGCGGCACCGACCGTTCGGCCCG  
AACCCGTTACCACGTTGATCACGCCGTCCGGAAATCCGGCCTCCTTCGACAGCGCCGCCATGTGCAGTGCCTCAGCGGTGTCTGTTT  
GGCCGGTTTACGACCAGCGTGCAGCCGGCCGCCNAAGGCCGGCGCCACTTCCNNTCAGCATCAGTATCGGATAGTTCCNNGGGGATGA  
TCTGCCCGACGACGCCGACCGGTTCTTGCGGATGTACGTGAGAACCGGTCCGTTCGANNNGGNNANCCGNNNNA

>off3-19-300\_C06.ab1

NNNNNNNNNNNNNNNNNNNGGCCGCCAGCCCGTACTCGGTGCTGTTTCGCCCGCTCGATCACCTCGTCCAGCGTGCTGAACTTCAGGATG  
CTCTGCACCGGGCCAAAGATTTCTCGCGCGCAATCTTCATGCCGTTCGGTTCAGTTTCGAGAAGACGGTTCGGCTCCACGAAGTAGCCAC  
CGTACCGGCACGCTTGCCACCGGCCTGCAGCTGGGCGCCCTCGGCCTGGGCGGACTCAATGTAGCCGAGAATCTTTTTGAACTGCTCCT  
CGTCCACCTGCGGTCCCTGCTGGACGCCGTCTGGAACGCATTGCCACCTTGCCTGGCGGGCCATTTTCAGCCGCCTTCGCCACGAAC  
GCATCGTAGATGCCCTCTGCACGAACGTGCGGCTACCGGCGCAGCAGTTCTGTCCGTGGTTAGCGAAGATGGCATTGTGGGCAATTTT  
AACCGCTTCGTCCACTGAAACAACAATCAAACAAGAATGTTATTAGCGCCACTGCAATGCTTCGCAACGCTTCGGATTCCGCACTTAC  
GATCAGCATCGTTGAAGATCACCAGCGGGCTCTTGCCGCCAGCTCGAGCGAAACCTTCTTCAGGTTGGACGTGGACGCCCCGCTCAGG  
ATGATGCGGCCCGTCTCGACCGACCCGGTGAACGCCACCTTCCGGATGTCCGGGTGGGCGACGATCGCGGCACCGACCGTTCGGCCCGAA  
CCCGTTACCACGTTGATCACGCCGTCCGGAAATCCGGCCTCCTTCGACAGCGCCGCCATGTGCAGTGCCTCAGCGGTGTCTGTTTCGG  
CCGGTTTACGACCAGCGTGCAGCCGGCCGCCAAGGCCGGCGCCACTTCCANGTCAGCATCANNATCGGATAGTTCCAGGGGATGATC  
TGCCCGACGAACGCCGANCGGTTCCNTNGCGGATGTACGTGANAACCGGTCCGTTCGNNNGGCGNNCCGTAAAAAN

>off3-20-300\_D06.ab1

NNNNNNNNNNNNNNNNNNNGGCCGCCAGCCCGTACTCGGTGCTGTTTCGCCCGCTCGATCACCTCGTCCAGCGTGCTGAACTTCAGGAT  
GCTCTGCACCGGGCCAAAGATTTCTCGCGCGCAATCTTCATGCCGTTCGGTTCAGTTTCGAGAAGACGGTTCGGCTCCACGAAGTAGCCCA  
CCGTACCGGCACGCTTGCCACCGGCCTGCAGCTGGGCGCCCTCGGCCTGGGCGGACTCAATGTAGCCGAGAATCTTTTTGAACTGCTCC  
TCGTCCACCTGCGGTCCCTGCTGGACGCCGTCTGGAACGCATTGCCACCTTGCCTGGCGGGCCATTTTCAGCCGCCTTCGCCACGAA  
CGCATCGTAGATGCCCTCTGCACGAACGTGCGGCTACCGGCGCAGCAGTTCTGTCCGTGGTTAGCGAAGATGGCATTGTGGGCAATTT  
CAACCGCTTCGTCCACTGAAACAACAATCAAACAAGAATGTTATTAGCGCCACTGCAATGCTTCGCAACGCTTCGGATTCCGCACTTA  
CGATCAGCATCGTTGAAGATCACCAGCGGGCTCTTGCCGCCAGCTCGAGCGAAACCTTCTTCAGGTTGGACGTGGACGCCCCGCTCAG  
GATGATGCGGCCCGTCTCGACCGACCCGGTGAACGCCACCTTCCGGATGTCCGGGTGGGCGACGATCGCGGCACCGACCGTTCGGCCCGA  
ACCCGTTACCACGTTGATCACGCCGTCCGGAAATCCGGCCTCCTTCGACAGCGCCGCCATGTGCAGTGCCTCAGCGGTGTCTGTTTCG  
GCCGGTTTANCACCAGCGTGCAGCCGGCCGCCAAGGCCGGCGCCACTTCCAGGTCNGCATCANNATCGGATAGTTCCAGGGGATGAT  
CTGCCCGACGACGCCGACCGGTTCTTGCGGATGTACGTGAGAACCGGTCCGTTCGANCGNNNACCCTAANN

>off3-21-300\_E06.ab1

NNNNNNNNNNNNNNNNNNNGGCCGCCAGCCCGTACTCGGTGCTGTTTCGCCCGCTCGATCACCTCGTCCAGCGTGCTGAACTTCAGGA  
TGCTCTGCACCGGGCCAAAGATTTCTCGCGCGCAATCTTCATGCCGTTCGGTTCAGTTTCGAGAAGACGGTTCGGCTCCACGAAGTAGCC  
ACCGTACCGGCACGCTTGCCACCGGCCTGCAGCTGGGCGCCCTCGGCCTGGGCGGACTCAATGTAGCCGAGAATCTTTTTGAACTGCTC  
CTCGTCCACCTGCGGTCCCTGCTGGACGCCGTCTGGAACGCATTGCCACCTTGCCTGGCGGGCCATTTTCAGCCGCCTTCGCCACGA  
ACGCATCGTAGATGCCCTCTGCACGAACGTGCGGCTACCGGCGCAGCAGTTCTGTCCGTGGTTAGCGAAGATGGCATTGTGGGCAATTT  
TCAACCGCTTCGTCCACTGAAACAACAATCAAACAAGAATGTTATTAGCGCCACTGCAATGCTTCGCAACGCTTCGGATTCCGCACTT  
ACGATCAGCATCGTTGAAGATCACCAGCGGGCTCTTGCCGCCAGCTCGAGCGAAACCTTCTTCAGGTTGGACGTGGACGCCCCGCTCA  
GGATGATGCGGCCCGTCTCGACCGACCCGGTGAACGCCACCTTCCGGATGTCCGGGTGGGCGACGATCGCGGCACCGACCGTTCGGCCCG  
AACCCGTTACCACGTTGATCACGCCGTCCGGAAATCCGGCCTCCTTCGACAGCGCCGCCATGTGCAGTGCCTCAGCGGTGTCTGTTT  
GGCCGGTTTACGACCAGCGTGCAGCCGGCCGCCAAGGCCGGCGCCACTTCCAGGTCAGCATCANGATCGGATAGTTCCAGGGGATGA  
TCTGCCCGACGACGCCGACCGGNTTCTTGCGGATGTACGTGAGANCGGTCCGNCGNNNNNGNACCCGNANN

>off3-22-300\_F06.ab1

NNNNNNNNNNNNNNNNNNNCGGCCGCCAGCCCGTACTCGGTGCTGTTTCGCCCGCTCGATCACCTCGTCCAGCGTGCTGAACTTCAGGA  
TGCTCTGCACCGGGCCAAAGATTTCTCGCGCGCAATCTTCATGCCGTTCGGTTCAGTTTCGAGAAGACGGTTCGGCTCCACGAAGTAGCC  
ACCGTACCGGCACGCTTGCCACCGGCCTGCAGCTGGGCGCCCTCGGTCTGGGCGGACTCGATGTAGCCGAGAATCTTTTTGAACTGCTC  
CTCGTCCACCTGCGGTCCCTGCTGGACGCCGTCTGGAACGCATCGCCACCTTGCCTGGCGGGCCATTTTCAGCCGCCTTCGCCACGA  
ACGCATCGTAGATGCCCTCTGCACGAACGTGCGGCTACCGGCGCAGCAGTTCTGGCCGTGGTTAGCGAAGATGGCATTGTGGGCAATTT  
TCAACCGCTTCGTCCACTGAAACAACAATCAAACAAGAATGTTATTAGCGCCACTGCAATGCTTCGCAACGCTTCGGATTCCGCACTT  
ACGATCAGCATCGTTGAAGATCACCAGCGGGCTCTTGCCGCCAGCTCGAGCGAAACCTTCTTCAGGTTGGACGTGGACGCCCCGCTCA  
GGATGATGCGGCCCGTCTCGACCGACCCGGTGAACGCCACCTTCCGGATGTCCGGGTGGGCGACGATCGCGGCACCGACCGTTCGGCCCG  
AACCCGTTACCACGTTGATCACGCCGTCCGGAAATCCGGCCTCCTTCGACAGCGCCGCCATGTGCAGTGCCTCAGCGGTGTCTGTTT  
GGCCGGTTTACGACCAGCGTGCAGCCGGCCGCCAAGGCCGGCGCCACTTCCAGGTCAGCATCANGATCGGATAGTTCCAGGGGATGA  
TCTGCCCGACGACGCCGACCGGNTTCTTGCGGATGTACGTGAGANCGGTCCGNCGNNNNNGNACCCGNANN

ACGATCAGCATCGTTGAAGATCACCAGCGGGCTCTTGCCGCCAGCTCGAGCGAAACCTTCTTCAGGTTGGACGTGGACGCCCCCGCTCA  
GGATGATGCGGCCCGTCTCGACCGACCCGGTGAACGCCACCTTCCGGATGTCCGGGTGGG

>off3-23-300\_G06.ab1

NNNNNNNNNNNNNNNNNNNNNNNNNGNGCCAGCCCGTACTCGGTGCTGTTGCCCCGCTCGATCACCTCGTCCAGCGTGCTGAACTTCAG  
GATGCTCTGCACCGGGCCAAAGATTTCTCGCGCGCAATCTTCATGCCGTGCGTACGTTTCGAGAAGACGGTCCGCTCCACGAAGTAGC  
CCACCGTACCGGCACGCTTGCCACCGGCCTGCAGCTGGGCGCCCTCGGCTGGGCCGACTCAATGTAGCCGAGAATCTTTTTGAACTGC  
TCCTCGTCCACCTGCGGTCCCTGCTGGACGCCGTCTGGAACGCATTGCCACCTTGCCTGGCGGGCCATTTAGCCGCCTTCGCCAC  
GAACGCATCGTAGATGCCCTCCTGCACGAACGTGCGGCTACCGGCGCAGCAGTTCTGTCCGTGGTTAGCGAAGATGGCATTGTGGCAA  
TTTTAACCGCTTCGTCCACTGAAACAACAATCAAACAAGAATGTTATTAGCGCCCACTGCAATGCTTCGCAACGCTTCGGATTCCGCAC  
TTACGATCAGCATCGTTGAAGATCACCAGCGGGCTCTTGCCGCCAGCTCGAGCGAAACCTTCTTCAGGTTGGACGTGGACGCCCCCGCT  
CANGATGATGCGGCCCGTCTCGACCGACCCGGTGAACGCCNNNTNCGGATGTCCNGGNGN

>off3-24-300\_H06.ab1

NNNNNNNNNNNNNNNNNNANNCGGCCGCCAGCCCGTACTCGGTGCTGTTGCCCCGCTCGATCACCTCGTCCAGCGTGCTGAACTTCAGGAT  
GCTCTGCACCGGGCCAAAGATTTCTCGCGCGCAATCTTCATGCCGTGCGTACGTTTCGAGAAGACGGTCCGCTCCACGAAGTAGCCCA  
CCGTACCGGCACGCTTGCCACCGGCCTGCAGCTGGGCGCCCTCGGTCTGGGCCGACTCGATGTAGCCGAGAATCTTTTTGAACTGCTCC  
TCGTCCACCTGCGGTCCCTGCTGGACGCCGTCTGGAACGCATCGCCACCTTGCCTGGCGGGCCATTTAGCCGCCTTCGCCACGAA  
CGCATCGTAGATGCCCTCCTGCACGAACGTGCGGCTACCGGCGCAGCAGTTCTGGCCGTGGTTAGCGAAGATGGCATTGTGGCAAATTT  
CAACCGCTTCGTCCACTGAAACAACAATCAAACAAGAATGTTATTAGCGCCCACTGCAATGCTTCGCAACGCTTCGGATTCCGCACTTA  
CGATCAGCATCGTTGAAGATCACCAGCGGGCTCTTGCCGCCAGCTCGAGCGAAACCTTCTTCAGGTTGGACGTGGACGCCCCCGCTCAG  
GATGATGCGGCCCGTCTCGACCGACCCGGTGAACGCCACCTTCCGGANGTCCGGGGTGGGCGACGATCGCGGCACCGACCGTCCGCCCCG  
AACCCGTTACCACGTTGATCAGCCGTCCGAAATCCGGCCTCCTTCGACAGCGCCGCCATGTGCAGTGCCTCAGCGGTGTCTGTTT  
GGCCGGTTTTCAGCACCGCGTGCAGCCGGCCGCAAGGCCGGCGCCCACTTCCAGGTGATCAGGATCGGATAGTTCCAGGGGATGA  
TCTGCCCGACGACGCCGACCGGTTCTTGCGGATGTACGTANAACCGGTCCNNNNNNNNNNNGGNNNNNGNNN

>off3-25-300\_A07.ab1

NNNNNNNNNNNNNNNNNNNNNNNNCGGNCGCCAGCCCGTACTCGGTGCTGTTGCCCCGCTCGATCACCTCGTCCAGCGTGCTGAACTTC  
AGGATGCTCTGCACCGGGCCAAAGATTTCTCGCGCGCAATCTTCATGCCGTGCGTACGTTTCGAGAAGACGGTCCGCTCCACGAAGTA  
GCCCACCGTACCGGCACGCTTGCCACCGGCCTGCAGCTGGGCGCCCTCGGTCTGGGCCGACTCGATGTAGCCGAGAATCTTTTTGAACT  
GCTCCTCGTCCACCTGCGGTCCCTGCTGGACGCCGTCTGGAACGCATCGCCACCTTGCCTGGCGGGCCATTTAGCCGCCTTCGCC  
ACGAACGCATCGTAGATGCCCTCCTGCACGAACGTGCGGCTACCGGCGCAGCAGTTCTGGCCGTGGTTAGCGAAGATGGCATTGTGGGC  
AATTTAACCGCTTCGTCCACTGAAACAACAATCAAACAAGAATGTTATTAGCGCCCACTGCAATGCTTCGCAACGCTTCGGATTCCGC  
ACTTACGATCAGCATCGTTGAAGATCACCAGCGGGCTCTTGCCGCCAGCTCGAGCGAAACCTTCTTCAGGTTGGACGTGGACGCCCCCG  
CTCAGGATGATGCGGCCCGTCTCGACCGACCCGGTGAACGCCACCTTCCGGATGTCCGGGTGGGCGACGATCGCGGCACCGACCGTCCG  
CCCGAACCCGTTACCACGTTGATCAGCCGTCCGAAATCCGGCCTCCTTCGACAGCGCCGCCATGTGCAGTGCCTCAGCGGTGTCT  
GTTCCGGCCGGTTTTCAGCACCGCGTGCAGCCGGCCGCAAGGCCGGCGCCCACTTCCAGGTGATCAGGATCGGATAGTTCCAGGGG  
ANGATCTGCCCGACGACGCCGACCGGTTCTTGCGGNTGTACGTANAACCGGTCCGTCNNNACGGCNCNNNNAN

**Figure S8. Indel length and number of off-target 1 NGS deep sequencing reads.** A) WT, B) G<sub>9</sub> females, C) G<sub>9</sub> males, D) G<sub>10</sub> females and E) G<sub>10</sub> males. Blue bars represent deletions in the off-target 1 sequence found in the reads, while the orange bars represent reads that have the intact WT off-target 1 sequence. The numbers above the bars on the X axis are the total sequences recovered of each type. Small numbers cannot be seen because of the large scale of the Y axis.

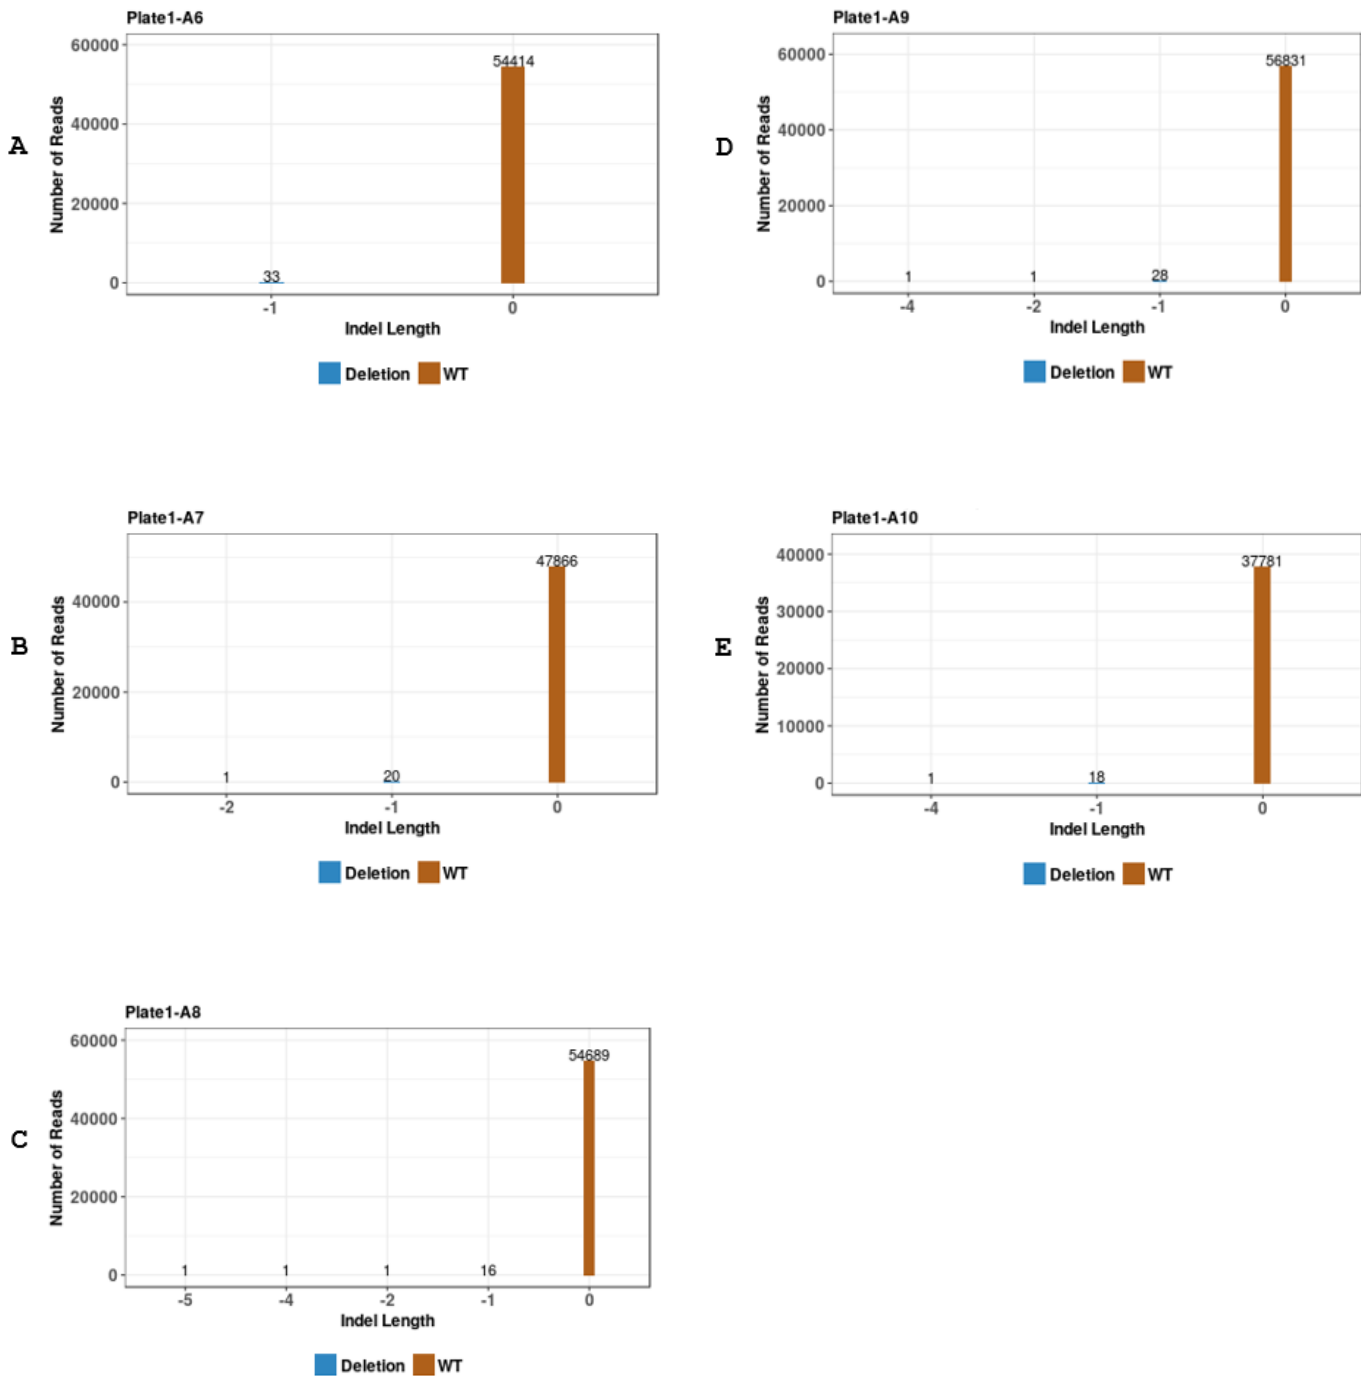

**Figure S9. off-target 1 deletions detected by NGS near predicted AgNosCd-1 and WT cut-sites.** Wild-type (WT), Generation 9 and 10 female and male samples were analyzed. Sequences are listed 5'-3' with the PAM (not shown) to the right. Dashes denote deletions compared to the wild-type reference target sequence. Vertical lines show identical nucleotides and an open space highlights polymorphisms. Asterisks are deletions found only in AgNosCd1 and not wild-type mosquitoes. The blue arrows are predicted cut sites.

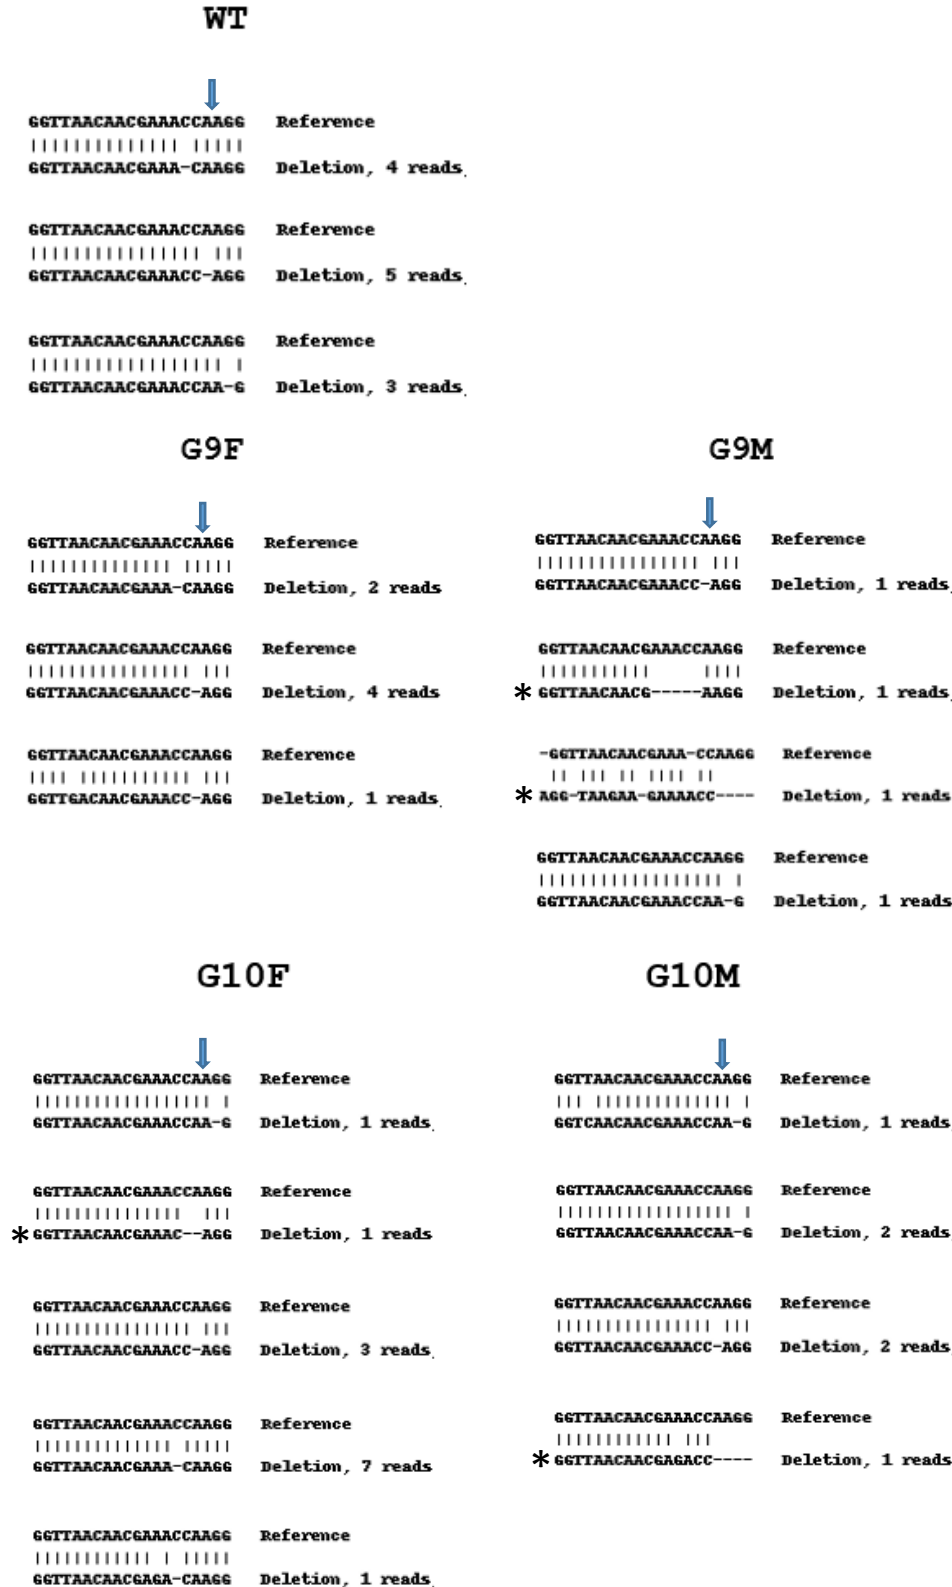



## SUPPORTING TEXT.

### Analysis of tear phenotypes.

A pooled Next Generation Sequencing (NGS) analysis of *Agcd* amplicons from 20 tear mosquitoes supports the hypothesis that the distinctive phenotype results from mosaics of cells with indel and WT alleles. A total of 43.45% (47,755/109,903 reads) of the alleles show indels, 41.86% (46,005) of which are at and adjacent to the gRNA cut site (Table S4, Figure S4). The sizes of the lesions varied from deletions of 19 nucleotides to insertions of 17. A WT control sample comprising 15 mosquitoes had three deletions (0.0027%; 3/112,443) of 5-8 nucleotides near the cut site. Additional evidence in support of mosaicism comes from a ddPCR analysis of individual and pooled tear mosquitoes (Table S5). Individual mosquitoes revealed a wide range, 2.21% to 47.5%, of indels in the total loci examined with an average of 19.99%. All three alternate allele configurations, transgene-insertion, indel, and WT, can be present in mosaic individuals. Individual WT controls were on average ~80-fold lower. Five pooled tear mosquitoes had an average of 22.6% indels in all loci analyzed with pooled WT controls being ~104-fold lower.

To determine if indel alleles were present in the germline of tear mosquitoes, four intercrosses (IX) were performed with tear phenotype mosquitoes recovered from the cage experiments described below (IX-1, G<sub>3</sub> [11 males, 31 females]; IX-3, G<sub>4</sub> [18 males, 29 females] and IX-4, G<sub>5</sub> [11 males, 38 females]) in addition to IX-2 (14 males and 16 females) of the maternal-effect experiments (Table S6). Total pupae in all four intercrosses were >99% (1590/1591) CFP<sup>+</sup> and ~95% (1509/1591) of these had the mutant *cd* red-eye phenotype. Eighty-one (~5.1%) of the total progeny were hemizygous CFP<sup>+</sup> with WT eye-color. These could have a WT copy of the *cd* locus (no gene-drive insertion), an indel that creates a frameshift capable of encoding a functional enzyme, or a drive-resistant single nucleotide polymorphism (SNP) that also encodes a functional product. A single individual (1/1591, 0.06%) was CFP<sup>-</sup> with WT eye-color.

A sample of 60 of the 81 CFP<sup>+</sup>/WT presumed hemizygous mosquitoes were selected for sequencing around the target site, and of these, 56 produced DNA of sufficient quality to provide a result. Thirteen had functional indel alleles (capable of conferring a WT phenotype in a hemizygote) and the remaining were either WT (42 samples) or had a functional allele with three SNPs that was recovered 13 times (Table S6). Twelve of the functional indels had the same in-frame six nucleotide deletion sequence near the gRNA cut site and one had a six nucleotide deletion shifted two additional base pairs towards the 5'-end of the cut site.

Fifty CFP<sup>+</sup>/*cd* individuals each from the four crosses were analyzed with ddPCR, and only one (1/200; 0.5%) non-functional indel allele was detected (Table S6). This allele has a mixed insertion/deletion sequence resulting most likely from NHEJ. We calculated the percentage of NHEJ indel alleles arising in the tear intercrosses as follows: 5.09% (81/1591) hemizygous progeny multiplied by 23.2% indels (13 /56 analyzed in hemizygous progeny) to give 1.18%. We add to this the percentage, 0.5%, found in the ddPCR experiments, for a total of 1.68%. This total is below the frequency of the indel alleles seen in the NGS and ddPCR analyses of tear phenotype mosquitoes (Figure S4 and Tables S4 and S5), indicating that the indels are predominantly restricted to the somatic cells.

## REFERENCES

1. VectorBase. <https://www.vectorbase.org/>.
2. Akbari et al. Safeguarding gene drive experiments in the laboratory. *Science* **349**, 927-929. (2015).
3. MR4. Methods in Anopheles Research. <https://www.beiresources.org/Publications/MethodsInAnophelesResearch.aspx> (2015).

4. Carballar-Lejarazú R, Kelsey A, Pham TB, Bennett EP and James AA. Digital droplet PCR and IDAA for the detection of CRISPR indel edits in the malaria species *Anopheles stephensi*. *Biotechniques*. doi: 10.2144/btn-2019-0103. [Epub ahead of print] PMID:32040336 (2020).
5. Holt RA, et al. The Genome Sequence of the Malaria Mosquito *Anopheles gambiae*. *Science* **298** (5591): 129-149 (2002).
6. Pham, T.B., et al. Experimental population modification of the malaria vector mosquito, *Anopheles stephensi*. *PLoS Genetics* **15**(12):e1008440. (2019).
7. Li, H. Aligning sequence reads, clone sequences and assembly contigs with BWA-MEM. *arXiv preprint arXiv:1303.3997* (2013).
8. Sharakhova, M.V. et al. Update of the *Anopheles gambiae* PEST genome assembly. *Genome Biol.* **8**, R5 (2007).
9. Garrison, E. & Marth, G. Haplotype-based variant detection from short-read sequencing. *arXiv preprint arXiv:1207.3907* (2012).
10. The *Anopheles gambiae* 1000 Genomes Consortium. Ag1000G phase 2 AR1 data release. (2017).
11. Drury, D.W., Dapper, A. L., Siniard, D. J., Zentner, G. E. & Wade, M. J. CRISPR/Cas9 gene drives in genetically variable and nonrandomly mating wild populations. *Science Advances* **3**, e1601910 (2017).
12. Li, J., Beerntsen, B.T. & James A.A. Oxidation of 3-hydroxykynurenine to produce xanthommatin for eye pigmentation: a major branch pathway of tryptophan catabolism during pupal development in the yellow fever mosquito, *Aedes aegypti*. *Insect Biochem. Mol. Biol.* **29**:329-38. (1999).
13. Han Q., Beerntsen, B.T. & Li, J. The tryptophan oxidation pathway in mosquitoes with emphasis on xanthurenic acid biosynthesis. *J Insect Physiol.* **53**:254-63. (2007).
